# Supplementary material for: A systematic study on the chemical diversity and efficacy of the inflorescence and succulent stem of Cynomorium songaricum
Source: Royal Society of Chemistry journal article supplement (doi:10.1039/d1fo01275d), 2021-01-01
Supplement: d1fo01275d1.pdf [file d1fo01275d1.pdf]

## Supplementary Material

A systematic study on the chemical diversity and efficacy of inflorescence and succulent stem of *Cynomorium songaricum*

Yan Zheng<sup>1,2</sup>, Sun Xiao<sup>1</sup>, Yujing Miao<sup>1</sup>, Shunwang Qin<sup>3</sup>, Yuan Jiang<sup>1,4</sup>, Xiang Zhang<sup>1</sup>, Linfang Huang<sup>1\*</sup>

1 Key Laboratory of Chinese Medicine Resources Conservation, State Administration of Traditional Chinese Medicine of the People's Republic of China, Institute of Medicinal Plant Development, Chinese Academy of Medical Sciences & Peking Union Medical College, Beijing, China

2 Jiangxi University of Traditional Chinese Medicine, Nanchang, Jiangxi, China

3 Chengdu University, Chengdu, Sichuan, China

4 Dali University, Da Li, Yun Nan, China

Yan Zheng: zhengyan6886@163.com

\*Correspondence:

Linfang

Huang:

lfhuang@implad.ac.cn;

## Supplement methods

### 1. ESI-Q TRAP-MS/MS

LIT and triple quadrupole (QQQ) scans were acquired on a triple quadrupole-linear ion trap mass spectrometer (Q TRAP, API 6500 Q TRAP LC/MS/MS System) equipped with an ESI Turbo Ion-Spray interface. It was operated in a positive ion mode and controlled by Analyst 1.6.3 software (AB Sciex). The ESI source operation parameters were as follows: ion source, turbo spray; source temperature 500 °C; ion spray voltage, 5500 V; ion source gas I (GSI), gas II (GSII), and curtain gas was set at 55, 60, and 25.0 psi, respectively; collision gas was high. Instrument tuning and mass calibration were performed with 10 and 100 µmol/L polypropylene glycol solutions in QQQ and LIT modes, respectively. QQQ scans were acquired as MRM experiments with collision gas (nitrogen) set to 5 psi. DP and CE for individual MRM transitions were done with further DP and CE optimization. A specific set of MRM transitions were monitored for each period according to the metabolites eluted within this period.

### 2. Molecular docking method

#### 2.1 Ligand preparation

AutoDock Vina accept files only in PDBQT file format. The docking GUI frontend PyRx was applied to prepare all protein and compound files for molecular docking, which was also employed to produce docking parameter input files. Therefore, the target and ligand must be converted into PDBQT format by PyRx tool (AutoDock Ligand) <sup>1</sup>.

#### 2.2 Molecular docking

AutoDock Vina <sup>2</sup> were used for the molecular docking studies. Positive compounds, compounds, and three protein targets were loaded into PyRx (Python 2.6.5) 0.8 with the incorporation of Autodock vina. For each of the docking steps, the OpenBabel <sup>3</sup> was used to import the ligands, which is a plug-in tool in PyRx 0.8. The 'Maximize' option in PyRx was used to define the docking boxes around the targets, since it could ensure the availability of the entire protein surface and accessible interior pockets for potential binding of ligands during 'blind' docking. For the 3 protein targets, the Dimensions (Angstrom) of ALB is X:79.8647, Y:107.4559, and Z:78.8741. The Dimensions (Angstrom) of MPO target Dimensions (Angstrom) is X:81.7875, Y:87.7630, and Z:104.8763. The Dimensions (Angstrom) of NOS<sub>2</sub> Dimensions (Angstrom) is X:147.8857, Y:85.1181, and Z 133.2018.

The default exhaustiveness value of 8 was set for all molecular dockings. The

compounds were then ranked by their binding energies. The dockings were performed by specifying fixed structures for protein receptors, whereas the ligands were semi-rigid with full torsional flexibility. The Intel Xeon Sandy Bridge 2.6 GHz Broadwell nodes of the high-performance computing cluster located at the National Computational Infrastructure (Canberra, Australia) was used to conduct Autodock Vina calculations<sup>4</sup>. All the other parameters were kept as default. After the completion of the docking process, the binding affinities of the protein for the compounds for the selected clusters were recorded in Table S9 and S10.

Reference:

1. S. Dallakyan and A. J. Olson, Small-Molecule Library Screening by Docking with PyRx, *Methods in Molecular Biology*, 2015, **1263**, 243.
2. O. Trott and A. J. Olson, Software news and update AutoDock Vina: Improving the speed and accuracy of docking with a new scoring function, efficient optimization, and multithreading, *Journal of Computational Chemistry*, 2010, **31**, 455-461.
3. N. M. O'Boyle, M. Banck, C. A. James, C. Morley and G. R. Hutchison, Open Babel: An open chemical toolbox, *Journal of Cheminformatics*, 2011, **3**, 33.
4. H. Li, A. Hung and A. Yang, Herb-target virtual screening and network pharmacology for prediction of molecular mechanism of Danggui Beimu Kushen Wan for prostate cancer, *Scientific Reports*, 2021, **11**, 6656.

## Supplementary figures

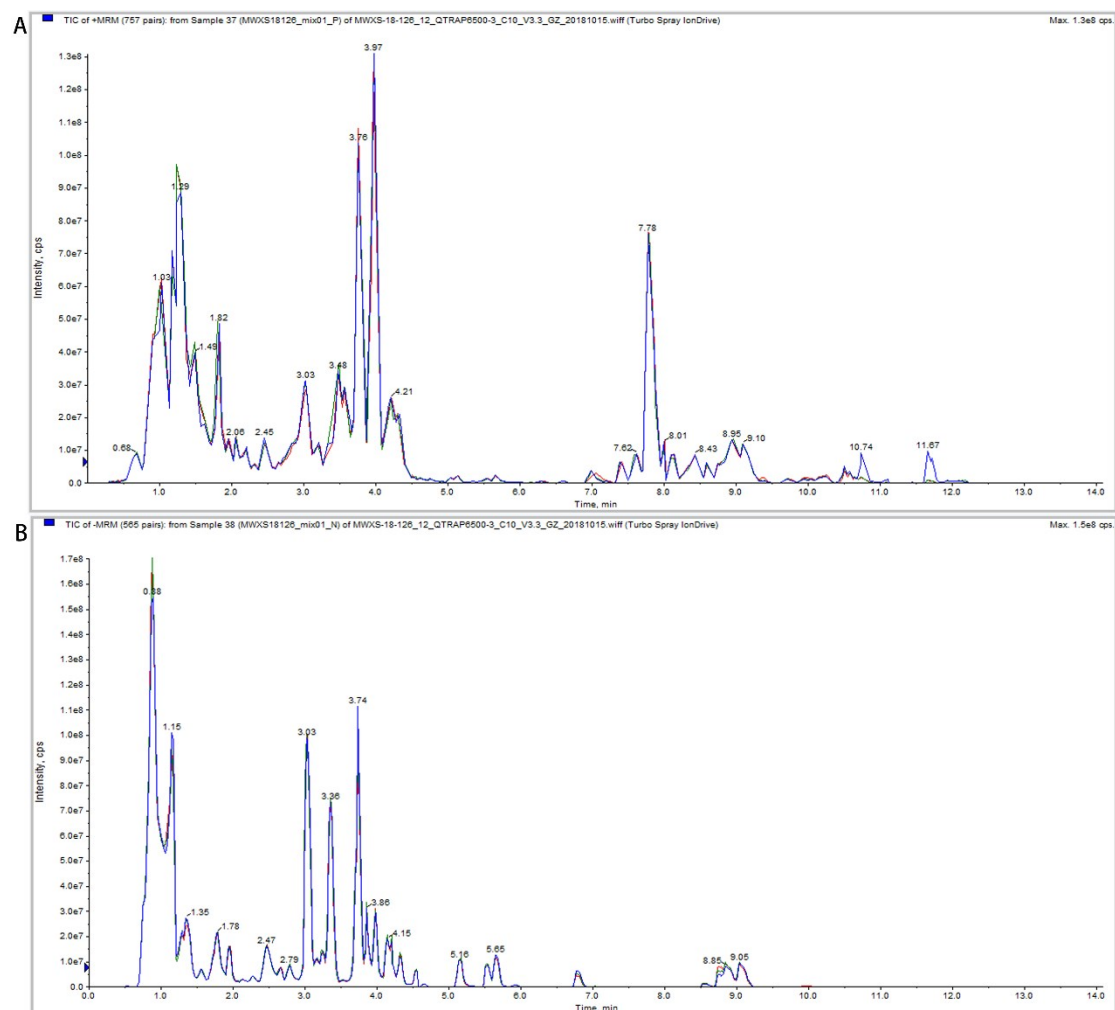

Figure S1. QC sample mass spectrometry detection TIC overlay image. (A) Positive ion current of one quality control sample by mass spectrometry detection. (B) Negative ion current of one quality control sample by mass spectrometry detection

Note: the superposition diagram of the total ion flow map (TIC) detected by QC sample mass spectrometry. The results showed that the curve overlap of metabolite detection of total ion current was high, that is, the retention time and peak intensity were the same, indicating that the signal stability was good when the same sample was detected by mass spectrometry at different time. The high stability of the instrument provides an important guarantee for the repeatability and reliability of the data.

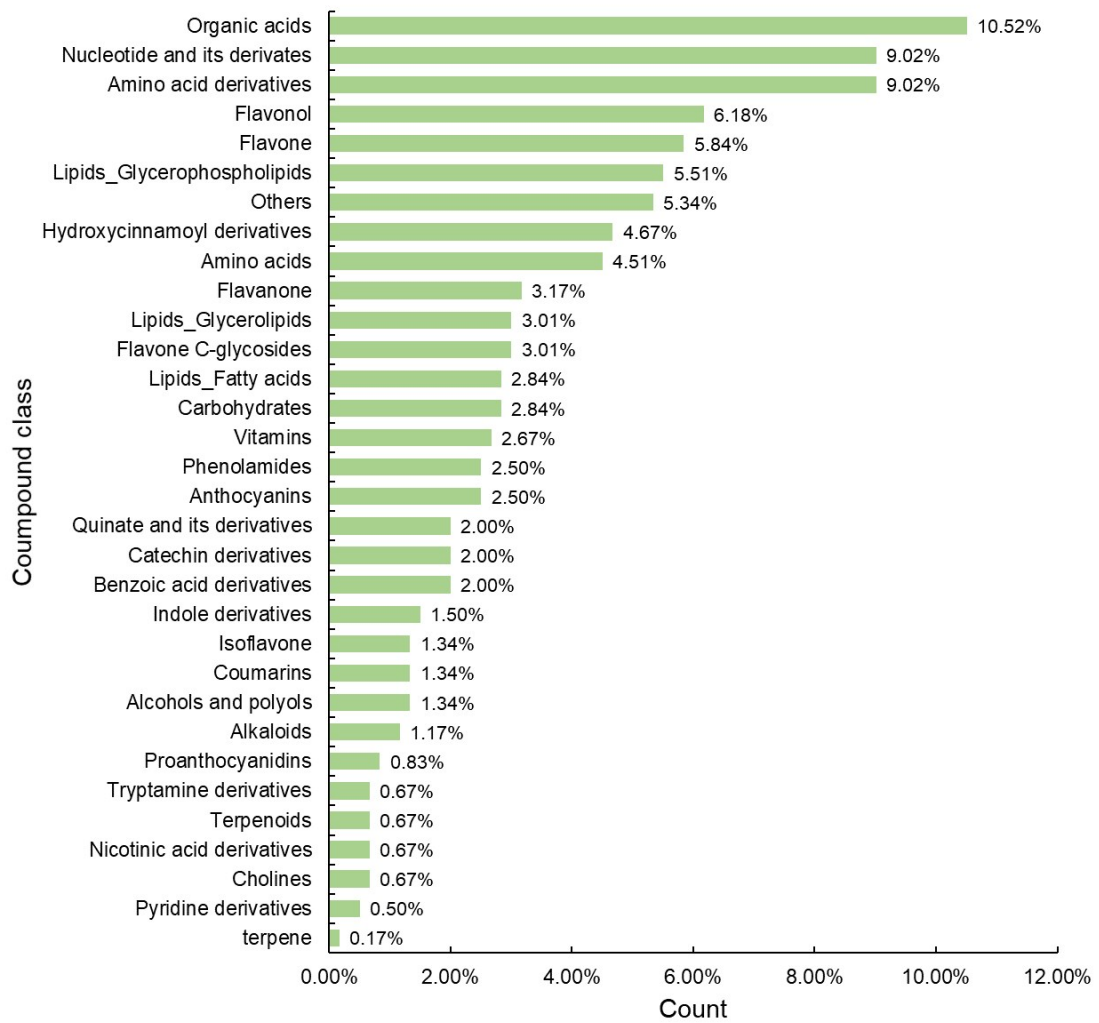

Figure S2. The compound class of succulent stem and inflorescence of *C. songaricum*.

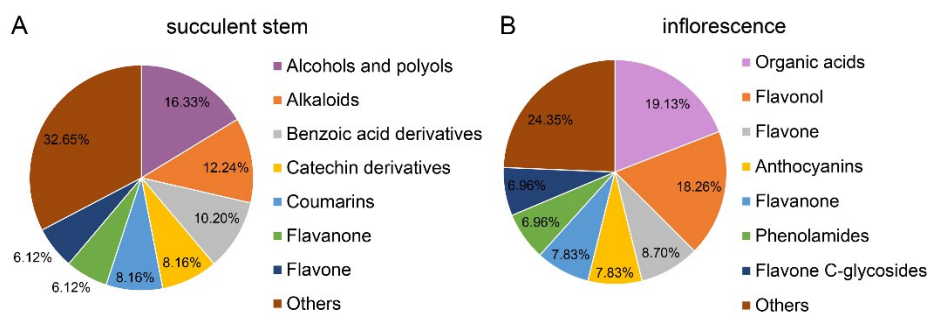

Figure S3. Types of metabolites in succulent stem and inflorescence. (A) Types of metabolites in the succulent stem; (B) Types of metabolites in the inflorescence.



Figure S4. Differential metabolite KEGG classification chart

Note: The ordinate is the name of the KEGG metabolic pathway, and the abscissa is the number of metabolites annotated to the pathway and its proportion to the total number of metabolites annotated.

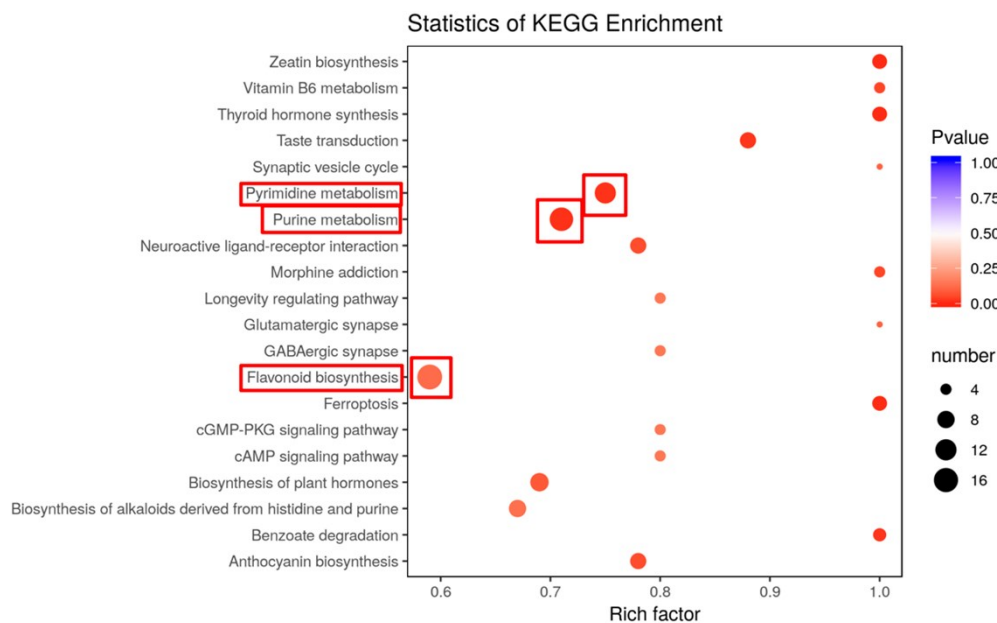

Figure S5. KEGG enrichment analysis of differentially accumulating metabolites between succulent stem and inflorescence.

Note: The abscissa represents the rich factor corresponding to each channel, the ordinate is the channel name, and the color of the point is *p*-value. The redder, the more significant the enrichment. The size of the dot represents the number of different metabolites enriched.

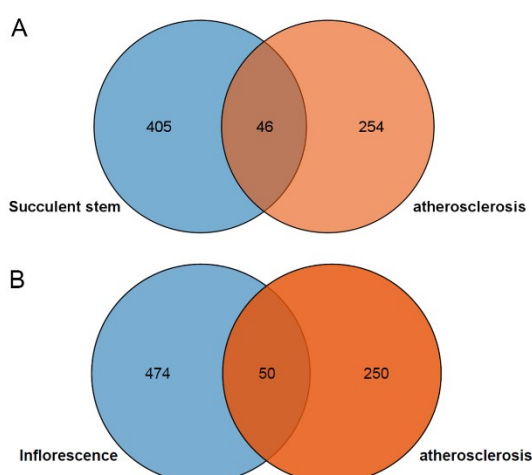

Figure S6. Common genes of succulent stem compounds, inflorescence compounds, and atherosclerosis disease. (A) Common genes of succulent stem compounds and atherosclerosis disease. (B) Common genes of inflorescence compounds and atherosclerosis disease.

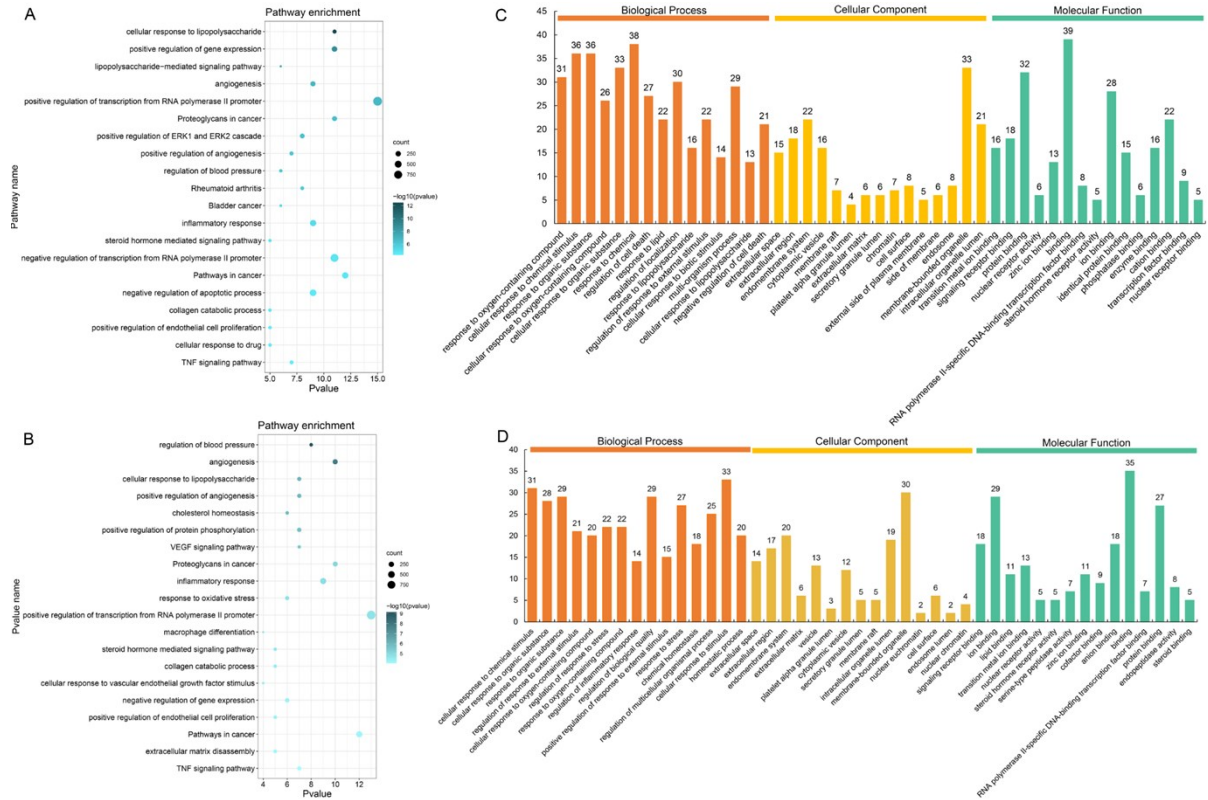

Figure S7. KEGG and GO enrichment analysis of succulent stem and inflorescence. (A) KEGG enrichment analysis of the target genes of the succulent stem by DAVID database. (B) KEGG enrichment analysis of the target genes of inflorescence by DAVID database. (C) The enrichment analysis in biological processes, cellular components, and molecular functions of 39 identified target proteins of the succulent stem by STRING database. (D) The enrichment analysis in biological processes, cellular components, and molecular functions of 36 identified target proteins of inflorescence by STRING database. Note: Counts refer to the number of the enriched genes.



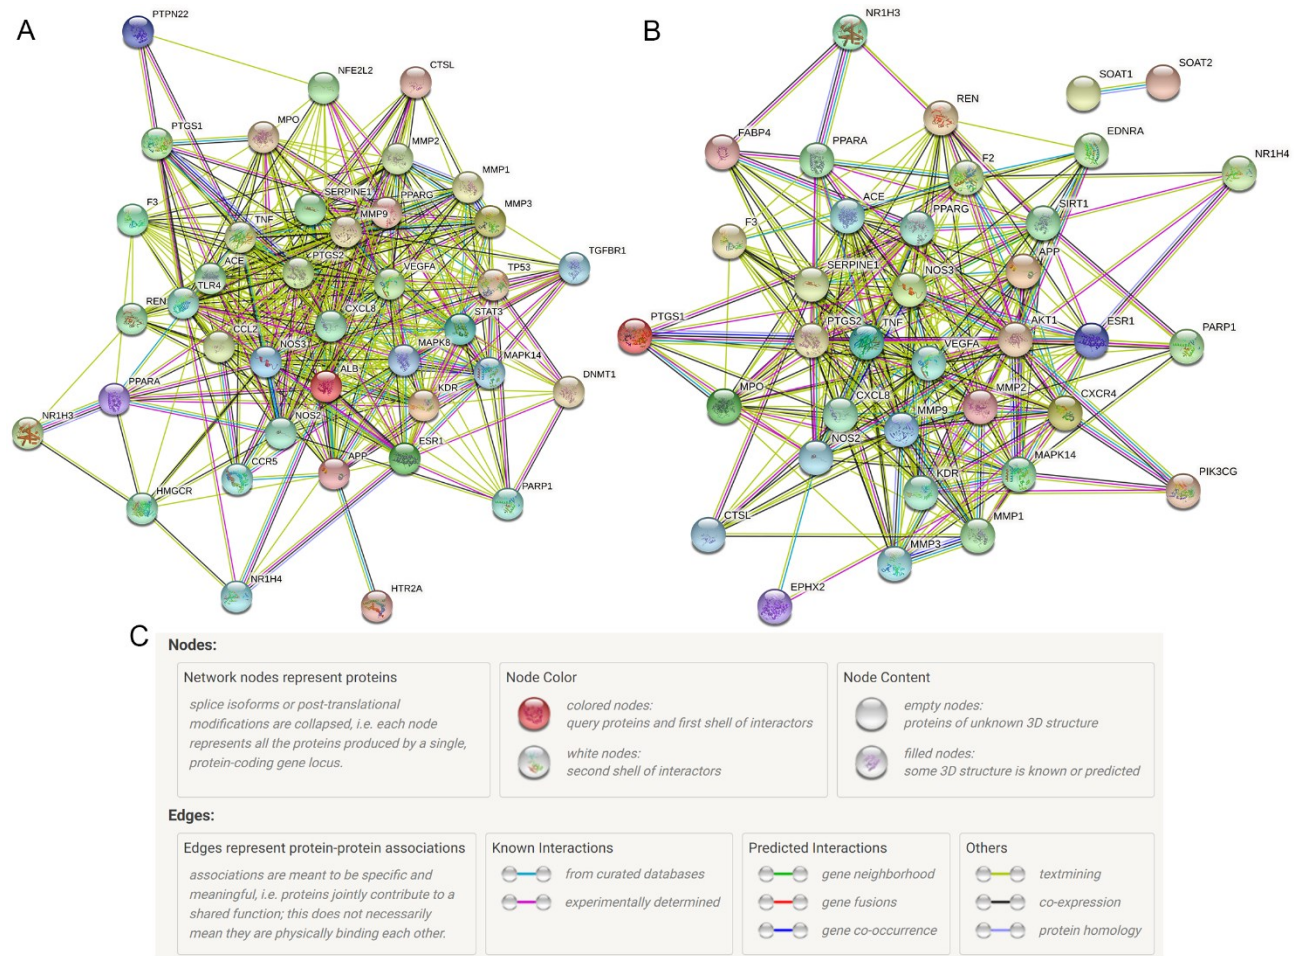

Figure S8. Protein-Protein interaction (PPI) network. (A) PPI network of succulent stem exported from the STRING database. (B) PPI network of inflorescence exported from the STRING database. (C) Annotations for the nodes and edges in the PPI network.

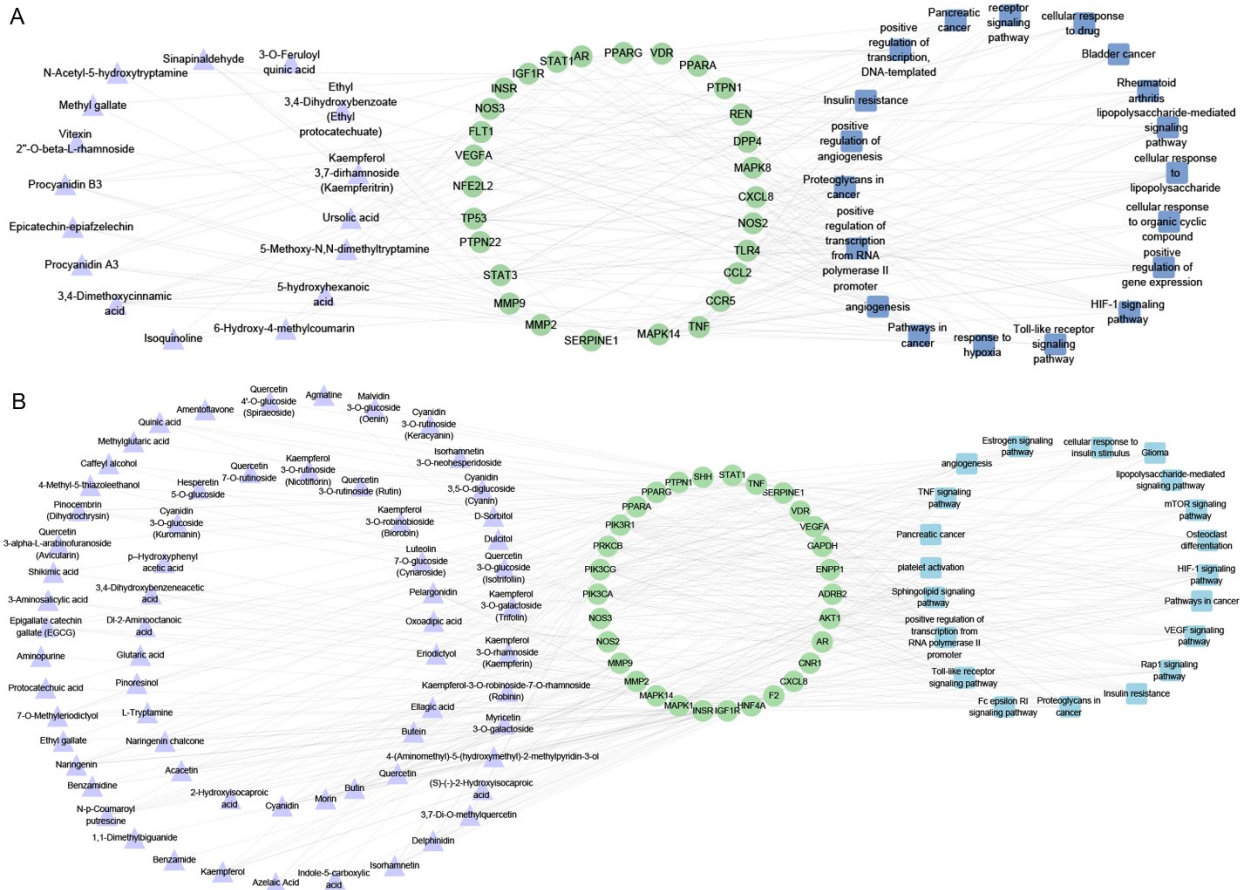

Figure S9. Compound-protein target-pathway map of succulent stem and inflorescence in diabetes. (A) Compound-protein target-pathway map of the succulent stem. (B) Compound-protein target-pathway map of the inflorescence. Note: Purple triangles represent compounds, green circles represent protein targets, and blue squares represent pathways.

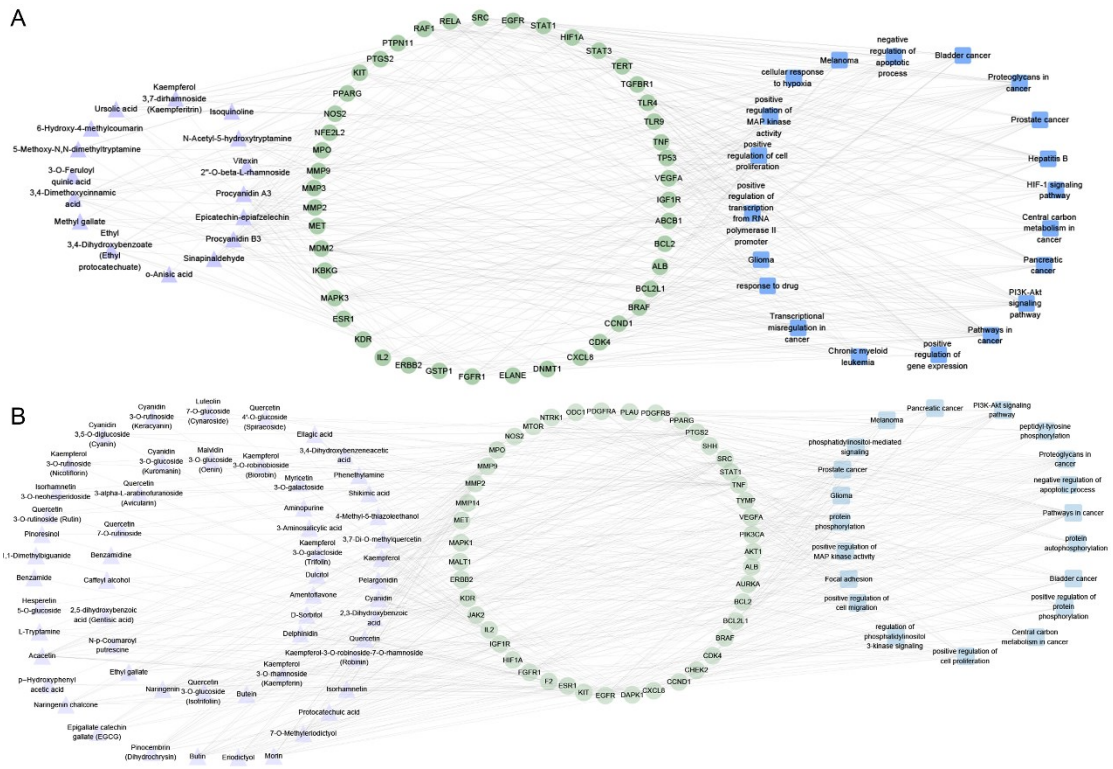

Figure S10. Compound-protein target-pathway map of succulent stem and inflorescence in gastric ulcer. (A) Compound-protein target-pathway map of the succulent stem. (B) Compound-protein target-pathway map of the inflorescence. Note: Purple triangles represent compounds, green circles represent protein targets, and blue squares represent pathways.

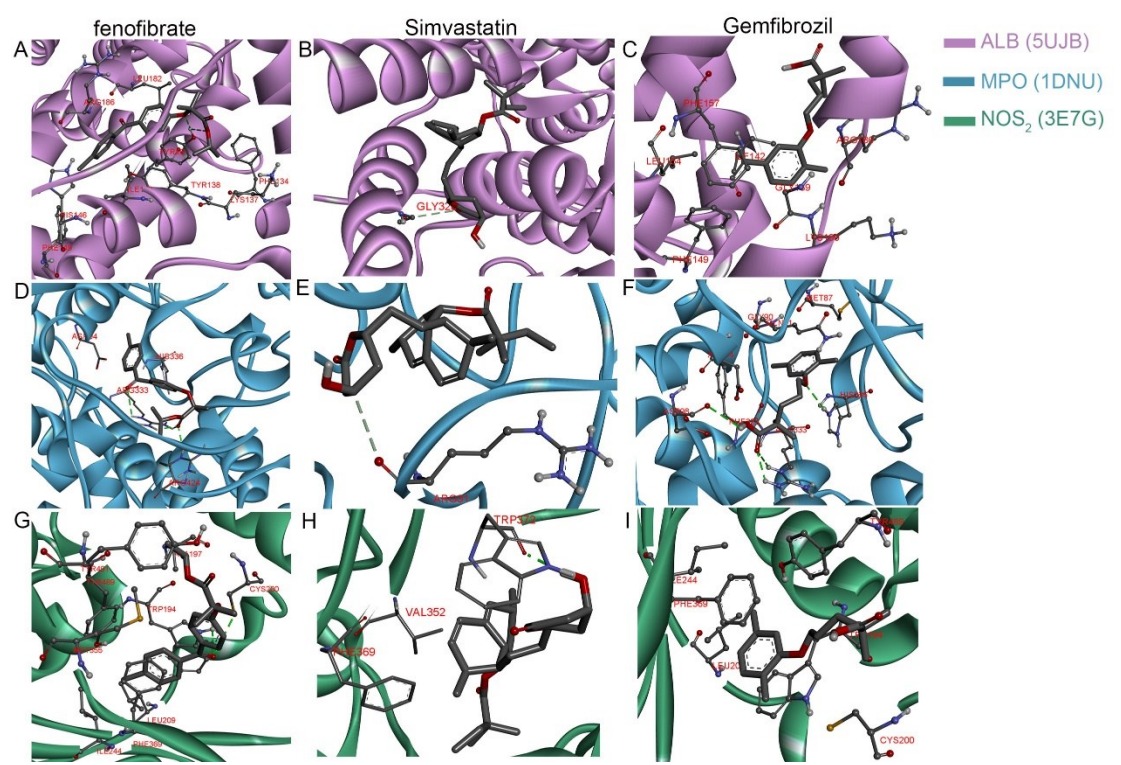

Figure S11. Molecular docking results of the positive drug. (A) The action mode of ALB and

fenofibrate; (B) The action mode of ALB and Simvastatin; (C) The action mode of ALB and gemfibrozil; (D) The action mode of MPO and fenofibrate; (E) The action mode of MPO and Simvastatin; (F) The action mode of MPO and gemfibrozil; (G) The action mode of NOS<sub>2</sub> and fenofibrate; (H) The action mode of NOS<sub>2</sub> and Simvastatin; (I) The action mode of NOS<sub>2</sub> and gemfibrozil.
