# Supplementary material for: A systematic study on the chemical diversity and efficacy of the inflorescence and succulent stem of Cynomorium songaricum
Source: Royal Society of Chemistry journal article supplement (doi:10.1039/d1fo01275d), 2021-01-01
Supplement: d1fo01275d2.xlsx [file d1fo01275d2.xlsx]

## Sheet: Table S1
Table S1. The metabolomics samples in succulent stem and inflorescence of C. songaricum
Number	Part	Longitude	Latitude	Elevation /m	Group
A1	succulent stem	106.652	38.5378	1211	A
A2	succulent stem	106.649	38.5342	1193	A
A3	succulent stem	106.652	38.5381	1221	A
B1	inflorescence	106.652	38.5378	1211	B
B2	inflorescence	106.649	38.5342	1193	B
B3	inflorescence	106.652	38.5381	1221	B

## Sheet: Table S2
Table S2. Differentially accumulating metabolites between succulent stems and inflorescences
Index	Compounds	Class	NX1	NX2	NX3	BW1	BW2	BW3	VIP	Fold_Change	Log2FC
			Peak area
pme0499	D-Sorbitol	Alcohols and polyols	47900	45600	64000	103000	108000	228000	1.12043	2.7873	1.47887
pme0513	Xylitol	Alcohols and polyols	26700	28300	50300	63600	42700	53300	0.894329	1.51567	0.599955
pme1944	D-Mannitol	Alcohols and polyols	24000	35100	38600	9	9	19100	0.956372	0.195681	-2.35343
pme2237	Dulcitol	Alcohols and polyols	75700	60700	85100	128000	151000	344000	1.06896	2.81264	1.49193
pme2256	D-Arabitol	Alcohols and polyols	9770	13800	20600	62300	40600	66200	1.20603	3.82839	1.93674
pme2529	1,5-Anhydro-D-glucitol	Alcohols and polyols	65800	69500	58800	64300	80200	77800	0.797237	1.14529	0.195708
pme2636	Enterodiol	Alcohols and polyols	105000	118000	76800	27800	31200	32200	1.26	0.304203	-1.71689
pme3840	Pantothenol	Alcohols and polyols	51400	97000	75300	12500	26400	24500	1.17312	0.283415	-1.81901
pmb0037	Hordenine	Alkaloids	223000	253000	236000	167000	246000	213000	0.662356	0.879213	-0.185715
pmb0782	Piperidine	Alkaloids	5230000	8570000	6820000	10400000	10200000	13700000	1.07904	1.66343	0.734164
pmb0785	Isoquinoline	Alkaloids	278000	213000	158000	64400	131000	77500	1.10836	0.420493	-1.24985
pme1611	Isohemiphloin	Alkaloids	1510000	1760000	1270000	1100000	784000	698000	1.11779	0.568722	-0.814203
pme1828	Betaine	Alkaloids	1390000	691000	1830000	1540000	842000	858000	0.273054	0.828433	-0.271544
pme2155	Theobromine	Alkaloids	160000	161000	230000	164000	111000	111000	0.920136	0.700544	-0.513451
pme2268	Trigonelline	Alkaloids	11000000	8240000	7140000	11300000	7040000	8270000	0.0267724	1.00872	0.0125239
pmb0464	Aspartic acid di-O-glucoside	Amino acid derivatives	4710000	7150000	7640000	2080000	4660000	3940000	0.962858	0.547692	-0.868562
pmb0962	Lysine butyrate	Amino acid derivatives	28600	54700	61800	114000	268000	292000	1.14993	4.64507	2.2157
pmb2561	N-Acetylmethionine	Amino acid derivatives	701000	1020000	1280000	2960000	1820000	2200000	1.14408	2.32589	1.21778
pmb2591	Acetyl tryptophan	Amino acid derivatives	18100000	11700000	9280000	4580000	2520000	3730000	1.19278	0.277124	-1.8514
pmb2673	3-(6-Hydroxy-3,4-dioxo-1,5-cyclohexadien-1-yl)-L-alanine	Amino acid derivatives	13300	9610	21500	15500	16000	19300	0.455827	1.14389	0.193944
pmb2873	3-(2-Naphthyl)-D-alanine	Amino acid derivatives	455000	411000	468000	238000	591000	576000	0.0608426	1.05322	0.0748115
pme0025	L-Kynurenine	Amino acid derivatives	17200000	8170000	14400000	9640000	24700000	20600000	0.480309	1.38144	0.466176
pme0056	2,3-dimethylsuccinic acid	Amino acid derivatives	763000	1360000	772000	849000	1220000	891000	0.133923	1.02245	0.0320338
pme0066	Guanidineacetic acid	Amino acid derivatives	13300	16300	17600	145000	67400	53500	1.20985	5.63347	2.49403
pme0075	N-Acetyl-L-glutamic acid	Amino acid derivatives	5790000	5750000	5890000	3840000	3220000	3050000	1.25278	0.580034	-0.78579
pme0109	(-)-3-(3,4-Dihydroxyphenyl)-2-methylalanine	Amino acid derivatives	1180000	1290000	1350000	1240000	1440000	1110000	0.0975109	0.992147	-0.0113748
pme0113	γ-Glu-Cys	Amino acid derivatives	523000	242000	120000	1980000	1580000	2090000	1.19122	6.38418	2.6745
pme0120	5-Aminovaleric acid	Amino acid derivatives	524000	561000	494000	356000	688000	604000	0.014042	1.0437	0.0617051
pme0121	N6-Acetyl-L-lysine	Amino acid derivatives	91400	48700	93400	327000	181000	364000	1.17544	3.73448	1.90091
pme0124	Glycyl-L-proline	Amino acid derivatives	72200	66500	709000	120000	104000	123000	0.221891	0.409343	-1.28862
pme0128	D-Alanyl-D-Alanine	Amino acid derivatives	2990	2390	3040	8670	11200	13100	1.26508	3.91568	1.96926
pme0133	Asp-phe	Amino acid derivatives	1780000	1190000	1530000	1170000	987000	1030000	1.02459	0.708222	-0.497726
pme0137	Nα-Acetyl-L-glutamine	Amino acid derivatives	205000	166000	229000	179000	145000	324000	0.0649008	1.08	0.111031
pme0164	N-γ-Acetyl-N-2-Formyl-5-methoxykynurenamine	Amino acid derivatives	12900	9600	11500	5540	12100	4990	0.827863	0.665588	-0.587298
pme0171	N-Isovaleroylglycine	Amino acid derivatives	9	9	10100	84400	110000	1170000	1.08742	134.849	7.0752
pme0174	N-Propionylglycine	Amino acid derivatives	2210000	3320000	3130000	5160000	6400000	6230000	1.20158	2.05427	1.03863
pme0176	Phenylacetyl-L-glutamine	Amino acid derivatives	7840	3960	7830	12900	13500	18200	1.11469	2.27203	1.18398
pme0180	1-Methylhistidine	Amino acid derivatives	12100	11700	14800	89900	118000	96300	1.28557	7.88083	2.97835
pme0190	N-Glycyl-L-leucine	Amino acid derivatives	44200	23800	37000	378000	560000	548000	1.27537	14.1524	3.82297
pme0231	N-(3-Indolylacetyl)-L-alanine	Amino acid derivatives	219000	294000	230000	49900	58000	107000	1.206	0.289233	-1.7897
pme0247	trans-4-Hydroxy-L-proline	Amino acid derivatives	54500	45100	57300	135000	86200	168000	1.16906	2.48056	1.31067
pme0252	N-Acetyl-l-leucine	Amino acid derivatives	144000000	155000000	124000000	65900000	49600000	71100000	1.23387	0.441135	-1.18071
pme0279	2,6-Diaminooimelic acid	Amino acid derivatives	529000	398000	460000	447000	620000	609000	0.731555	1.20836	0.273054
pme1018	Glutathione oxidized	Amino acid derivatives	1220000	988000	272000	7460000	7170000	7990000	1.20577	9.12097	3.18919
pme1090	Glutathione reduced form	Amino acid derivatives	703000	423000	162000	2700000	2630000	2190000	1.1808	5.83851	2.5456
pme1228	5-Hydroxy-L-tryptophan	Amino acid derivatives	1970000	1730000	2000000	1870000	2490000	2140000	0.713618	1.14035	0.189478
pme1239	S-(methyl)glutathione	Amino acid derivatives	70800	68500	88300	154000	175000	158000	1.2587	2.13972	1.09742
pme1286	S-(5'-Adenosy)-L-homocysteine	Amino acid derivatives	5620000	3750000	6500000	55500000	38300000	54400000	1.27325	9.33837	3.22317
pme1313	N'-Formylkynurenine	Amino acid derivatives	816000	670000	725000	14000000	6140000	3880000	1.22672	10.8639	3.44147
pme1322	Nα-Acetyl-L-arginine	Amino acid derivatives	9	9	50600	51300	41300	27900	0.889074	2.38058	1.25131
pme1368	L-Pipecolic acid	Amino acid derivatives	367000	154000	512000	957000	533000	532000	0.873601	1.95741	0.968943
pme1419	L-Methionine methyl ester	Amino acid derivatives	175000	146000	272000	874000	1600000	1080000	1.24193	5.99325	2.58334
pme1715	L-Saccharopine	Amino acid derivatives	1380000	1320000	1020000	934000	869000	823000	1.10987	0.705914	-0.502436
pme2122	Histamine	Amino acid derivatives	261000	148000	230000	727000	777000	801000	1.25008	3.6072	1.85088
pme2430	N-Acetyl-L-tyrosine	Amino acid derivatives	1560000	3650000	4330000	518000	300000	397000	1.22	0.127358	-2.97303
pme2560	N-Acetylaspartate	Amino acid derivatives	9	53700	67900	9	9	9	0.917424	0.000222023	-12.137
pme2569	(5-L-Glutamyl)-L-amino acid	Amino acid derivatives	126000	180000	99000	166000	154000	138000	0.498114	1.13086	0.177426
pme2617	Methionine sulfoxide	Amino acid derivatives	417000	420000	414000	617000	480000	620000	1.13833	1.3725	0.456808
pme2698	Phe-Phe	Amino acid derivatives	166000	142000	283000	806000	915000	844000	1.24418	4.3401	2.11773
pme2735	S-(5'-Adenosyl)-L-methionine	Amino acid derivatives	50000000	26400000	15500000	127000000	241000000	284000000	1.19551	7.09467	2.82674
pme2915	3-Hydroxy-3-methylpentane-1,5-dioic acid	Amino acid derivatives	549000	545000	336000	169000	252000	191000	1.16665	0.427972	-1.22441
pme3017	2-Aminoisobutyric acid	Amino acid derivatives	3800000	4610000	3980000	4650000	5630000	5690000	1.06081	1.28894	0.366188
pme3033	N,N-Dimethylglycine	Amino acid derivatives	2020000	2280000	2120000	2550000	3050000	3120000	1.16404	1.35826	0.441755
pme3038	5-oxoproline	Amino acid derivatives	448000	439000	468000	691000	604000	533000	1.14597	1.34908	0.431973
pme3194	N-acetylglycine	Amino acid derivatives	1890000	867000	1600000	2010000	9	9	0.888312	0.461331	-1.11613
pme3351	Allysine(6-Oxo DL-Norleucine)	Amino acid derivatives	9	14400	26200	71000	47600	91500	0.76663	5.17373	2.3712
pme3382	N-Acetylthreonine	Amino acid derivatives	212000	438000	1060000	191000	170000	157000	0.940951	0.302924	-1.72297
pme3388	H-HomoArg-OH	Amino acid derivatives	2060000	1720000	1810000	6640000	8180000	6580000	1.28197	3.82826	1.93669
pme3827	3,4-Dihydroxy-DL-phenylalanine	Amino acid derivatives	284000	483000	428000	328000	318000	324000	0.644595	0.811715	-0.300954
pme0004	L-Homocitrulline	Amino acids	9	9	313000	523000	662000	581000	0.949949	5.64185	2.49617
pme0007	L-Citrulline	Amino acids	231000	152000	115000	2360000	1870000	1120000	1.25532	10.743	3.42532
pme0009	L-Serine	Amino acids	746000	1050000	1110000	1320000	1530000	1360000	1.06156	1.44873	0.534786
pme0011	L-Aspartic acid	Amino acids	12000000	8290000	6440000	10500000	9600000	11400000	0.601567	1.17845	0.236892
pme0013	L-Glutamic acid	Amino acids	6490000	10200000	6050000	14600000	18900000	18300000	1.18682	2.27792	1.18772
pme0016	L-(-)-Cystine	Amino acids	672000	542000	437000	2330000	1100000	1100000	1.12113	2.74379	1.45617
pme0018	L-Leucine	Amino acids	1080000	2090000	1550000	2860000	3460000	4030000	1.14139	2.1928	1.13277
pme0020	L-Phenylalanine	Amino acids	24900000	27700000	32200000	78800000	99900000	109000000	1.26711	3.39269	1.76243
pme0022	L-Threonine	Amino acids	256000	499000	756000	595000	656000	704000	0.615459	1.29385	0.371665
pme0026	L-(+)-Lysine	Amino acids	955000	951000	1190000	21900000	23200000	24700000	1.29163	22.5452	4.49475
pme0036	L-Histidine	Amino acids	628000	1220000	879000	3650000	4600000	4270000	1.2506	4.59113	2.19885
pme0039	L-Valine	Amino acids	18200000	22600000	28300000	31200000	46600000	48600000	1.08934	1.82923	0.871239
pme0041	L-Isoleucine	Amino acids	8690000	15600000	10400000	17900000	18500000	23400000	1.07051	1.72384	0.785626
pme0042	L-(+)-Arginine	Amino acids	933000	570000	848000	32100000	17300000	11200000	1.26554	25.7763	4.68797
pme0057	DL-homocysteine	Amino acids	728000	2170000	1590000	1420000	2560000	1420000	0.384624	1.20321	0.266887
pme0161	L-Homoserine	Amino acids	12000	19300	30200	28300	26700	26300	0.701921	1.32195	0.402669
pme0195	L-Cysteine	Amino acids	2040000	1990000	1650000	19800	20300	19400	1.29298	0.0104754	-6.57686
pme0226	L-Asparagine	Amino acids	46400000	32000000	32600000	45300000	44800000	44100000	0.838307	1.20901	0.273825
pme0463	L-Theanine	Amino acids	733000	724000	613000	3670000	3760000	3080000	1.28682	5.07729	2.34406
pme1002	L-Tyramine	Amino acids	572000	64600	512000	10600000	17000000	13600000	1.2134	35.8698	5.1647
pme1070	L-(-)-Tyrosine	Amino acids	14400000	32000000	31100000	21700000	35300000	19000000	0.00401589	0.980645	-0.0281969
pme1210	L-Methionine	Amino acids	2080000	1290000	4720000	14600000	16200000	15100000	1.19786	5.67367	2.50428
pme1408	L-Glutamine	Amino acids	2690000	1960000	3540000	12900000	9860000	11500000	1.25262	4.18315	2.06459
pme1872	L-Proline	Amino acids	347000	561000	453000	1000000	734000	927000	1.16211	1.95518	0.967301
pme2054	L-Tryptophan	Amino acids	26800000	36100000	28600000	25800000	21900000	19900000	1.01568	0.738798	-0.436748
pme2634	Dl-Norvaline	Amino acids	22100000	26800000	32800000	35500000	51200000	53500000	1.08377	1.71603	0.779078
pme2890	L-Homocystine	Amino acids	167000	318000	194000	728000	1550000	1120000	1.21334	5.00442	2.3232
pma1590	Peonidin O-hexoside	Anthocyanins	2040000	187000	345000	3240000	4030000	5020000	1.05975	4.77838	2.25652
pmb0542	Cyanidin 3-O-malonylhexoside	Anthocyanins	53700	54200	87500	50800	57500	77700	0.125136	0.951894	-0.0711278
pmb0545	Rosinidin O-hexoside	Anthocyanins	203000	252000	173000	236000	326000	250000	0.851042	1.29299	0.370715
pmb2957	Cyanidin O-syringic acid	Anthocyanins	1720000	50600	274000	4420000	7690000	8150000	1.07796	9.90903	3.30874
pme0094	Cyanidin 3-O-glucoside (Kuromanin)	Anthocyanins	23600000	764000	4080000	47300000	67300000	63500000	1.03318	6.26143	2.64649
pme0442	Delphinidin	Anthocyanins	76800	66400	109000	422000	533000	645000	1.26594	6.34417	2.66543
pme0444	Malvidin 3-O-glucoside (Oenin)	Anthocyanins	9	9	9	1120000	1530000	1540000	1.29338	155185	17.2436
pme1397	Pelargonidin	Anthocyanins	9	9	9	314000	152000	121000	1.29175	21740.7	14.4081
pme1398	Delphinidin 3-O-glucoside (Mirtillin)	Anthocyanins	259000	9	306000	459000	9	9	0.4011	0.812408	-0.299723
pme1773	Cyanidin 3-O-rutinoside (Keracyanin)	Anthocyanins	636000	102000	320000	11600000	16000000	23900000	1.24573	48.6767	5.60516
pme1777	Cyanidin 3,5-O-diglucoside (Cyanin)	Anthocyanins	16100000	551000	989000	46600000	76700000	70300000	1.10303	10.9751	3.45616
pme1786	Malvidin 3,5-diglucoside (Malvin)	Anthocyanins	90300	202000	100000	134000	95100	128000	0.084689	0.910273	-0.135629
pme1793	Pelargonin	Anthocyanins	476000	330000	372000	628000	569000	578000	1.14375	1.50679	0.591479
pme3392	Pelargonidin 3-O-beta-D-glucoside（Callistephin chloride)	Anthocyanins	2210000	9	461000	15000000	21100000	14600000	0.840693	18.9816	4.24653
pme3609	Cyanidin	Anthocyanins	572000	443000	362000	2670000	6300000	3640000	1.25055	9.15759	3.19497
pmb0247	p-Aminobenzoate	Benzoic acid derivatives	1740000	1680000	2150000	449000	668000	403000	1.25351	0.27289	-1.87361
pmb2654	Anthranilate O-hexosyl-O-hexoside	Benzoic acid derivatives	145000	373000	543000	627000	526000	741000	0.847564	1.78511	0.836012
pmb2871	2,5-dihydroxy benzoic acid O-hexside	Benzoic acid derivatives	9	9	9	1540000	3530000	3150000	1.29233	304444	18.2158
pmb2928	Gallic acid O-Hexoside	Benzoic acid derivatives	627000	897000	905000	684000	729000	760000	0.478816	0.894607	-0.160674
pmb3107	Syringic acid O-glucoside	Benzoic acid derivatives	1420000	2030000	2930000	602000	1200000	1250000	0.991181	0.47837	-1.0638
pme0240	Benzoic acid	Benzoic acid derivatives	15500	42000	34500	6470	12100	13500	1.03892	0.348587	-1.52041
pme0309	Methyl gallate	Benzoic acid derivatives	53200000	71400000	86900000	13400000	18000000	25400000	1.22216	0.268558	-1.89669
pme0310	Ethyl gallate	Benzoic acid derivatives	9	9	9	53000	69900	145000	1.29081	9922.22	13.2764
pme0414	Vanillin	Benzoic acid derivatives	1150000	723000	743000	270000	281000	300000	1.24523	0.325306	-1.62013
pme1162	Gallic acid	Benzoic acid derivatives	107000000	74000000	330000000	93300000	110000000	134000000	0.296415	0.660078	-0.599291
pme1814	2,5-dihydroxybenzoic acid (Gentisic acid)	Benzoic acid derivatives	464000	266000	461000	1160000	1420000	1640000	1.22916	3.54324	1.82507
pme2670	4-Hydroxybenzaldehyde	Benzoic acid derivatives	67200	144000	139000	368000	146000	148000	0.77879	1.89035	0.918652
pma0134	D(-)-Threose	Carbohydrates	1490000	1530000	1400000	544000	913000	423000	1.15787	0.425339	-1.23331
pma6455	Ribulose-5-phosphate	Carbohydrates	222000	162000	184000	1310000	641000	904000	1.24588	5.02641	2.32953
pmb2653	D(+)-Melezitose O-rhamnoside	Carbohydrates	99300	161000	180000	130000	110000	139000	0.391522	0.860777	-0.216289
pmb2858	Maltotetraose	Carbohydrates	17600	22900	31700	28400	48000	71800	0.940511	2.05263	1.03747
pmb3081	Glucarate O-Phosphoric acid	Carbohydrates	639000	609000	905000	1600000	1830000	1820000	1.24008	2.43846	1.28597
pmb3088	Trehalose 6-phosphate	Carbohydrates	163000	160000	190000	179000	167000	193000	0.447244	1.05068	0.0713264
pme0500	D(+)-Melezitose	Carbohydrates	167000	501000	593000	52800	107000	96500	1.11065	0.203251	-2.29866
pme0519	D-(+)-Sucrose	Carbohydrates	18300000	25500000	35000000	18100000	24300000	27300000	0.295323	0.884518	-0.177037
pme0534	Gluconic acid	Carbohydrates	2130000	2480000	2100000	9580000	6920000	6640000	1.26761	3.44858	1.786
pme1684	D-(+)-Glucono-1,5-lactone	Carbohydrates	30400	47000	50600	25900	34400	35000	0.782129	0.744531	-0.425596
pme1846	D(+)-Glucose	Carbohydrates	5720000	5620000	7800000	5160000	7550000	7340000	0.165826	1.04754	0.0670114
pme2019	DL-Arabinose	Carbohydrates	3690000	2620000	3630000	1760000	2340000	2530000	1.02476	0.667002	-0.584237
pme2755	N-Acetyl-D-glucosamine	Carbohydrates	2120000	1980000	2570000	1680000	2330000	2040000	0.495613	0.907046	-0.140752
pme3160	D-Glucose 6-phosphate	Carbohydrates	4700000	6100000	4300000	11000000	10400000	9130000	1.22818	2.02185	1.01568
pme3163	D-Sedoheptuiose 7-phosphate	Carbohydrates	667000	674000	1000000	2130000	2090000	2440000	1.24878	2.84494	1.5084
pme3313	D-Fructose 6-phosphate	Carbohydrates	1630000	2110000	1530000	3520000	3330000	2960000	1.22083	1.86148	0.89645
pme3705	D-glucoronic acid	Carbohydrates	76900	92700	236000	63900	150000	86600	0.351249	0.740878	-0.432693
pmb2586	Gallocatechin-catechin	Catechin derivatives	5250	5650	10900	1430000	1970000	1700000	1.28774	233.945	7.87003
pmb2831	Protocatechuic acid O-glucoside	Catechin derivatives	3460000	1050000	2210000	4560000	4030000	4150000	0.947489	1.89583	0.922832
pmb2947	Catechin-catechin-catechin	Catechin derivatives	9510000	9240000	16300000	4190000	4010000	4490000	1.20982	0.362054	-1.46572
pmb3114	Epicatechin-epiafzelechin	Catechin derivatives	193000	619000	257000	94400	92300	69200	1.13061	0.239383	-2.06261
pme0205	Catechin	Catechin derivatives	5410000	8880000	6820000	2560000	2680000	2710000	1.2392	0.376599	-1.4089
pme0460	L-Epicatechin	Catechin derivatives	12900000	4950000	19900000	6190000	7870000	9190000	0.490917	0.615894	-0.699246
pme1486	Epigallate catechin gallate (EGCG)	Catechin derivatives	510000	2430000	2690000	12500000	9010000	7850000	1.10915	5.21492	2.38265
pme1514	Epigallocatechin (EGC)	Catechin derivatives	315000	110000	218000	184000	240000	428000	0.465412	1.32504	0.406035
pme1535	(+)-Gallocatechin (GC)	Catechin derivatives	387000	528000	999000	2560000	1400000	1070000	1.02074	2.628	1.39397
pme1562	Epicatechin gallate (ECG)	Catechin derivatives	12500000	11900000	15600000	14100000	17900000	17900000	0.893056	1.2475	0.31904
pme1824	Protocatechuic acid	Catechin derivatives	3370000	1810000	3100000	10200000	11200000	12800000	1.24433	4.13043	2.04629
pme2482	Protocatechuic aldehyde	Catechin derivatives	16900000	23700000	19300000	7130000	6460000	5030000	1.25663	0.310851	-1.6857
pma1840	Coumaroyl choline	Cholines	237000	144000	73500	87500	51900	43100	0.937759	0.40154	-1.31638
pmb0484	Choline	Cholines	6090000	7750000	6540000	8630000	9170000	10000000	1.1419	1.36408	0.447931
pmb1754	O-Phosphocholine	Cholines	1920000	1900000	2100000	1620000	1940000	1590000	0.921739	0.869932	-0.201025
pme1691	Acetylcholine	Cholines	394000	225000	203000	575000	392000	291000	0.784278	1.53041	0.613922
pma0104	N-sinapoyl hydroxycoumarin	Coumarins	335000	9	225000	9	9	9	0.914957	4.82135e-05	-14.3402
pmb1178	O-Feruloyl 2-hydroxylcoumarin	Coumarins	4170000	5050000	3310000	108000	175000	135000	1.28639	0.0333599	-4.90574
pme2993	Scopoletin (7-Hydroxy-5-methoxycoumarin)	Coumarins	147000	51500	73800	57700	64600	66400	0.516046	0.692986	-0.529103
pme2996	4-Hydroxycoumarin	Coumarins	42800	48000	76900	42700	62900	95300	0.33755	1.19797	0.260595
pme3143	6-Hydroxy-4-methylcoumarin	Coumarins	115000	123000	94300	48100	62900	53900	1.23342	0.496238	-1.01089
pme3428	Esculin (6,7-Dihydroxycoumarin-6-glucoside)	Coumarins	20500	55300	57200	49800	45400	48700	0.323791	1.08195	0.11364
pme3553	Psoralen	Coumarins	19500	21000	23300	11600	24400	15500	0.657553	0.80721	-0.308984
pme3564	Daphnetin	Coumarins	9	9	89600	175000	174000	160000	0.955646	5.67966	2.50581
pma0791	Naringenin O-malonylhexoside	Flavanone	245000	138000	160000	91300	84700	80900	1.16081	0.473112	-1.07975
pmb0686	Eriodictyol O-malonylhexoside	Flavanone	1300000	705000	771000	564000	630000	379000	0.966421	0.566643	-0.819489
pmc1990	4'-Hydroxy-5,7-dimethoxyflavanone	Flavanone	46000	59600	31100	45400	35600	20800	0.594137	0.744696	-0.425276
pme0330	Naringenin 7-O-neohesperidoside (Naringin)	Flavanone	9	9	68400	1160000	4270000	6000000	1.09757	167.061	7.38423
pme0372	Naringenin 7-O-glucoside (Prunin)	Flavanone	12000000	12900000	16000000	9580000	18900000	24200000	0.397575	1.28802	0.365155
pme0377	Naringenin	Flavanone	618000	402000	520000	4070000	5570000	6670000	1.2767	10.5909	3.40475
pme1201	Phloretin	Flavanone	1730000	1950000	4070000	4610000	4220000	5890000	1.00435	1.89935	0.925509
pme1399	Xanthohumol	Flavanone	3810	5180	23600	6150	6650	7990	0.138535	0.637926	-0.64854
pme1583	Eriodictyol	Flavanone	606000	433000	867000	4210000	5050000	5610000	1.26563	7.80168	2.96378
pme1598	Hesperetin 5-O-glucoside	Flavanone	5500000	7020000	7420000	35300000	54500000	44100000	1.27534	6.71515	2.74742
pme1600	7-O-Methyleriodictyol	Flavanone	49300	26400	35400	203000	16200000	397000	1.00427	151.215	7.24046
pme2960	Naringenin chalcone	Flavanone	634000	396000	530000	4100000	5630000	7190000	1.27314	10.8462	3.43911
pme2979	Pinocembrin (Dihydrochrysin)	Flavanone	134000	142000	201000	680000	620000	640000	1.27205	4.06709	2.024
pme2984	Isosakuranetin-7-neohesperidoside (Poncirin)	Flavanone	181000	154000	689000	141000	207000	184000	0.52141	0.519531	-0.944718
pme3215	Isoliquiritigenin	Flavanone	7640	8320	9880	6500	6530	5770	1.13755	0.727554	-0.458873
pme3237	Liquiritigenin	Flavanone	41800	40700	46600	94700	57400	86200	1.1421	1.84586	0.88429
pme3282	Afzelechin (3,5,7,4'-Tetrahydroxyflavan)	Flavanone	135000	176000	221000	1380000	569000	359000	1.09425	4.33835	2.11715
pme3439	Butein	Flavanone	9	9	9	16600	58500	58000	1.28669	4929.63	12.2673
pme3464	Isosakuranetin (4'-Methylnaringenin)	Flavanone	27400	9550	10700	44600	6100000	103000	0.904653	131.114	7.03468
mws2450	phloridzin	Flavone	3050000	3120000	2720000	4760000	4120000	3620000	1.14344	1.40607	0.491673
pma0249	Selgin 5-O-hexoside	Flavone	192000	417000	258000	2770000	1170000	1270000	1.20128	6.00923	2.58718
pma0760	Selgin O-malonylhexoside	Flavone	298000	230000	235000	143000	127000	175000	1.17218	0.583224	-0.777878
pma6199	Chrysin O-hexoside	Flavone	1940000	1650000	4430000	4260000	2510000	4250000	0.623052	1.37406	0.45845
pma6499	Limocitrin O-hexoside	Flavone	52400	48700	9	89500	147000	148000	0.713359	3.80283	1.92707
pma6558	Velutin	Flavone	8330	6510	4920	14300	2100000	23100	0.816184	108.168	6.75713
pmb0580	Chrysin 5-O-glucoside (Toringin)	Flavone	1930000	1510000	4060000	4180000	2410000	4050000	0.661192	1.41867	0.504536
pmb0587	Chrysoeriol O-glucuronic acid-O-hexoside	Flavone	9	19300	22800	79900	175000	143000	0.830571	9.44929	3.24021
pmb0603	Chrysoeriol O-hexosyl-O-hexoside	Flavone	9	7670	9	58900	137000	170000	1.09285	47.5937	5.5727
pmb0605	Apigenin 7-O-glucoside (Cosmosiin)	Flavone	1780000	1120000	1550000	1620000	2000000	1700000	0.692676	1.19551	0.257621
pmb0736	Tricin 7-O-hexoside	Flavone	91400	104000	117000	9	130000	9	0.902558	0.416191	-1.26468
pmb2850	Tricin	Flavone	6740	4440	5150	11500	474000	18600	0.871856	30.8696	4.94811
pmb2954	Luteolin O-hexosyl-O-hexosyl-O-hexoside	Flavone	112000	93700	111000	4020000	7030000	7090000	1.28702	57.2782	5.83991
pmb2987	Acacetin O-acetyl hexoside	Flavone	57500	89900	116000	49200	33500	46100	1.06605	0.48899	-1.03212
pmb2991	Apigenin O-hexosyl-O-rutinoside	Flavone	34800	47500	80500	13200	30700	31400	0.938004	0.462531	-1.11238
pmb2999	Chrysoeriol 5-O-hexoside	Flavone	65200	68500	81000	208000	269000	215000	1.27217	3.2231	1.68845
pmb3000	Chrysoeriol O-acetylhexoside	Flavone	9	9	9	9	11700	14200	0.910867	959.593	9.90628
pmb3002	Chrysoeriol 7-O-rutinoside	Flavone	9	9	9	191000	308000	276000	1.29299	28703.7	14.8089
pmb3012	Chrysoeriol 7-O-hexoside	Flavone	271000	356000	296000	309000	164000	227000	0.777162	0.758397	-0.398976
pmb3041	Tricin O-saccharic acid	Flavone	5360000	8220000	5640000	2700000	1620000	1390000	1.20346	0.297086	-1.75105
pmb3042	Tricin 5-O-hexoside	Flavone	60700	74100	19700	28200	9	12200	0.707315	0.261547	-1.93486
pmb3053	Tricin O-eudesmic acid	Flavone	9	9	9	53800	126000	20900	1.28402	7433.33	12.8598
pme0089	Luteolin	Flavone	879000	1360000	960000	1690000	673000	1090000	0.0619145	1.0794	0.110229
pme0208	Amentoflavone	Flavone	5040	8930	16500	28000	37900	34900	1.13359	3.30817	1.72603
pme0359	Apigenin 5-O-glucoside	Flavone	5520000	1640000	1760000	2240000	2280000	1250000	0.420716	0.646861	-0.628472
pme0364	Chrysoeriol	Flavone	225000	609000	571000	893000	2570000	822000	0.947324	3.04982	1.60873
pme0379	Apigenin	Flavone	140000	158000	138000	251000	311000	168000	1.02652	1.67431	0.743568
pme1518	Nobiletin	Flavone	445000	224000	177000	168000	204000	155000	0.735192	0.622931	-0.682855
pme1544	Acacetin	Flavone	9	9	9	22800	2870000	42900	1.2322	108730	16.7304
pme1547	Baicalein-7-O-glucuronide (Baicalin)	Flavone	59100	50500	39300	27900	25600	25100	1.20166	0.527871	-0.921743
pme1550	Tangeretin	Flavone	427000	214000	163000	140000	173000	136000	0.834623	0.558458	-0.84048
pme1601	Apigenin 4-O-rhamnoside	Flavone	36800	24600	28700	28700	9	9	0.913093	0.318735	-1.64957
pme1662	sakuranetin	Flavone	208000	86600	95600	381000	54800000	941000	0.911804	143.829	7.16821
pme2459	Luteolin 7-O-glucoside (Cynaroside)	Flavone	1910000	1860000	2270000	18400000	32700000	33800000	1.27672	14.0563	3.81314
pme3475	Butin	Flavone	645000	386000	525000	4050000	6260000	7340000	1.27008	11.3432	3.50375
pma0724	Naringenin C-hexoside	Flavone C-glycosides	1900000	1300000	1190000	731000	784000	519000	1.15494	0.463326	-1.1099
pma1108	Apigenin C-glucoside	Flavone C-glycosides	78800	161000	133000	95700	80200	76900	0.79812	0.678112	-0.560405
pma6353	Chrysin C-hexoside	Flavone C-glycosides	1150000	803000	646000	495000	397000	345000	1.13214	0.475952	-1.07111
pma6515	C-hexosyl-chrysin O-feruloylhexoside	Flavone C-glycosides	1900000	551000	3510000	182000	118000	193000	1.15713	0.0827042	-3.59589
pma6516	C-hexosyl-apigenin O-hexosyl-O-hexoside	Flavone C-glycosides	635000	285000	432000	3540000	729000	1320000	1.00472	4.13388	2.0475
pmb0618	8-C-hexosyl-hesperetin O-hexoside	Flavone C-glycosides	2800000	2340000	4470000	10600000	15300000	13600000	1.23473	4.1103	2.03924
pmb0619	Eriodictiol 6-C-hexoside 8-C-hexoside-O-hexoside	Flavone C-glycosides	109000	180000	96200	9	9	9	1.29257	7.00935e-05	-13.8004
pmb0623	6-C-hexosyl chrysoeriol O-hexoside	Flavone C-glycosides	9	9	9	2140000	2000000	2340000	1.29367	240000	17.8727
pmb0628	Eriodictiol C-hexosyl-O-hexoside	Flavone C-glycosides	480000	9	9	1170000	1690000	1420000	0.97793	8.91633	3.15645
pmb0639	8-C-hexosyl-apigenin O-hexosyl-O-hexoside	Flavone C-glycosides	1180000	538000	612000	4940000	1690000	2640000	1.11951	3.97854	1.99224
pmb0644	Luteolin C-hexoside	Flavone C-glycosides	9	9	9	79600	133000	91600	1.29276	11266.7	13.4598
pmb0645	6-C-hexosyl-hesperetin O-hexoside	Flavone C-glycosides	648000	540000	739000	1590000	3230000	2240000	1.21706	3.66373	1.87331
pmb0661	Chrysoeriol C-hexosyl-O-rhamnoside	Flavone C-glycosides	26700	9	16300	134000	130000	206000	0.856038	10.9279	3.44995
pmb0665	Luteolin 8-C-hexosyl-O-hexoside	Flavone C-glycosides	1100000	747000	1630000	23500000	36700000	42700000	1.27474	29.5945	4.88726
pmb0667	C-hexosyl-luteolin O-feruloylpentoside	Flavone C-glycosides	9	1190000	9	407000	9	343000	0.374471	0.63025	-0.666004
pmb2969	Hesperetin C-hexoside O-hexoside	Flavone C-glycosides	9	4560	9	34400	71700	78500	1.09703	40.3233	5.33354
pmb3023	Eriodictyol C-hexoside	Flavone C-glycosides	9140000	6540000	10500000	14900000	12500000	10900000	0.983567	1.46295	0.548879
pme3227	Vitexin 2''-O-beta-L-rhamnoside	Flavone C-glycosides	1120000	1350000	923000	191000	146000	137000	1.27812	0.139699	-2.8396
pma0214	methylQuercetin O-hexoside	Flavonol	624000	768000	662000	9	56600	64200	0.876219	0.0588165	-4.08764
pma1116	Kaempferide	Flavonol	389000	403000	667000	558000	270000	512000	0.22223	0.918437	-0.122747
pma6639	Isorhamnetin O-hexoside	Flavonol	5950000	6510000	14500000	4990000	8270000	10000000	0.193605	0.86276	-0.212969
pmb0151	5-Deoxyquercetin (Fisetin)	Flavonol	1290000	1310000	1460000	1690000	1370000	1380000	0.621258	1.0936	0.12908
pmb0565	Syringetin 3-O-hexoside	Flavonol	9	9	9	116000	171000	140000	1.29317	15814.8	13.949
pmb0595	Isorhamnetin 5-O-hexoside	Flavonol	5700000	6270000	13800000	4710000	8010000	9540000	0.197481	0.863795	-0.211239
pmb0706	Quercetin 5-O-malonylhexosyl-hexoside	Flavonol	63000	46900	48800	307000	214000	204000	1.26727	4.56837	2.19168
pmb0711	Quercetin 7-O-rutinoside	Flavonol	370000	222000	485000	7230000	13200000	14200000	1.27225	32.1541	5.00693
pmb3013	Isorhamnetin O-acetyl-hexoside	Flavonol	19100	17500	13500	9240	9810	9730	1.20425	0.574451	-0.799744
pmb3026	Quercetin O-acetylhexoside	Flavonol	112000	80900	95900	152000	131000	144000	1.14972	1.47853	0.564165
pmb3894	Di-O-methylquercetin	Flavonol	327000	607000	216000	20200000	7910000	2570000	1.18684	26.6783	4.73759
pme0197	Quercetin 3-O-rutinoside (Rutin)	Flavonol	109000	78100	140000	4010000	6070000	6730000	1.28425	51.391	5.68344
pme0200	Kaempferol	Flavonol	23400	41100	53600	1370000	1640000	1210000	1.27974	35.7324	5.15916
pme0361	Quercetin 3-alpha-L-arabinofuranoside (Avicularin)	Flavonol	1620000	1180000	1520000	14500000	34000000	27700000	1.26871	17.6389	4.14069
pme0369	Kaempferol 3-O-rutinoside (Nicotiflorin)	Flavonol	217000	289000	687000	78000000	111000000	102000000	1.28219	243.923	7.93028
pme1478	Myricetin	Flavonol	39400	32200	30000	49000	26200	41400	0.34809	1.14764	0.198667
pme1502	Kumatakenin	Flavonol	63100	26100	35700	164000	23700000	290000	0.924869	193.387	7.59534
pme1521	Dihydroquercetin (Taxifolin)	Flavonol	4970000	5860000	15400000	26200000	25200000	26100000	1.11655	2.95463	1.56298
pme1540	Isorhamnetin 3-O-neohesperidoside	Flavonol	312000	415000	510000	2760000	1270000	1490000	1.21061	4.46241	2.15782
pme1588	Isorhamnetin	Flavonol	4780	4420	8970	58900	56900	71100	1.26854	10.2862	3.36264
pme1605	Kaempferol 3-O-robinobioside (Biorobin)	Flavonol	233000	244000	671000	76200000	106000000	97600000	1.28243	243.728	7.92913
pme1622	Kaempferol 3-O-glucoside (Astragalin)	Flavonol	464000	812000	599000	873000	646000	614000	0.444846	1.1376	0.185993
pme2493	Kaempferol 3,7-dirhamnoside (Kaempferitrin)	Flavonol	5670000	7700000	12400000	2830000	2540000	2380000	1.20059	0.300737	-1.73342
pme2895	Dihydromyricetin	Flavonol	33100	54500	9	364000	290000	175000	0.824367	9.4625	3.24222
pme2954	Quercetin	Flavonol	920000	1540000	2670000	9020000	5610000	7040000	1.18139	4.22417	2.07867
pme2963	Aromadedrin (Dihydrokaempferol)	Flavonol	1030000	597000	1000000	12700000	9220000	7600000	1.27101	11.2372	3.4902
pme3130	Quercetin 4'-O-glucoside (Spiraeoside)	Flavonol	722000	718000	803000	1970000	3410000	3060000	1.249	3.76282	1.91181
pme3212	Quercetin 3-O-glucoside (Isotrifoliin)	Flavonol	684000	739000	713000	2050000	3590000	3040000	1.25535	4.06367	2.02278
pme3268	Kaempferol 3-O-galactoside (Trifolin)	Flavonol	1340000	1440000	1680000	17900000	36800000	35900000	1.27521	20.3139	4.3444
pme3290	3,7-Di-O-methylquercetin	Flavonol	9	9	5920	8360	233000	10400	0.993307	42.3981	5.40593
pme3297	Kaempferol 3-O-rhamnoside (Kaempferin)	Flavonol	9	9	9	560000	1240000	855000	1.29237	98333.3	16.5854
pme3369	Rhamnetin (7-O-methxyl quercetin)	Flavonol	9	9	3260	4020	458000	5150	0.975596	142.517	7.15499
pme3396	Fustin	Flavonol	20000000	14200000	13500000	15300000	11800000	7600000	0.751362	0.727463	-0.459054
pme3401	Syringetin	Flavonol	9	9	9	4230	309000	9	0.869448	11601.4	13.502
pme3468	Kaempferol-3-O-robinoside-7-O-rhamnoside (Robinin)	Flavonol	1480	9	9	39800	88600	62300	1.16629	127.303	6.99212
pme3484	Myricetin 3-O-galactoside	Flavonol	9	9	9	804000	443000	435000	1.293	62296.3	15.9269
pme3514	Morin	Flavonol	2560000	5610000	9090000	36000000	26500000	27200000	1.18586	5.19699	2.37768
pma6561	Caffeic acid O-glucoside	Hydroxycinnamoyl derivatives	1470000	2130000	1510000	979000	1010000	994000	1.17649	0.583757	-0.776559
pmb0108	Feruloyl syringic acid	Hydroxycinnamoyl derivatives	3030000	1580000	2240000	277000	321000	345000	1.26758	0.137664	-2.86077
pmb0423	Hydroxy-methoxycinnamate	Hydroxycinnamoyl derivatives	2550000	4110000	1130000	331000	311000	217000	1.20731	0.11027	-3.18089
pmb0475	Gallic acid O-feruloyl-O-hexosyl-O-hexoside	Hydroxycinnamoyl derivatives	9	64900	127000	87800	99000	117000	0.589059	1.58304	0.662699
pmb0478	Coumarin O-rutinoside	Hydroxycinnamoyl derivatives	195000	131000	151000	403000	250000	220000	1.03919	1.83019	0.871992
pmb2620	3,4-Dimethoxycinnamic acid	Hydroxycinnamoyl derivatives	1580000	3930000	608000	265000	319000	354000	1.07009	0.153318	-2.7054
pmb2795	4-Methoxycinnamic acid	Hydroxycinnamoyl derivatives	164000	916000	110000	302000	282000	229000	0.0561819	0.683193	-0.549634
pmb2933	Caftaric acid	Hydroxycinnamoyl derivatives	3670000	990000	1580000	1920000	3650000	907000	0.0384288	1.03798	0.0537797
pmb3110	Vanillic acid	Hydroxycinnamoyl derivatives	31000	40800	33200	26900	43100	44700	0.238507	1.09238	0.127476
pme0299	Cinnamic acid	Hydroxycinnamoyl derivatives	3010	24600	30700	35600	73600	51900	0.853903	2.76282	1.46614
pme0305	Ferulic acid	Hydroxycinnamoyl derivatives	449000	754000	408000	325000	433000	386000	0.775354	0.710118	-0.493869
pme0307	Resveratrol	Hydroxycinnamoyl derivatives	29700	57400	24400	61900	31300	39200	0.384317	1.18744	0.247859
pme0387	Homovanillic acid	Hydroxycinnamoyl derivatives	10700	9	11200	29700	18600	34300	0.731442	3.77014	1.91462
pme0408	Syringic acid	Hydroxycinnamoyl derivatives	1200000	3910000	3820000	546000	1500000	2030000	0.755172	0.456439	-1.13151
pme0422	3-Hydroxy-4-methoxycinnamic acid	Hydroxycinnamoyl derivatives	525000	904000	477000	394000	472000	463000	0.794435	0.697272	-0.520207
pme0424	trans-cinnamaldehyde	Hydroxycinnamoyl derivatives	30300	29600	30900	22700	21600	19000	1.23915	0.697137	-0.520487
pme0429	3,4,5-Trimethoxycinnamic acid	Hydroxycinnamoyl derivatives	28900	33500	24100	41300	28900	35100	0.744049	1.21734	0.283733
pme1424	Coniferylaldehyde	Hydroxycinnamoyl derivatives	241000	308000	251000	270000	228000	262000	0.323235	0.95	-0.0740006
pme1434	Syringin	Hydroxycinnamoyl derivatives	393000	904000	692000	291000	254000	233000	1.12326	0.391151	-1.3542
pme1436	p-Coumaric acid	Hydroxycinnamoyl derivatives	558000	393000	102000	713000	344000	275000	0.389715	1.26496	0.339089
pme1637	Coniferyl alcohol	Hydroxycinnamoyl derivatives	405000	280000	190000	406000	296000	254000	0.289562	1.09257	0.127728
pme1646	Pinoresinol	Hydroxycinnamoyl derivatives	204000	169000	188000	491000	341000	348000	1.22074	2.10339	1.07271
pme2213	Caffeic acid	Hydroxycinnamoyl derivatives	10700	13200	9	54800	93700	62600	0.84865	8.82931	3.1423
pme3245	Medicarpin	Hydroxycinnamoyl derivatives	23700	22300	25100	133000	18500	16400	0.345501	2.36146	1.23968
pme3246	Coniferin	Hydroxycinnamoyl derivatives	1760000	6020000	2600000	884000	813000	373000	1.11486	0.199422	-2.3261
pme3446	Sinapinaldehyde	Hydroxycinnamoyl derivatives	90600	85500	60800	32600	28000	21500	1.22763	0.34656	-1.52882
pme3456	p-Coumaraldehyde	Hydroxycinnamoyl derivatives	309000	632000	512000	521000	764000	352000	0.227238	1.12663	0.17202
pme3459	Caffeyl alcohol	Hydroxycinnamoyl derivatives	9	9	9	1160000	228000	109000	1.28276	55444.4	15.7588
pmb0812	Imidazole-4-acetate	Indole derivatives	315000	784000	1200000	562000	725000	519000	0.182828	0.785559	-0.348209
pmb0813	1-Methoxyindole-3-carbaldehyde	Indole derivatives	97600	61700	61000	22600	9	9	0.996574	0.102669	-3.28393
pmb0818	Methoxyindoleacetic acid	Indole derivatives	6330000	7760000	5900000	5650000	4800000	4490000	1.0379	0.747374	-0.420098
pmb0819	3-Indoleacetonitrile	Indole derivatives	1130000	1390000	1230000	1240000	481000	386000	0.900771	0.561867	-0.8317
pmb1096	Indole	Indole derivatives	1910000	2340000	1870000	1640000	1330000	1280000	1.11934	0.694444	-0.526069
pme0543	Indole-5-carboxylic acid	Indole derivatives	9	9	9	82000	40400	29200	1.29067	5614.81	12.455
pme2244	3-Indolepropionic acid	Indole derivatives	156000	52900	150000	267000	1400000	335000	0.998565	5.57816	2.47979
pme2607	5-Hydroxyindole-3-acetic acid	Indole derivatives	1750000	1380000	2130000	706000	537000	1470000	0.970592	0.515779	-0.955174
pme2723	Indole-3-carboxaldehyde	Indole derivatives	388000	625000	415000	1010000	227000	179000	0.328178	0.991597	-0.0121747
pme1568	Orobol (5,7,3',4'-tetrahydroxyisoflavone)	Isoflavone	18900	36100	16100	48000	27400	26700	0.685743	1.43601	0.522061
pme3208	Glycitin	Isoflavone	10800	16400	12900	10600	8350	11500	0.848605	0.759352	-0.39716
pme3209	Genistein 7-O-Glucoside (Genistin)	Isoflavone	1250000	1190000	741000	1800000	1380000	1100000	0.739488	1.34549	0.42813
pme3233	Calycosin	Isoflavone	132000	164000	96000	78600	83800	109000	0.892957	0.692347	-0.530433
pme3250	Biochanin A	Isoflavone	9	9	9	24600	2610000	9	0.878754	97578.1	16.5743
pme3279	2'-Hydroxygenistein	Isoflavone	785000	1250000	907000	1500000	681000	1040000	0.147844	1.09483	0.130711
pme3292	Prunetin	Isoflavone	20100	10400	9720	32800	5080000	68300	0.863537	128.819	7.0092
pme3451	Rotenone	Isoflavone	103000	155000	123000	38400	9	29100	0.764524	0.177189	-2.49664
pma0461	14,15-Dehydrocrepenynic acid	Lipids_Fatty acids	297000	850000	562000	13600000	3300000	3130000	1.16044	11.7203	3.55094
pma3606	9-Hydroxy-(10E,12Z,15Z)-octadecatrienoic acid	Lipids_Fatty acids	494000	1280000	877000	9160000	3800000	949000	0.892523	5.2467	2.39141
pmb0889	Punicic acid	Lipids_Fatty acids	3080000	9300000	4850000	85300000	44800000	8330000	0.989067	8.03424	3.00616
pmb1650	Octadeca-11E,13E,15Z-trienoic acid	Lipids_Fatty acids	1230000	1150000	1580000	1430000	1380000	1450000	0.49917	1.07576	0.105353
pmb2221	4-Hydroxysphinganine	Lipids_Fatty acids	28000000	26500000	34200000	46100000	26400000	37600000	0.622809	1.24126	0.311808
pmb2640	Lauric acid (C12:0)	Lipids_Fatty acids	12800	16000	17400	18700	15200	16400	0.488219	1.08874	0.122666
pmb2643	Myristoleic acid (C14:1)	Lipids_Fatty acids	86300	80700	87200	71400	86900	64800	0.791225	0.877655	-0.188274
pmb2778	9,10-EODE	Lipids_Fatty acids	1030000	3890000	2160000	44200000	23100000	3900000	1.00831	10.0565	3.33006
pmb2786	9-HOTrE	Lipids_Fatty acids	16100	51000	32200	843000	207000	200000	1.16548	12.5881	3.65399
pmb2787	9-KODE	Lipids_Fatty acids	10500	37200	21500	302000	128000	83600	1.14351	7.42197	2.8918
pmb2789	13-HpOTrE(r)	Lipids_Fatty acids	67000	121000	127000	581000	177000	204000	0.987353	3.05397	1.61069
pmb2791	9-HpOTrE	Lipids_Fatty acids	55700	93600	102000	546000	164000	161000	1.00672	3.46598	1.79326
pmb2792	13-HOTrE(r)	Lipids_Fatty acids	174000	230000	247000	176000	188000	435000	0.254861	1.22734	0.295538
pmb2799	12,13-EODE	Lipids_Fatty acids	124000	357000	246000	1540000	1560000	270000	0.927908	4.63549	2.21272
pmb2804	13-HPODE	Lipids_Fatty acids	118000	344000	225000	5840000	1950000	193000	0.848853	11.6201	3.53855
pmb5304	α-Linolenic acid	Lipids_Fatty acids	6470	25400	19900	68400	37400	43500	1.01976	2.88391	1.52803
pme2827	Palmitaldehyde	Lipids_Fatty acids	4180000	5960000	3170000	4310000	3690000	2090000	0.580559	0.758077	-0.399584
pmb0149	MAG (18:4) isomer1	Lipids_Glycerolipids	9	8090	9	9	9190	8990	0.437802	2.24334	1.16565
pmb0159	DGMG (18:2) isomer2	Lipids_Glycerolipids	52500	134000	581000	118000	125000	167000	0.158097	0.534202	-0.904543
pmb0160	MAG (18:3) isomer5	Lipids_Glycerolipids	1890000	3710000	20600000	2970000	3430000	4040000	0.367658	0.398473	-1.32745
pmb0161	DGMG (18:2) isomer1	Lipids_Glycerolipids	1040000	2640000	9580000	1390000	1620000	1770000	0.569914	0.360483	-1.472
pmb0163	DGMG (18:2) isomer3	Lipids_Glycerolipids	1130000	2520000	8970000	1550000	1640000	1820000	0.55558	0.396989	-1.33283
pmb0164	MAG (18:2) isomer1	Lipids_Glycerolipids	56300	188000	149000	175000	213000	248000	0.786051	1.61709	0.693397
pmb0287	MAG (18:4) isomer2	Lipids_Glycerolipids	359000	440000	286000	257000	297000	314000	0.785485	0.8	-0.321928
pmb0296	MAG (18:1) isomer2	Lipids_Glycerolipids	667000	2200000	2960000	1570000	868000	1320000	0.37439	0.644929	-0.632788
pmb0890	MAG (18:2)	Lipids_Glycerolipids	16200000	22400000	26000000	19000000	20600000	17100000	0.467242	0.877709	-0.188185
pmb1562	MAG (18:4) isomer3	Lipids_Glycerolipids	36600	107000	111000	553000	105000	166000	0.834344	3.23645	1.69441
pmb1605	MAG (18:3) isomer3	Lipids_Glycerolipids	2740000	5350000	27200000	4190000	4450000	5680000	0.400389	0.405781	-1.30123
pmb1626	MGMG (18:2) isomer1	Lipids_Glycerolipids	668000	2040000	1820000	828000	965000	1430000	0.410012	0.711793	-0.49047
pmb1656	MAG (18:3) isomer4	Lipids_Glycerolipids	319000	666000	942000	4380000	1110000	1280000	0.942531	3.51323	1.8128
pmb2251	DGMG (18:1)	Lipids_Glycerolipids	867000	1610000	8360000	1560000	2020000	2370000	0.144681	0.549045	-0.865004
pmb2325	MAG (18:3) isomer2	Lipids_Glycerolipids	631000	1210000	6430000	1250000	1310000	1850000	0.152083	0.533188	-0.907283
pmb2363	MAG (18:1) isomer1	Lipids_Glycerolipids	948000	1450000	11600000	557000	434000	433000	0.950665	0.101729	-3.2972
pmb2383	MGMG (18:2) isomer2	Lipids_Glycerolipids	809000	1580000	4550000	792000	792000	1110000	0.736161	0.38824	-1.36498
pmb2444	MAG (18:3) isomer1	Lipids_Glycerolipids	331000	1520000	1100000	9650000	1630000	2320000	0.905965	4.60861	2.20433
pmb0848	LysoPC 16:1 (2n isomer)	Lipids_Glycerophospholipids	16900000	21200000	53800000	33600000	61400000	29600000	0.531987	1.35582	0.439167
pmb0852	LysoPC 18:2	Lipids_Glycerophospholipids	2290000	3480000	3370000	4820000	5600000	5360000	1.15248	1.72648	0.787831
pmb0854	LysoPC 18:3	Lipids_Glycerophospholipids	9430000	19000000	12800000	37400000	31100000	38200000	1.18812	2.58792	1.37179
pmb0855	LysoPC 16:0	Lipids_Glycerophospholipids	2100000	4630000	2700000	14100000	11000000	13600000	1.22668	4.10392	2.037
pmb0856	LysoPE 18:1 (2n isomer)	Lipids_Glycerophospholipids	5340000	12100000	24400000	5510000	6040000	5290000	0.829687	0.402486	-1.31299
pmb0859	LysoPC 18:1 (2n isomer)	Lipids_Glycerophospholipids	2510000	5890000	10400000	4850000	5730000	6430000	0.0715051	0.904787	-0.14435
pmb0862	LysoPC 12:1	Lipids_Glycerophospholipids	38800	31400	26200	152000	182000	151000	1.2779	5.03112	2.33088
pmb0863	LysoPC 16:2 (2n isomer)	Lipids_Glycerophospholipids	68300000	36100000	152000000	10500000	17900000	15700000	1.13514	0.171997	-2.53955
pmb0864	LysoPE 14:0	Lipids_Glycerophospholipids	2760000	3690000	4170000	19000000	10100000	14700000	1.23472	4.12429	2.04415
pmb0865	LysoPC 18:3 (2n isomer)	Lipids_Glycerophospholipids	446000	1170000	2600000	1330000	2220000	1890000	0.518386	1.29032	0.367732
pmb0866	LysoPC 14:0	Lipids_Glycerophospholipids	2120000	2940000	2660000	24100000	12500000	18600000	1.26437	7.15026	2.838
pmb0873	LysoPC 18:2 (2n isomer)	Lipids_Glycerophospholipids	2700000	4940000	6070000	2650000	3260000	2910000	0.799484	0.643326	-0.636378
pmb0874	LysoPE 18:2 (2n isomer)	Lipids_Glycerophospholipids	7780000	10900000	12300000	8620000	10200000	9080000	0.384402	0.900581	-0.151072
pmb0877	LysoPE 18:1	Lipids_Glycerophospholipids	12300000	28900000	53100000	11700000	12700000	11100000	0.896589	0.376458	-1.40944
pmb0880	LysoPE 18:0 (2n isomer)	Lipids_Glycerophospholipids	7440	11400	13800	95700	158000	156000	1.26861	12.5521	3.64985
pmb0882	LysoPC 18:1	Lipids_Glycerophospholipids	5290000	9610000	11500000	26500000	29600000	27600000	1.20184	3.17045	1.66469
pmb0883	LysoPE 18:0	Lipids_Glycerophospholipids	3560000	4050000	3570000	8140000	6710000	10100000	1.2342	2.23166	1.15812
pmb2165	LysoPC 10:0	Lipids_Glycerophospholipids	24800	16600	12700	52100	52200	71600	1.21602	3.25139	1.70105
pmb2228	LysoPC 19:0	Lipids_Glycerophospholipids	134000	48300	120000	202000	62100	48900	0.0895358	1.0354	0.0501817
pmb2260	LysoPC 15:1	Lipids_Glycerophospholipids	749000	623000	746000	283000	244000	393000	1.21616	0.434372	-1.203
pmb2319	LysoPC 15:0	Lipids_Glycerophospholipids	4000000	10100000	2840000	11000000	8390000	12700000	0.904773	1.89433	0.92169
pmb2369	PC 19:2/16:0	Lipids_Glycerophospholipids	16600	62700	29200	303000	224000	298000	1.21466	7.60369	2.9267
pmb2388	LysoPC 18:0 (2n isomer)	Lipids_Glycerophospholipids	5720000	13500000	25700000	10900000	13100000	13300000	0.0270914	0.830365	-0.268182
pmb2406	LysoPC 17:0	Lipids_Glycerophospholipids	8000000	12000000	6350000	19000000	19100000	27400000	1.16868	2.48577	1.31369
pmb3117	LysoPE 16:0	Lipids_Glycerophospholipids	20500000	27200000	28200000	119000000	89200000	108000000	1.2725	4.16601	2.05867
pmc0960	LysoPC 20:4	Lipids_Glycerophospholipids	13500000	29900000	55600000	16800000	19000000	19400000	0.602257	0.557576	-0.84276
pmd0130	LysoPC 14:0 (2n isomer)	Lipids_Glycerophospholipids	2800000	3920000	3430000	32800000	18000000	26800000	1.26945	7.64532	2.93458
pmd0132	LysoPC 16:0 (2n isomer)	Lipids_Glycerophospholipids	2200000	4870000	2920000	13900000	11200000	13600000	1.22318	3.87387	1.95378
pmd0136	LysoPC 18:0	Lipids_Glycerophospholipids	4550000	6370000	5140000	16900000	17300000	26400000	1.2501	3.77335	1.91585
pmd0144	LysoPC 20:1 (2n isomer)	Lipids_Glycerophospholipids	1600000	5110000	7690000	2470000	2690000	2450000	0.562313	0.528472	-0.9201
pmd0145	LysoPC 20:1	Lipids_Glycerophospholipids	2090000	5330000	9720000	2460000	2750000	2330000	0.756014	0.439907	-1.18473
pmd0158	LysoPE 14:0 (2n isomer)	Lipids_Glycerophospholipids	52000	83900	153000	210000	116000	191000	0.860953	1.78955	0.839594
pmd0160	LysoPE 16:0 (2n isomer)	Lipids_Glycerophospholipids	36900000	47500000	47100000	192000000	150000000	176000000	1.27766	3.93916	1.97789
pma1751	Nicotinic acid-hexoside	Nicotinic acid derivatives	10000000	40200000	15400000	12800000	14700000	15900000	0.363088	0.661585	-0.596001
pma3101	Nicotinate ribonucleoside	Nicotinic acid derivatives	5970000	5280000	10100000	4890000	6950000	5840000	0.436755	0.828103	-0.272118
pme0491	6-hydroxynicotinic acid	Nicotinic acid derivatives	1390000	508000	714000	636000	882000	616000	0.251756	0.816998	-0.291595
pme0496	Nicotinic acid	Nicotinic acid derivatives	212000	131000	232000	402000	227000	374000	0.95983	1.74435	0.802688
pmb0197	N2-methylguanosine	Nucleotide and its derivates	1850000	989000	1540000	7730000	4360000	7100000	1.22345	4.38228	2.13168
pmb0530	Nicotinic acid adenine dinucleotide	Nucleotide and its derivates	1050000	1020000	365000	4040000	4220000	4890000	1.20523	5.40041	2.43307
pmb0964	iP7G	Nucleotide and its derivates	2980000	4810000	5000000	432000	723000	1100000	1.2201	0.17631	-2.50382
pmb0998	Guanosine 5'-monophosphate	Nucleotide and its derivates	967000	583000	413000	3510000	2140000	2430000	1.20534	4.11615	2.0413
pmb2684	Cyclic AMP	Nucleotide and its derivates	38800	34600	57500	441000	570000	1350000	1.24965	18.0367	4.17286
pmb2922	Uridine 5'-diphospho-D-glucose	Nucleotide and its derivates	14300000	12300000	8510000	66000000	45300000	35500000	1.22886	4.18114	2.0639
pmb2948	Adenosine 3'-monophosphate	Nucleotide and its derivates	182000	167000	165000	1600000	1690000	1570000	1.29295	9.45525	3.24112
pmb2952	2'-Deoxyinosine	Nucleotide and its derivates	9	9	9	47100	18100	195000	1.27828	9637.04	13.2344
pmc0066	2'-Deoxyinosine-5'-monophosphate	Nucleotide and its derivates	19900	16100	9	57800	89400	55800	0.78387	5.63748	2.49505
pmc0274	6-Methylmercaptopurine	Nucleotide and its derivates	6260000	8170000	8400000	21600000	27100000	28600000	1.26522	3.3859	1.75954
pmc0281	Adenosine O-ribose	Nucleotide and its derivates	5670000	5030000	6650000	6480000	7340000	4420000	0.124197	1.0513	0.0721701
pmc0304	Succinyladenosine	Nucleotide and its derivates	775000	1270000	816000	7230000	2500000	4140000	1.17974	4.84796	2.27738
pme0005	Purine	Nucleotide and its derivates	9	9	9	3720000	5840000	4590000	1.29329	524074	18.9994
pme0031	Thymine	Nucleotide and its derivates	9	1590000	9	1310000	1720000	1330000	0.90951	2.74211	1.45529
pme0033	Hypoxanthine	Nucleotide and its derivates	316000	950000	554000	933000	630000	830000	0.606374	1.31484	0.394882
pme0038	Cytosine	Nucleotide and its derivates	231000	162000	209000	456000	513000	657000	1.23766	2.701	1.43349
pme0040	Adenine	Nucleotide and its derivates	13900000	29300000	17900000	58200000	42300000	58700000	1.16245	2.60556	1.3816
pme0108	5-Methylcytosine	Nucleotide and its derivates	262000	232000	506000	506000	348000	512000	0.70849	1.366	0.449957
pme0130	3-Methylxanthine	Nucleotide and its derivates	96800	51600	32000	35900	42200	36600	0.614618	0.635809	-0.653334
pme0183	2-Hydroxy-6-aminopurine	Nucleotide and its derivates	1410000	375000	1130000	2090000	2890000	2510000	1.01931	2.56947	1.36147
pme0230	Adenosine	Nucleotide and its derivates	2480000	3250000	2660000	31400000	23900000	34600000	1.28554	10.7151	3.42158
pme0256	Xanthine	Nucleotide and its derivates	669000	1550000	865000	992000	879000	941000	0.0761256	0.911803	-0.133206
pme0258	Uracil	Nucleotide and its derivates	2180000	2220000	2810000	6460000	4750000	7060000	1.23455	2.53398	1.34141
pme0263	5-Methyluridine	Nucleotide and its derivates	228000	136000	249000	893000	650000	1390000	1.21218	4.78467	2.25842
pme0264	Thymidine	Nucleotide and its derivates	346000	167000	567000	748000	1270000	2140000	1.06823	3.85	1.94486
pme1063	Uridine	Nucleotide and its derivates	1420000	1600000	2430000	6850000	7360000	8480000	1.25655	4.1633	2.05773
pme1109	Guanine	Nucleotide and its derivates	46100000	15700000	49800000	157000000	113000000	130000000	1.13151	3.58423	1.84166
pme1119	Inosine	Nucleotide and its derivates	76000	40600	59400	405000	798000	763000	1.25788	11.1705	3.48162
pme1175	Guanosine	Nucleotide and its derivates	11000000	1950000	14900000	55100000	26300000	50100000	1.03745	4.72172	2.23931
pme1184	Deoxyguanosine	Nucleotide and its derivates	3130000	2310000	3980000	19200000	13200000	27100000	1.2444	6.31635	2.65909
pme1194	Deoxycytidine	Nucleotide and its derivates	66700	65400	73300	220000	209000	259000	1.28414	3.34956	1.74397
pme1294	Xanthosine	Nucleotide and its derivates	17500000	42500000	47800000	65300000	38600000	56700000	0.708326	1.4898	0.575115
pme1346	8-Hydroxyguanosine	Nucleotide and its derivates	2530000	1130000	886000	999000	445000	1060000	0.708458	0.550814	-0.860363
pme1376	2'-Deoxycytidine-5'-monophosphate	Nucleotide and its derivates	1300000	1110000	598000	1550000	1680000	1550000	0.951383	1.5891	0.668206
pme1378	1-Methyladenosine	Nucleotide and its derivates	31100	36400	36500	279000	194000	309000	1.2798	7.51923	2.91059
pme1474	5'-Deoxy-5'-(methylthio)adenosine	Nucleotide and its derivates	1970000	1320000	1620000	5190000	5140000	5380000	1.26943	3.19959	1.67789
pme1692	Inosine 5'-monophosphate	Nucleotide and its derivates	175000	148000	160000	1280000	1110000	939000	1.28682	6.89234	2.78499
pme2278	Guanosine monophosphate	Nucleotide and its derivates	315000	127000	229000	1630000	1190000	950000	1.22216	5.61848	2.49018
pme2555	Adenosine 5'-monophosphate	Nucleotide and its derivates	2220000	1790000	2010000	14600000	14200000	11000000	1.28511	6.6113	2.72493
pme2746	Flavin adenine dinucleotide (FAD)	Nucleotide and its derivates	1000000	600000	478000	2290000	3670000	4780000	1.2127	5.16843	2.36973
pme2798	7-Methylxanthine	Nucleotide and its derivates	713000	367000	241000	254000	342000	282000	0.558403	0.664648	-0.589338
pme3007	Uridine 5’-diphosphate	Nucleotide and its derivates	145000	152000	84300	965000	684000	698000	1.25983	6.15526	2.62182
pme3104	1-Methyladenine	Nucleotide and its derivates	672000	471000	846000	1940000	1850000	1650000	1.22298	2.73504	1.45156
pme3184	2'-Deoxyadenosine-5'-monophosphate	Nucleotide and its derivates	1880000	9	760000	7050000	4910000	7650000	0.750002	7.428	2.89297
pme3188	Uridine 5'-monophosphate	Nucleotide and its derivates	1130000	1210000	1050000	8160000	6660000	7800000	1.29033	6.67257	2.73824
pme3337	N6-Succinyl Adenosine	Nucleotide and its derivates	15900000	27700000	16200000	122000000	40800000	68900000	1.12918	3.87458	1.95404
pme3349	8-Hydroxy-2-deoxyguanosine	Nucleotide and its derivates	15300	9	20800	65200	31900	60600	0.742275	4.36733	2.12675
pme3732	Cytidine	Nucleotide and its derivates	410000	359000	630000	1680000	1900000	2160000	1.25176	4.10293	2.03665
pme3835	Guanosine 3',5'-cyclic monophosphate	Nucleotide and its derivates	3910000	2550000	7040000	13500000	5740000	10700000	0.940621	2.21778	1.14911
pme3960	Deoxyadenosine	Nucleotide and its derivates	5720	2910	12300	51900	26200	80000	1.15495	7.55375	2.91719
pme3965	2-(dimethylamino)guanosine	Nucleotide and its derivates	717000	245000	654000	1110000	527000	836000	0.663478	1.53032	0.613835
pme3968	7-methylguanine	Nucleotide and its derivates	135000	252000	104000	9	201000	204000	0.541544	0.824866	-0.277769
pme3970	β-Pseudouridine	Nucleotide and its derivates	832000	692000	1440000	195000	176000	183000	1.24886	0.18691	-2.41959
pme3982	Hypoxanthine-9-β-D-arabinofuranoside	Nucleotide and its derivates	225000	249000	546000	4270000	3590000	7140000	1.25292	14.7059	3.87832
pma0149	Sinapoyl malate	Organic acids	285000	136000	311000	223000	430000	219000	0.331483	1.19126	0.252484
pma0675	o-Anisic acid	Organic acids	60900	91000	77300	9	9	9	1.29331	0.000117801	-13.0514
pma2681	Xanthurenic acid	Organic acids	41800	47500	52100	9	64100	111000	0.488722	1.23839	0.308471
pma3649	5-Aminolevulinate	Organic acids	5200000	4630000	7100000	9140000	18300000	15500000	1.13433	2.53633	1.34274
pma6281	Methylglutaric acid	Organic acids	30600	20800	34900	133000	117000	130000	1.26521	4.40324	2.13857
pmb0829	Phosphoric acid	Organic acids	2510000	2090000	4480000	3770000	3650000	4060000	0.680308	1.26432	0.338358
pmb2497	4-Hydroxy-3-methoxymandelate	Organic acids	123000	121000	135000	239000	181000	231000	1.22203	1.71768	0.78046
pmb2657	Argininosuccinate	Organic acids	47700	64600	63200	262000	197000	187000	1.26363	3.68091	1.88006
pmb2826	Citramalate	Organic acids	1500000	1930000	2440000	4530000	5040000	2600000	1.05692	2.07325	1.0519
pmb2867	Kynurenic acid O-hexside	Organic acids	4900	9	9	9	9	7590	0.0339412	1.54697	0.629446
pmb3099	Diethyl phosphate	Organic acids	644000	396000	708000	1480000	409000	545000	0.299608	1.39245	0.477624
pmb3101	2-Isopropylmalate	Organic acids	12400000	15000000	14100000	8730000	3110000	4380000	1.10695	0.390843	-1.35534
pme0024	2-Aminoethanesulfonic acid	Organic acids	9	29900	68700	76700	54400	87900	0.643776	2.22089	1.15114
pme0085	Rosmarinic acid	Organic acids	57100	227000	60400	112000	107000	66000	0.00504655	0.827286	-0.273542
pme0207	3-Hydroxybutyrate	Organic acids	9	290000	167000	1670000	1010000	3680000	0.81122	13.9166	3.79873
pme0234	Kynurenic acid	Organic acids	5230000	496000	2160000	4760000	33000000	30500000	0.993534	8.65585	3.11367
pme0237	Ethyl 3,4-Dihydroxybenzoate (Ethyl protocatechuate)	Organic acids	65300	116000	57400	38700	27600	40600	1.08453	0.447842	-1.15894
pme0243	Glutaric acid	Organic acids	653000	908000	607000	2090000	1190000	2340000	1.14859	2.59225	1.37421
pme0245	Adipic acid	Organic acids	783000	1420000	833000	841000	1280000	944000	0.0845463	1.00955	0.0137153
pme0250	Azelaic Acid	Organic acids	663000	1290000	902000	4550000	2290000	1960000	1.11542	3.08231	1.62401
pme0267	2-Methylsuccinic acid	Organic acids	1610000	1750000	1700000	5200000	4550000	4760000	1.28909	2.86759	1.51984
pme0274	6-Aminocaproic acid	Organic acids	1490000	2460000	1910000	3190000	3230000	4000000	1.13323	1.77816	0.830383
pme0281	Terephthalic acid	Organic acids	692000	743000	743000	679000	569000	577000	1.06521	0.837925	-0.255107
pme0282	Phthalic acid	Organic acids	46400	60800	58000	59400	35200	38200	0.705212	0.803874	-0.314959
pme0284	4-Guanidinobutyric acid	Organic acids	516000	603000	455000	527000	480000	510000	0.224643	0.963787	-0.0532145
pme0286	2-Hydroxyisocaproic acid	Organic acids	19100	24000	17800	54400	66500	86700	1.24973	3.40887	1.76929
pme0289	4-Ethylbenzoic acid	Organic acids	43800	55900	45600	35600	41100	28500	1.01423	0.724019	-0.4659
pme0291	Dl-2-Aminooctanoic acid	Organic acids	136000	226000	246000	1270000	709000	839000	1.2288	4.63487	2.21253
pme0295	4-Acetamidobutyric acid	Organic acids	231000	572000	294000	204000	181000	278000	0.768959	0.604376	-0.726483
pme0397	Shikimic acid	Organic acids	68000	105000	98500	352000	301000	406000	1.25943	3.90055	1.96368
pme0474	4-Hydroxybenzoic acid	Organic acids	1410000	1970000	1520000	799000	818000	510000	1.18672	0.434082	-1.20396
pme0486	Methylmalonic acid	Organic acids	162000000	87200000	95600000	122000000	120000000	137000000	0.413193	1.09919	0.136438
pme1218	2-Picolinic acid	Organic acids	521000	660000	868000	895000	696000	704000	0.458094	1.12006	0.163574
pme1292	Homogentisic acid	Organic acids	105000	120000	82000	102000	121000	76800	0.10703	0.976547	-0.0342383
pme1683	D-Pantothenic dcid	Organic acids	264000	738000	494000	64300	107000	115000	1.18674	0.191377	-2.38551
pme1711	3-Hydroxy-3-methyl butyric acid	Organic acids	192000	296000	262000	1170000	1440000	2370000	1.25024	6.64	2.73118
pme1730	D-Erythronolactone	Organic acids	162000	248000	363000	61600	87800	90400	1.17552	0.31022	-1.68864
pme1820	p–Hydroxyphenyl acetic acid	Organic acids	96600	142000	132000	456000	257000	267000	1.17552	2.64436	1.40292
pme1830	Succinic acid	Organic acids	152000000	89900000	95400000	126000000	114000000	134000000	0.459974	1.10881	0.149006
pme1851	Creatine	Organic acids	3060000	2260000	3670000	8460000	7460000	5450000	1.1822	2.37709	1.24919
pme1936	Creatinine	Organic acids	504000	527000	532000	511000	530000	504000	0.328664	0.988484	-0.0167109
pme2009	L-(+)-Tartaric acid	Organic acids	875000	601000	941000	456000	441000	609000	1.03925	0.623086	-0.682496
pme2033	L(-)-Malic acid	Organic acids	524000000	461000000	533000000	451000000	540000000	401000000	0.555109	0.916996	-0.125013
pme2050	Citric acid	Organic acids	207000000	205000000	209000000	436000000	504000000	379000000	1.26227	2.12399	1.08678
pme2129	(S)-(-)-2-Hydroxyisocaproic acid	Organic acids	142000	159000	151000	463000	540000	717000	1.26812	3.80531	1.92801
pme2277	3-Aminosalicylic acid	Organic acids	102000	57800	101000	617000	254000	355000	1.19349	4.70092	2.23294
pme2362	Mandelic acid	Organic acids	99400	166000	132000	192000	217000	183000	1.03241	1.48968	0.575005
pme2380	A-Ketoglutaric acid	Organic acids	285000	170000	250000	423000	389000	391000	1.12671	1.70638	0.770941
pme2550	Cis-Aconitic acid	Organic acids	9310	25500	21300	81700	82500	88100	1.20337	4.49652	2.16881
pme2589	Oxoadipic acid	Organic acids	57100	58600	55700	104000	159000	154000	1.2323	2.43291	1.28268
pme2598	3,4-Dihydroxybenzeneacetic acid	Organic acids	226000	229000	233000	1900000	639000	596000	1.13588	4.55669	2.18798
pme2706	2,3-Dihydroxybenzoic acid	Organic acids	3580000	2020000	2980000	10800000	12500000	14500000	1.25452	4.40559	2.13934
pme2761	4-Hydroxy-2-oxoglutaric acid	Organic acids	281000	232000	362000	319000	358000	448000	0.800117	1.28571	0.36257
pme3009	trans-Citridic acid	Organic acids	1230000	1240000	874000	563000	641000	599000	1.2004	0.539175	-0.891175
pme3011	γ-aminobutyric acid	Organic acids	221000	176000	96800	385000	427000	599000	1.15208	2.85743	1.51472
pme3034	ethylmalonate	Organic acids	18400	34700	28600	76100	44400	83300	1.11249	2.49449	1.31875
pme3069	Taurocholic acid	Organic acids	2560000	2560000	2440000	2720000	2710000	2620000	1.09435	1.06481	0.0906025
pme3083	2-(Formylamino)benzoic acid	Organic acids	63600	56700	18900	233000	153000	52600	0.888632	3.15086	1.65575
pme3096	Aminomalonic acid	Organic acids	5820000	3080000	3360000	4330000	4080000	4500000	0.293801	1.05302	0.07453
pme3207	trans,trans-Muconic acid	Organic acids	3960000	3950000	4510000	990000	1080000	1490000	1.26682	0.286634	-1.80272
pme3309	2-Methylglutaric acid	Organic acids	662000	1180000	654000	724000	1070000	784000	0.159355	1.03285	0.0466343
pme3346	5-hydroxyhexanoic acid	Organic acids	1680000	2050000	1960000	1300000	477000	666000	1.08349	0.42935	-1.21977
pme3719	D-Xylonic acid	Organic acids	8660000	10200000	10800000	7730000	8010000	9620000	0.828062	0.855024	-0.225964
pma0948	Hydroxyphenethylamine	Others	9	9	9	5300000	7810000	6420000	1.29339	723333	19.4643
pma2987	Histidinol	Others	1610000	1610000	1850000	1500000	1730000	1510000	0.597387	0.934911	-0.0970987
pma6298	3-Hydroxypyridine	Others	33900	50300	50500	41600	34300	42800	0.463744	0.881218	-0.18243
pma6625	E-3,4,5'-Trihydroxy-3'-glucopyranosylstilbene	Others	30700	54600	46800	57300	58900	75200	0.920361	1.4489	0.53496
pmb0069	Benzamide	Others	447000	72600	416000	13000000	28300000	18000000	1.2413	63.3818	5.986
pmb0292	Cholesterol	Others	1730000	733000	1420000	1010000	1500000	1310000	0.071248	0.983775	-0.0235991
pmb0374	Aminopurine	Others	6970000	8750000	8080000	88800000	62600000	99800000	1.28298	10.5546	3.3998
pmb0758	Anisic acid O-feruloyl hexoside	Others	4890000	5510000	5670000	1870000	1460000	1630000	1.28004	0.30865	-1.69596
pmb0764	4-Methyl-5-thiazoleethanol	Others	566000	512000	456000	3060000	4270000	4050000	1.28401	7.41851	2.89113
pmb0766	Azoxystrobin acid	Others	3730000	3470000	4130000	3650000	3480000	2230000	0.700138	0.826125	-0.275567
pmb0767	D-erythro-Dihydrosphingosine	Others	73300	68400	82000	105000	89000	74200	0.788809	1.19893	0.261744
pmb1240	Phellodensin F	Others	15900000	11100000	9580000	2380000	2650000	1540000	1.25152	0.179606	-2.47709
pmb1452	N-Lauryldiethanolamine	Others	2270000	2290000	2580000	2940000	2500000	2650000	0.91109	1.13305	0.180216
pmb1652	Phthalic anhydride	Others	4120000	3670000	4950000	3450000	3600000	3530000	0.923944	0.830455	-0.268026
pmb1912	10-Formyl-THF	Others	13200000	9630000	8200000	29000000	14300000	15500000	0.981162	1.89494	0.922152
pmb2211	Cocamidopropyl betaine	Others	3490000	2820000	3090000	2320000	3680000	2560000	0.442283	0.910638	-0.13505
pmb2556	Syringaldehyde O-glucoside	Others	1190000	2370000	394000	616000	411000	647000	0.651931	0.423369	-1.24001
pmb3079	N-Acetylglucosamine 1-phosphate	Others	184000	430000	542000	52600	67400	9	0.807406	0.103814	-3.26793
pme0516	Inositol	Others	3890000	3150000	4800000	6470000	6730000	7770000	1.17465	1.77111	0.824658
pme1011	Benzamidine	Others	9	9	9	1540000	2320000	1950000	1.29331	215185	17.7152
pme1163	lactucopicrin	Others	11600	21100	60600	48800	60400	85400	0.874696	2.08574	1.06056
pme2108	L-Carnitine	Others	125000	98200	112000	110000	86000	106000	0.580257	0.900955	-0.150474
pme2246	Ellagic acid	Others	4240000	11700000	4620000	25600000	16600000	17300000	1.10538	2.89397	1.53305
pme2366	Phenethylamine	Others	358000	68400	279000	11100000	23800000	15900000	1.25372	72.0159	6.17024
pme2367	Quinone	Others	587000	768000	830000	2020000	1140000	1050000	1.03996	1.92677	0.946187
pme2444	Salvianolic acid	Others	3490	5870	3520	2650	2460	4040	0.758906	0.710404	-0.493289
pme2591	5,6-Dimethylbenzimidazole	Others	104000	159000	169000	9	9	9	1.29317	6.25e-05	-13.9658
pme2651	NADP	Others	208000	110000	132000	353000	347000	566000	1.1697	2.81333	1.49228
pme2828	4-Nitrophenol	Others	11500000	11800000	8390000	7890000	8410000	8030000	0.969297	0.76775	-0.381291
pme2830	O-Phosphorylethanolamine	Others	146000	103000	93200	232000	104000	220000	0.787995	1.62478	0.700245
pme2831	1,1-Dimethylbiguanide	Others	110000	45300	97700	174000	181000	155000	1.04264	2.01581	1.01136
pme3081	4-(Aminomethyl)-5-(hydroxymethyl)-2-methylpyridin-3-ol	Others	86100	92000	127000	469000	730000	1800000	1.20564	9.82956	3.29713
pma0584	N-Caffeoylspermidine	Phenolamides	100000	50100	40500	284000	181000	291000	1.18803	3.96642	1.98784
pma0692	N', N''-di-p-coumaroylspermidine	Phenolamides	9	9	9	8770000	15000000	11900000	1.29322	1.32111e+06	20.3333
pma0702	N', N''-disinapoylspermidine	Phenolamides	9	90600	9	9	9	9	0.577844	0.000297954	-11.7126
pmb0130	N-Acetyl tryptamine	Phenolamides	9	9	19200	74200	9	39000	0.501623	5.89078	2.55846
pmb0490	N-p-Coumaroyl putrescine	Phenolamides	9	9	98700	1310000	2880000	3380000	1.0744	76.6831	6.26084
pmb0492	N',N",N"'-p-coumaroyl-cinnamoyl-caffeoyl spermidine	Phenolamides	2030000	3050000	1930000	36900000	23100000	25000000	1.27743	12.1255	3.59998
pmb0500	N',N"-p-coumaroyl-feruloyl putrescine	Phenolamides	9	9	9	85200	887000	676000	1.28051	61044.4	15.8976
pmb0501	Agmatine	Phenolamides	492000	444000	461000	996000	1060000	885000	1.27642	2.10523	1.07397
pmb0502	N-p-Coumaroyl spermidine	Phenolamides	9	9	39300	888000	1750000	1620000	1.09998	108.296	6.75884
pmb0505	N'-p-Coumaroyl putrescine	Phenolamides	2450000	2070000	927000	10500000	51800000	34200000	1.19645	17.7162	4.147
pmb4486	Hordatine B	Phenolamides	21500	16700	23200	6540	10100	11700	1.15595	0.461564	-1.1154
pmd0017	Spermine	Phenolamides	5710000	5610000	5740000	5230000	5790000	5470000	0.651391	0.966589	-0.0490262
pme1841	1,5-Diaminopentane	Phenolamides	667000	729000	643000	773000	782000	867000	1.10739	1.18784	0.248337
pme2292	Putrescine	Phenolamides	4510000	2610000	1760000	8960000	4800000	4880000	0.973618	2.0991	1.06977
pme2693	N-Acetylputrescine	Phenolamides	728000	465000	611000	726000	1070000	1210000	1.00879	1.6663	0.736646
pmb0837	Procyanidin A3	Proanthocyanidins	43500000	45300000	46600000	17400000	9950000	7610000	1.22161	0.258198	-1.95345
pme0430	Procyanidin A1	Proanthocyanidins	342000	913000	518000	332000	437000	497000	0.520062	0.714044	-0.485915
pme0432	Procyanidin A2	Proanthocyanidins	1860000	5610000	3130000	927000	2090000	2380000	0.780515	0.509151	-0.973835
pme0434	Procyanidin B2	Proanthocyanidins	494000	569000	546000	335000	336000	289000	1.25518	0.596644	-0.745058
pme0436	Procyanidin B3	Proanthocyanidins	494000	644000	646000	127000	102000	83700	1.27512	0.17528	-2.51226
pme1738	3-Carbamyl-1-methylpyridinium (1-Methylnicotinamide)	Pyridine derivatives	77000000	64700000	55300000	83000000	55400000	60000000	0.00979042	1.00711	0.0102164
pme2594	4-Pyridoxic acid	Pyridine derivatives	2290000	931000	1630000	5380000	8390000	8640000	1.20619	4.61967	2.20779
pme3333	1,4-dihydro-1-Methyl-4-oxo-3-pyridinecarboxamide	Pyridine derivatives	2010000	9	2310000	8330000	6030000	6850000	0.698826	4.90971	2.29564
pma3724	1-O-Feruloyl quinic acid	Quinate and its derivatives	134000	190000	181000	9	172000	18800	0.723705	0.37784	-1.40415
pmb0750	Neochlorogenic acid (5-O-Caffeoylquinic acid)	Quinate and its derivatives	144000	127000	120000	243000	173000	141000	0.912626	1.42455	0.510509
pmb0751	5-O-p-Coumaroyl shikimic acid	Quinate and its derivatives	296000	308000	190000	668000	384000	267000	0.775795	1.66121	0.732234
pmb0752	3-O-Feruloyl quinic acid	Quinate and its derivatives	83200	61000	68700	9	9	9	1.29337	0.00012682	-12.9449
pmb3064	3-O-p-coumaroyl quinic acid O-hexoside	Quinate and its derivatives	21000	26100	26900	8900	8290	7500	1.276	0.333649	-1.5836
pmb3066	5-O-p-coumaroyl shikimic acid O-hexoside	Quinate and its derivatives	51700	39300	48400	9	9	9	1.29343	0.000193687	-12.334
pmb3072	3-O-p-coumaroyl shikimic acid O-hexoside	Quinate and its derivatives	12100	12800	15400	54700	73700	92200	1.26771	5.47395	2.45258
pmb3074	3-O-p-Coumaroyl quinic acid	Quinate and its derivatives	101000	124000	49800	55400	52600	34400	0.897055	0.518195	-0.948433
pmb3075	3-O-p-Coumaroyl shikimic acid	Quinate and its derivatives	20300	27800	19200	105000	52600	36400	1.07181	2.88262	1.52738
pme0398	Chlorogenic acid (3-O-Caffeoylquinic acid)	Quinate and its derivatives	68900	68400	274000	63500	138000	72500	0.293806	0.66618	-0.586015
pme1806	Chlorogenic acid methyl ester	Quinate and its derivatives	67100	87400	84900	37800	42500	48900	1.21712	0.539683	-0.889817
pme2036	Quinic acid	Quinate and its derivatives	4620000	4490000	5580000	17400000	17300000	13800000	1.27448	3.30157	1.72315
MWS4053	Ursolic acid	terpene	465000	357000	707000	277000	118000	198000	1.07873	0.387835	-1.36648
pmb2222	Phytocassane C	Terpenoids	4060000	3730000	5030000	6700000	3800000	5430000	0.608234	1.24259	0.31335
pme0062	Cucurbitacin D	Terpenoids	18100	23200	22300	7000	10300	9	0.741472	0.272154	-1.8775
pme2184	Nomilin	Terpenoids	25100	127000	42600	12200	9	27800	0.727824	0.20549	-2.28286
pme3544	Limonin	Terpenoids	716000	267000	100000	9	9	9	1.28533	2.49307e-05	-15.2917
pmb0426	5-Methoxy-N,N-dimethyltryptamine	Tryptamine derivatives	3310000	4080000	4450000	841000	727000	614000	1.27969	0.184291	-2.43995
pmb0769	N-hexosyl-p-coumaroyl serotonin	Tryptamine derivatives	528000	438000	372000	148000	82500	66800	1.22559	0.222197	-2.17009
pme1417	L-Tryptamine	Tryptamine derivatives	497000	276000	333000	10200000	17900000	13700000	1.28243	37.7939	5.24008
pme2786	N-Acetyl-5-hydroxytryptamine	Tryptamine derivatives	6830000	10800000	9540000	3820000	4370000	4000000	1.2177	0.448657	-1.15632
pmb0789	Pyridoxine O-glucoside	Vitamins	378000	476000	294000	465000	474000	469000	0.811616	1.22648	0.294525
pmb0790	Pyridoxine di-O-hexoside	Vitamins	410000	9	9	9	249000	9	0.0233171	0.607334	-0.719437
pmb0800	Niacinamide	Vitamins	829000	717000	790000	2490000	2490000	2440000	1.29014	3.17637	1.66738
pmb0801	4-Pyridoxic acid O-hexoside	Vitamins	454000	1100000	2080000	889000	223000	918000	0.531836	0.558613	-0.840079
pmb0802	D-Pantothenic acid	Vitamins	5180000	7610000	6890000	2670000	3430000	3770000	1.18197	0.501524	-0.995608
pmb2648	Thiamine	Vitamins	51200	43000	54600	29900	52600	54700	0.340684	0.922043	-0.117094
pme1306	Pyridoxine 5'-phosphate	Vitamins	272000	259000	269000	751000	358000	992000	1.06739	2.62625	1.393
pme1383	Pyridoxine	Vitamins	82500	72600	68300	286000	343000	405000	1.27922	4.62847	2.21054
pme1709	Nicotinic Acid Methyl Ester (Methyl Nicotinate)	Vitamins	1240000	2340000	2530000	2350000	2040000	2820000	0.494921	1.18003	0.238827
pme1952	Riboflavin	Vitamins	21300000	23900000	28000000	27300000	22200000	21700000	0.16002	0.972678	-0.0399664
pme2111	L-ascorbate	Vitamins	111000	123000	155000	280000	244000	201000	1.18231	1.86375	0.898211
pme2165	Orotic acid	Vitamins	363000	375000	370000	909000	778000	689000	1.26576	2.1444	1.10058
pme2266	Biotin	Vitamins	3760000	3090000	2050000	6620000	3480000	2800000	0.610212	1.44944	0.535494
pme2661	Vitamin D3	Vitamins	13700	15300	13200	5240	8100	11300	1.02332	0.583886	-0.776241
pme2846	Nicotinamide-N-oxide	Vitamins	103000	83700	77700	147000	57200	66800	0.117288	1.02496	0.0355707
pme3478	Pantetheine	Vitamins	21600	43700	24700	195000	235000	230000	1.26318	7.33333	2.87447

## Sheet: Table S3
Table S3. The downregulated differential metabolites in the succulent stems
Index	Compounds	Class	NX1	NX2	NX3	BW1	BW2	BW3	VIP	Fold_Change	Log2FC
			Peak area
pme0436	Procyanidin B3	Proanthocyanidins	494000	644000	646000	127000	102000	83700	1.27512	0.17528	-2.51226
pmb0837	Procyanidin A3	Proanthocyanidins	43500000	45300000	46600000	17400000	9950000	7610000	1.22161	0.258198	-1.95345
pma0791	Naringenin O-malonylhexoside	Flavanone	245000	138000	160000	91300	84700	80900	1.16081	0.473112	-1.07975
pmb3041	Tricin O-saccharic acid	Flavone	5360000	8220000	5640000	2700000	1620000	1390000	1.20346	0.297086	-1.75105
pmb2987	Acacetin O-acetyl hexoside	Flavone	57500	89900	116000	49200	33500	46100	1.06605	0.48899	-1.03212
pmb0619	Eriodictiol 6-C-hexoside 8-C-hexoside-O-hexoside	Flavone C-glycosides	109000	180000	96200	9	9	9	1.29257	7.00935e-05	-13.8004
pma6515	C-hexosyl-chrysin O-feruloylhexoside	Flavone C-glycosides	1900000	551000	3510000	182000	118000	193000	1.15713	0.0827042	-3.59589
pme3227	Vitexin 2''-O-beta-L-rhamnoside	Flavone C-glycosides	1120000	1350000	923000	191000	146000	137000	1.27812	0.139699	-2.8396
pma0724	Naringenin C-hexoside	Flavone C-glycosides	1900000	1300000	1190000	731000	784000	519000	1.15494	0.463326	-1.1099
pma6353	Chrysin C-hexoside	Flavone C-glycosides	1150000	803000	646000	495000	397000	345000	1.13214	0.475952	-1.07111
pme2493	Kaempferol 3,7-dirhamnoside (Kaempferitrin)	Flavonol	5670000	7700000	12400000	2830000	2540000	2380000	1.20059	0.300737	-1.73342
pme3840	Pantothenol	Alcohols and polyols	51400	97000	75300	12500	26400	24500	1.17312	0.283415	-1.81901
pme2636	Enterodiol	Alcohols and polyols	105000	118000	76800	27800	31200	32200	1.26	0.304203	-1.71689
pmb0785	Isoquinoline	Alkaloids	278000	213000	158000	64400	131000	77500	1.10836	0.420493	-1.24985
pme2430	N-Acetyl-L-tyrosine	Amino acid derivatives	1560000	3650000	4330000	518000	300000	397000	1.22	0.127358	-2.97303
pmb2591	Acetyl tryptophan	Amino acid derivatives	18100000	11700000	9280000	4580000	2520000	3730000	1.19278	0.277124	-1.8514
pme0231	N-(3-Indolylacetyl)-L-alanine	Amino acid derivatives	219000	294000	230000	49900	58000	107000	1.206	0.289233	-1.7897
pme2915	3-Hydroxy-3-methylpentane-1,5-dioic acid	Amino acid derivatives	549000	545000	336000	169000	252000	191000	1.16665	0.427972	-1.22441
pme0252	N-Acetyl-l-leucine	Amino acid derivatives	144000000	155000000	124000000	65900000	49600000	71100000	1.23387	0.441135	-1.18071
pme0195	L-Cysteine	Amino acids	2040000	1990000	1650000	19800	20300	19400	1.29298	0.0104754	-6.57686
pme0309	Methyl gallate	Benzoic acid derivatives	53200000	71400000	86900000	13400000	18000000	25400000	1.22216	0.268558	-1.89669
pmb0247	p-Aminobenzoate	Benzoic acid derivatives	1740000	1680000	2150000	449000	668000	403000	1.25351	0.27289	-1.87361
pme0414	Vanillin	Benzoic acid derivatives	1150000	723000	743000	270000	281000	300000	1.24523	0.325306	-1.62013
pme0240	Benzoic acid	Benzoic acid derivatives	15500	42000	34500	6470	12100	13500	1.03892	0.348587	-1.52041
pme0500	D(+)-Melezitose	Carbohydrates	167000	501000	593000	52800	107000	96500	1.11065	0.203251	-2.29866
pma0134	D(-)-Threose	Carbohydrates	1490000	1530000	1400000	544000	913000	423000	1.15787	0.425339	-1.23331
pmb3114	Epicatechin-epiafzelechin	Catechin derivatives	193000	619000	257000	94400	92300	69200	1.13061	0.239383	-2.06261
pme2482	Protocatechuic aldehyde	Catechin derivatives	16900000	23700000	19300000	7130000	6460000	5030000	1.25663	0.310851	-1.6857
pmb2947	Catechin-catechin-catechin	Catechin derivatives	9510000	9240000	16300000	4190000	4010000	4490000	1.20982	0.362054	-1.46572
pme0205	Catechin	Catechin derivatives	5410000	8880000	6820000	2560000	2680000	2710000	1.2392	0.376599	-1.4089
pmb1178	O-Feruloyl 2-hydroxylcoumarin	Coumarins	4170000	5050000	3310000	108000	175000	135000	1.28639	0.0333599	-4.90574
pme3143	6-Hydroxy-4-methylcoumarin	Coumarins	115000	123000	94300	48100	62900	53900	1.23342	0.496238	-1.01089
pmb0423	Hydroxy-methoxycinnamate	Hydroxycinnamoyl derivatives	2550000	4110000	1130000	331000	311000	217000	1.20731	0.11027	-3.18089
pmb0108	Feruloyl syringic acid	Hydroxycinnamoyl derivatives	3030000	1580000	2240000	277000	321000	345000	1.26758	0.137664	-2.86077
pmb2620	3,4-Dimethoxycinnamic acid	Hydroxycinnamoyl derivatives	1580000	3930000	608000	265000	319000	354000	1.07009	0.153318	-2.7054
pme3246	Coniferin	Hydroxycinnamoyl derivatives	1760000	6020000	2600000	884000	813000	373000	1.11486	0.199422	-2.3261
pme3446	Sinapinaldehyde	Hydroxycinnamoyl derivatives	90600	85500	60800	32600	28000	21500	1.22763	0.34656	-1.52882
pme1434	Syringin	Hydroxycinnamoyl derivatives	393000	904000	692000	291000	254000	233000	1.12326	0.391151	-1.3542
pmb0863	LysoPC 16:2 (2n isomer)	Lipids_Glycerophospholipids	68300000	36100000	152000000	10500000	17900000	15700000	1.13514	0.171997	-2.53955
pmb2260	LysoPC 15:1	Lipids_Glycerophospholipids	749000	623000	746000	283000	244000	393000	1.21616	0.434372	-1.203
pmb0964	iP7G	Nucleotide and its derivates	2980000	4810000	5000000	432000	723000	1100000	1.2201	0.17631	-2.50382
pme3970	β-Pseudouridine	Nucleotide and its derivates	832000	692000	1440000	195000	176000	183000	1.24886	0.18691	-2.41959
pma0675	o-Anisic acid	Organic acids	60900	91000	77300	9	9	9	1.29331	0.000117801	-13.0514
pme1683	D-Pantothenic dcid	Organic acids	264000	738000	494000	64300	107000	115000	1.18674	0.191377	-2.38551
pme3207	trans,trans-Muconic acid	Organic acids	3960000	3950000	4510000	990000	1080000	1490000	1.26682	0.286634	-1.80272
pme1730	D-Erythronolactone	Organic acids	162000	248000	363000	61600	87800	90400	1.17552	0.31022	-1.68864
pmb3101	2-Isopropylmalate	Organic acids	12400000	15000000	14100000	8730000	3110000	4380000	1.10695	0.390843	-1.35534
pme3346	5-hydroxyhexanoic acid	Organic acids	1680000	2050000	1960000	1300000	477000	666000	1.08349	0.42935	-1.21977
pme0474	4-Hydroxybenzoic acid	Organic acids	1410000	1970000	1520000	799000	818000	510000	1.18672	0.434082	-1.20396
pme0237	Ethyl 3,4-Dihydroxybenzoate (Ethyl protocatechuate)	Organic acids	65300	116000	57400	38700	27600	40600	1.08453	0.447842	-1.15894
pme2591	5,6-Dimethylbenzimidazole	Others	104000	159000	169000	9	9	9	1.29317	6.25e-05	-13.9658
pmb1240	Phellodensin F	Others	15900000	11100000	9580000	2380000	2650000	1540000	1.25152	0.179606	-2.47709
pmb0758	Anisic acid O-feruloyl hexoside	Others	4890000	5510000	5670000	1870000	1460000	1630000	1.28004	0.30865	-1.69596
pmb4486	Hordatine B	Phenolamides	21500	16700	23200	6540	10100	11700	1.15595	0.461564	-1.1154
pmb0752	3-O-Feruloyl quinic acid	Quinate and its derivatives	83200	61000	68700	9	9	9	1.29337	0.00012682	-12.9449
pmb3066	5-O-p-coumaroyl shikimic acid O-hexoside	Quinate and its derivatives	51700	39300	48400	9	9	9	1.29343	0.000193687	-12.334
pmb3064	3-O-p-coumaroyl quinic acid O-hexoside	Quinate and its derivatives	21000	26100	26900	8900	8290	7500	1.276	0.333649	-1.5836
MWS4053	Ursolic acid	terpene	465000	357000	707000	277000	118000	198000	1.07873	0.387835	-1.36648
pme3544	Limonin	Terpenoids	716000	267000	100000	9	9	9	1.28533	2.49307e-05	-15.2917
pmb0426	5-Methoxy-N,N-dimethyltryptamine	Tryptamine derivatives	3310000	4080000	4450000	841000	727000	614000	1.27969	0.184291	-2.43995
pmb0769	N-hexosyl-p-coumaroyl serotonin	Tryptamine derivatives	528000	438000	372000	148000	82500	66800	1.22559	0.222197	-2.17009
pme2786	N-Acetyl-5-hydroxytryptamine	Tryptamine derivatives	6830000	10800000	9540000	3820000	4370000	4000000	1.2177	0.448657	-1.15632

## Sheet: Table S4
Table S4. The upregulated differential metabolites in inflorescences
Index	Compounds	Class	NX1	NX2	NX3	BW1	BW2	BW3	VIP	Fold_Change	Log2FC
			Peak area
pme0444	Malvidin 3-O-glucoside (Oenin)	Anthocyanins	9	9	9	1120000	1530000	1540000	1.29338	155185	17.2436
pme1397	Pelargonidin	Anthocyanins	9	9	9	314000	152000	121000	1.29175	21740.7	14.4081
pme1773	Cyanidin 3-O-rutinoside (Keracyanin)	Anthocyanins	636000	102000	320000	11600000	16000000	23900000	1.24573	48.6767	5.60516
pme1777	Cyanidin 3,5-O-diglucoside (Cyanin)	Anthocyanins	16100000	551000	989000	46600000	76700000	70300000	1.10303	10.9751	3.45616
pmb2957	Cyanidin O-syringic acid	Anthocyanins	1720000	50600	274000	4420000	7690000	8150000	1.07796	9.90903	3.30874
pme3609	Cyanidin	Anthocyanins	572000	443000	362000	2670000	6300000	3640000	1.25055	9.15759	3.19497
pme0442	Delphinidin	Anthocyanins	76800	66400	109000	422000	533000	645000	1.26594	6.34417	2.66543
pme0094	Cyanidin 3-O-glucoside (Kuromanin)	Anthocyanins	23600000	764000	4080000	47300000	67300000	63500000	1.03318	6.26143	2.64649
pma1590	Peonidin O-hexoside	Anthocyanins	2040000	187000	345000	3240000	4030000	5020000	1.05975	4.77838	2.25652
pme3439	Butein	Flavanone	9	9	9	16600	58500	58000	1.28669	4929.63	12.2673
pme0330	Naringenin 7-O-neohesperidoside (Naringin)	Flavanone	9	9	68400	1160000	4270000	6000000	1.09757	167.061	7.38423
pme1600	7-O-Methyleriodictyol	Flavanone	49300	26400	35400	203000	16200000	397000	1.00427	151.215	7.24046
pme2960	Naringenin chalcone	Flavanone	634000	396000	530000	4100000	5630000	7190000	1.27314	10.8462	3.43911
pme0377	Naringenin	Flavanone	618000	402000	520000	4070000	5570000	6670000	1.2767	10.5909	3.40475
pme1583	Eriodictyol	Flavanone	606000	433000	867000	4210000	5050000	5610000	1.26563	7.80168	2.96378
pme1598	Hesperetin 5-O-glucoside	Flavanone	5500000	7020000	7420000	35300000	54500000	44100000	1.27534	6.71515	2.74742
pme3282	Afzelechin (3,5,7,4'-Tetrahydroxyflavan)	Flavanone	135000	176000	221000	1380000	569000	359000	1.09425	4.33835	2.11715
pme2979	Pinocembrin (Dihydrochrysin)	Flavanone	134000	142000	201000	680000	620000	640000	1.27205	4.06709	2.024
pme1544	Acacetin	Flavone	9	9	9	22800	2870000	42900	1.2322	108730	16.7304
pmb3002	Chrysoeriol 7-O-rutinoside	Flavone	9	9	9	191000	308000	276000	1.29299	28703.7	14.8089
pmb3053	Tricin O-eudesmic acid	Flavone	9	9	9	53800	126000	20900	1.28402	7433.33	12.8598
pmb2954	Luteolin O-hexosyl-O-hexosyl-O-hexoside	Flavone	112000	93700	111000	4020000	7030000	7090000	1.28702	57.2782	5.83991
pmb0603	Chrysoeriol O-hexosyl-O-hexoside	Flavone	9	7670	9	58900	137000	170000	1.09285	47.5937	5.5727
pme2459	Luteolin 7-O-glucoside (Cynaroside)	Flavone	1910000	1860000	2270000	18400000	32700000	33800000	1.27672	14.0563	3.81314
pme3475	Butin	Flavone	645000	386000	525000	4050000	6260000	7340000	1.27008	11.3432	3.50375
pma0249	Selgin 5-O-hexoside	Flavone	192000	417000	258000	2770000	1170000	1270000	1.20128	6.00923	2.58718
pme0208	Amentoflavone	Flavone	5040	8930	16500	28000	37900	34900	1.13359	3.30817	1.72603
pmb2999	Chrysoeriol 5-O-hexoside	Flavone	65200	68500	81000	208000	269000	215000	1.27217	3.2231	1.68845
pmb0623	6-C-hexosyl chrysoeriol O-hexoside	Flavone C-glycosides	9	9	9	2140000	2000000	2340000	1.29367	240000	17.8727
pmb0644	Luteolin C-hexoside	Flavone C-glycosides	9	9	9	79600	133000	91600	1.29276	11266.7	13.4598
pmb2969	Hesperetin C-hexoside O-hexoside	Flavone C-glycosides	9	4560	9	34400	71700	78500	1.09703	40.3233	5.33354
pmb0665	Luteolin 8-C-hexosyl-O-hexoside	Flavone C-glycosides	1100000	747000	1630000	23500000	36700000	42700000	1.27474	29.5945	4.88726
pma6516	C-hexosyl-apigenin O-hexosyl-O-hexoside	Flavone C-glycosides	635000	285000	432000	3540000	729000	1320000	1.00472	4.13388	2.0475
pmb0618	8-C-hexosyl-hesperetin O-hexoside	Flavone C-glycosides	2800000	2340000	4470000	10600000	15300000	13600000	1.23473	4.1103	2.03924
pmb0639	8-C-hexosyl-apigenin O-hexosyl-O-hexoside	Flavone C-glycosides	1180000	538000	612000	4940000	1690000	2640000	1.11951	3.97854	1.99224
pmb0645	6-C-hexosyl-hesperetin O-hexoside	Flavone C-glycosides	648000	540000	739000	1590000	3230000	2240000	1.21706	3.66373	1.87331
pme3297	Kaempferol 3-O-rhamnoside (Kaempferin)	Flavonol	9	9	9	560000	1240000	855000	1.29237	98333.3	16.5854
pme3484	Myricetin 3-O-galactoside	Flavonol	9	9	9	804000	443000	435000	1.293	62296.3	15.9269
pmb0565	Syringetin 3-O-hexoside	Flavonol	9	9	9	116000	171000	140000	1.29317	15814.8	13.949
pme0369	Kaempferol 3-O-rutinoside (Nicotiflorin)	Flavonol	217000	289000	687000	78000000	111000000	102000000	1.28219	243.923	7.93028
pme1605	Kaempferol 3-O-robinobioside (Biorobin)	Flavonol	233000	244000	671000	76200000	106000000	97600000	1.28243	243.728	7.92913
pme3468	Kaempferol-3-O-robinoside-7-O-rhamnoside (Robinin)	Flavonol	1480	9	9	39800	88600	62300	1.16629	127.303	6.99212
pme0197	Quercetin 3-O-rutinoside (Rutin)	Flavonol	109000	78100	140000	4010000	6070000	6730000	1.28425	51.391	5.68344
pme0200	Kaempferol	Flavonol	23400	41100	53600	1370000	1640000	1210000	1.27974	35.7324	5.15916
pmb0711	Quercetin 7-O-rutinoside	Flavonol	370000	222000	485000	7230000	13200000	14200000	1.27225	32.1541	5.00693
pmb3894	Di-O-methylquercetin	Flavonol	327000	607000	216000	20200000	7910000	2570000	1.18684	26.6783	4.73759
pme3268	Kaempferol 3-O-galactoside (Trifolin)	Flavonol	1340000	1440000	1680000	17900000	36800000	35900000	1.27521	20.3139	4.3444
pme0361	Quercetin 3-alpha-L-arabinofuranoside (Avicularin)	Flavonol	1620000	1180000	1520000	14500000	34000000	27700000	1.26871	17.6389	4.14069
pme2963	Aromadedrin (Dihydrokaempferol)	Flavonol	1030000	597000	1000000	12700000	9220000	7600000	1.27101	11.2372	3.4902
pme1588	Isorhamnetin	Flavonol	4780	4420	8970	58900	56900	71100	1.26854	10.2862	3.36264
pme3514	Morin	Flavonol	2560000	5610000	9090000	36000000	26500000	27200000	1.18586	5.19699	2.37768
pmb0706	Quercetin 5-O-malonylhexosyl-hexoside	Flavonol	63000	46900	48800	307000	214000	204000	1.26727	4.56837	2.19168
pme1540	Isorhamnetin 3-O-neohesperidoside	Flavonol	312000	415000	510000	2760000	1270000	1490000	1.21061	4.46241	2.15782
pme2954	Quercetin	Flavonol	920000	1540000	2670000	9020000	5610000	7040000	1.18139	4.22417	2.07867
pme3212	Quercetin 3-O-glucoside (Isotrifoliin)	Flavonol	684000	739000	713000	2050000	3590000	3040000	1.25535	4.06367	2.02278
pme3130	Quercetin 4'-O-glucoside (Spiraeoside)	Flavonol	722000	718000	803000	1970000	3410000	3060000	1.249	3.76282	1.91181
pme1521	Dihydroquercetin (Taxifolin)	Flavonol	4970000	5860000	15400000	26200000	25200000	26100000	1.11655	2.95463	1.56298
pme2256	D-Arabitol	Alcohols and polyols	9770	13800	20600	62300	40600	66200	1.20603	3.82839	1.93674
pme2237	Dulcitol	Alcohols and polyols	75700	60700	85100	128000	151000	344000	1.06896	2.81264	1.49193
pme0499	D-Sorbitol	Alcohols and polyols	47900	45600	64000	103000	108000	228000	1.12043	2.7873	1.47887
pme0171	N-Isovaleroylglycine	Amino acid derivatives	9	9	10100	84400	110000	1170000	1.08742	134.849	7.0752
pme0190	N-Glycyl-L-leucine	Amino acid derivatives	44200	23800	37000	378000	560000	548000	1.27537	14.1524	3.82297
pme1313	N'-Formylkynurenine	Amino acid derivatives	816000	670000	725000	14000000	6140000	3880000	1.22672	10.8639	3.44147
pme1286	S-(5'-Adenosy)-L-homocysteine	Amino acid derivatives	5620000	3750000	6500000	55500000	38300000	54400000	1.27325	9.33837	3.22317
pme1018	Glutathione oxidized	Amino acid derivatives	1220000	988000	272000	7460000	7170000	7990000	1.20577	9.12097	3.18919
pme0180	1-Methylhistidine	Amino acid derivatives	12100	11700	14800	89900	118000	96300	1.28557	7.88083	2.97835
pme2735	S-(5'-Adenosyl)-L-methionine	Amino acid derivatives	50000000	26400000	15500000	127000000	241000000	284000000	1.19551	7.09467	2.82674
pme0113	γ-Glu-Cys	Amino acid derivatives	523000	242000	120000	1980000	1580000	2090000	1.19122	6.38418	2.6745
pme1419	L-Methionine methyl ester	Amino acid derivatives	175000	146000	272000	874000	1600000	1080000	1.24193	5.99325	2.58334
pme1090	Glutathione reduced form	Amino acid derivatives	703000	423000	162000	2700000	2630000	2190000	1.1808	5.83851	2.5456
pme0066	Guanidineacetic acid	Amino acid derivatives	13300	16300	17600	145000	67400	53500	1.20985	5.63347	2.49403
pmb0962	Lysine butyrate	Amino acid derivatives	28600	54700	61800	114000	268000	292000	1.14993	4.64507	2.2157
pme2698	Phe-Phe	Amino acid derivatives	166000	142000	283000	806000	915000	844000	1.24418	4.3401	2.11773
pme0128	D-Alanyl-D-Alanine	Amino acid derivatives	2990	2390	3040	8670	11200	13100	1.26508	3.91568	1.96926
pme3388	H-HomoArg-OH	Amino acid derivatives	2060000	1720000	1810000	6640000	8180000	6580000	1.28197	3.82826	1.93669
pme0121	N6-Acetyl-L-lysine	Amino acid derivatives	91400	48700	93400	327000	181000	364000	1.17544	3.73448	1.90091
pme2122	Histamine	Amino acid derivatives	261000	148000	230000	727000	777000	801000	1.25008	3.6072	1.85088
pme0247	trans-4-Hydroxy-L-proline	Amino acid derivatives	54500	45100	57300	135000	86200	168000	1.16906	2.48056	1.31067
pmb2561	N-Acetylmethionine	Amino acid derivatives	701000	1020000	1280000	2960000	1820000	2200000	1.14408	2.32589	1.21778
pme0176	Phenylacetyl-L-glutamine	Amino acid derivatives	7840	3960	7830	12900	13500	18200	1.11469	2.27203	1.18398
pme1239	S-(methyl)glutathione	Amino acid derivatives	70800	68500	88300	154000	175000	158000	1.2587	2.13972	1.09742
pme0174	N-Propionylglycine	Amino acid derivatives	2210000	3320000	3130000	5160000	6400000	6230000	1.20158	2.05427	1.03863
pme1002	L-Tyramine	Amino acids	572000	64600	512000	10600000	17000000	13600000	1.2134	35.8698	5.1647
pme0042	L-(+)-Arginine	Amino acids	933000	570000	848000	32100000	17300000	11200000	1.26554	25.7763	4.68797
pme0026	L-(+)-Lysine	Amino acids	955000	951000	1190000	21900000	23200000	24700000	1.29163	22.5452	4.49475
pme0007	L-Citrulline	Amino acids	231000	152000	115000	2360000	1870000	1120000	1.25532	10.743	3.42532
pme1210	L-Methionine	Amino acids	2080000	1290000	4720000	14600000	16200000	15100000	1.19786	5.67367	2.50428
pme0463	L-Theanine	Amino acids	733000	724000	613000	3670000	3760000	3080000	1.28682	5.07729	2.34406
pme2890	L-Homocystine	Amino acids	167000	318000	194000	728000	1550000	1120000	1.21334	5.00442	2.3232
pme0036	L-Histidine	Amino acids	628000	1220000	879000	3650000	4600000	4270000	1.2506	4.59113	2.19885
pme1408	L-Glutamine	Amino acids	2690000	1960000	3540000	12900000	9860000	11500000	1.25262	4.18315	2.06459
pme0020	L-Phenylalanine	Amino acids	24900000	27700000	32200000	78800000	99900000	109000000	1.26711	3.39269	1.76243
pme0016	L-(-)-Cystine	Amino acids	672000	542000	437000	2330000	1100000	1100000	1.12113	2.74379	1.45617
pme0013	L-Glutamic acid	Amino acids	6490000	10200000	6050000	14600000	18900000	18300000	1.18682	2.27792	1.18772
pme0018	L-Leucine	Amino acids	1080000	2090000	1550000	2860000	3460000	4030000	1.14139	2.1928	1.13277
pmb2871	2,5-dihydroxy benzoic acid O-hexside	Benzoic acid derivatives	9	9	9	1540000	3530000	3150000	1.29233	304444	18.2158
pme0310	Ethyl gallate	Benzoic acid derivatives	9	9	9	53000	69900	145000	1.29081	9922.22	13.2764
pme1814	2,5-dihydroxybenzoic acid (Gentisic acid)	Benzoic acid derivatives	464000	266000	461000	1160000	1420000	1640000	1.22916	3.54324	1.82507
pma6455	Ribulose-5-phosphate	Carbohydrates	222000	162000	184000	1310000	641000	904000	1.24588	5.02641	2.32953
pme0534	Gluconic acid	Carbohydrates	2130000	2480000	2100000	9580000	6920000	6640000	1.26761	3.44858	1.786
pme3163	D-Sedoheptuiose 7-phosphate	Carbohydrates	667000	674000	1000000	2130000	2090000	2440000	1.24878	2.84494	1.5084
pmb3081	Glucarate O-Phosphoric acid	Carbohydrates	639000	609000	905000	1600000	1830000	1820000	1.24008	2.43846	1.28597
pme3160	D-Glucose 6-phosphate	Carbohydrates	4700000	6100000	4300000	11000000	10400000	9130000	1.22818	2.02185	1.01568
pmb2586	Gallocatechin-catechin	Catechin derivatives	5250	5650	10900	1430000	1970000	1700000	1.28774	233.945	7.87003
pme1486	Epigallate catechin gallate (EGCG)	Catechin derivatives	510000	2430000	2690000	12500000	9010000	7850000	1.10915	5.21492	2.38265
pme1824	Protocatechuic acid	Catechin derivatives	3370000	1810000	3100000	10200000	11200000	12800000	1.24433	4.13043	2.04629
pme1535	(+)-Gallocatechin (GC)	Catechin derivatives	387000	528000	999000	2560000	1400000	1070000	1.02074	2.628	1.39397
pme3459	Caffeyl alcohol	Hydroxycinnamoyl derivatives	9	9	9	1160000	228000	109000	1.28276	55444.4	15.7588
pme1646	Pinoresinol	Hydroxycinnamoyl derivatives	204000	169000	188000	491000	341000	348000	1.22074	2.10339	1.07271
pme0543	Indole-5-carboxylic acid	Indole derivatives	9	9	9	82000	40400	29200	1.29067	5614.81	12.455
pmb2786	9-HOTrE	Lipids_Fatty acids	16100	51000	32200	843000	207000	200000	1.16548	12.5881	3.65399
pma0461	14,15-Dehydrocrepenynic acid	Lipids_Fatty acids	297000	850000	562000	13600000	3300000	3130000	1.16044	11.7203	3.55094
pmb2778	9,10-EODE	Lipids_Fatty acids	1030000	3890000	2160000	44200000	23100000	3900000	1.00831	10.0565	3.33006
pmb2787	9-KODE	Lipids_Fatty acids	10500	37200	21500	302000	128000	83600	1.14351	7.42197	2.8918
pmb2791	9-HpOTrE	Lipids_Fatty acids	55700	93600	102000	546000	164000	161000	1.00672	3.46598	1.79326
pmb5304	α-Linolenic acid	Lipids_Fatty acids	6470	25400	19900	68400	37400	43500	1.01976	2.88391	1.52803
pmb0880	LysoPE 18:0 (2n isomer)	Lipids_Glycerophospholipids	7440	11400	13800	95700	158000	156000	1.26861	12.5521	3.64985
pmd0130	LysoPC 14:0 (2n isomer)	Lipids_Glycerophospholipids	2800000	3920000	3430000	32800000	18000000	26800000	1.26945	7.64532	2.93458
pmb2369	PC 19:2/16:0	Lipids_Glycerophospholipids	16600	62700	29200	303000	224000	298000	1.21466	7.60369	2.9267
pmb0866	LysoPC 14:0	Lipids_Glycerophospholipids	2120000	2940000	2660000	24100000	12500000	18600000	1.26437	7.15026	2.838
pmb0862	LysoPC 12:1	Lipids_Glycerophospholipids	38800	31400	26200	152000	182000	151000	1.2779	5.03112	2.33088
pmb3117	LysoPE 16:0	Lipids_Glycerophospholipids	20500000	27200000	28200000	119000000	89200000	108000000	1.2725	4.16601	2.05867
pmb0864	LysoPE 14:0	Lipids_Glycerophospholipids	2760000	3690000	4170000	19000000	10100000	14700000	1.23472	4.12429	2.04415
pmb0855	LysoPC 16:0	Lipids_Glycerophospholipids	2100000	4630000	2700000	14100000	11000000	13600000	1.22668	4.10392	2.037
pmd0160	LysoPE 16:0 (2n isomer)	Lipids_Glycerophospholipids	36900000	47500000	47100000	192000000	150000000	176000000	1.27766	3.93916	1.97789
pmd0132	LysoPC 16:0 (2n isomer)	Lipids_Glycerophospholipids	2200000	4870000	2920000	13900000	11200000	13600000	1.22318	3.87387	1.95378
pmd0136	LysoPC 18:0	Lipids_Glycerophospholipids	4550000	6370000	5140000	16900000	17300000	26400000	1.2501	3.77335	1.91585
pmb2165	LysoPC 10:0	Lipids_Glycerophospholipids	24800	16600	12700	52100	52200	71600	1.21602	3.25139	1.70105
pmb0882	LysoPC 18:1	Lipids_Glycerophospholipids	5290000	9610000	11500000	26500000	29600000	27600000	1.20184	3.17045	1.66469
pmb0854	LysoPC 18:3	Lipids_Glycerophospholipids	9430000	19000000	12800000	37400000	31100000	38200000	1.18812	2.58792	1.37179
pmb2406	LysoPC 17:0	Lipids_Glycerophospholipids	8000000	12000000	6350000	19000000	19100000	27400000	1.16868	2.48577	1.31369
pmb0883	LysoPE 18:0	Lipids_Glycerophospholipids	3560000	4050000	3570000	8140000	6710000	10100000	1.2342	2.23166	1.15812
pme0005	Purine	Nucleotide and its derivates	9	9	9	3720000	5840000	4590000	1.29329	524074	18.9994
pmb2952	2'-Deoxyinosine	Nucleotide and its derivates	9	9	9	47100	18100	195000	1.27828	9637.04	13.2344
pmb2684	Cyclic AMP	Nucleotide and its derivates	38800	34600	57500	441000	570000	1350000	1.24965	18.0367	4.17286
pme3982	Hypoxanthine-9-β-D-arabinofuranoside	Nucleotide and its derivates	225000	249000	546000	4270000	3590000	7140000	1.25292	14.7059	3.87832
pme1119	Inosine	Nucleotide and its derivates	76000	40600	59400	405000	798000	763000	1.25788	11.1705	3.48162
pme0230	Adenosine	Nucleotide and its derivates	2480000	3250000	2660000	31400000	23900000	34600000	1.28554	10.7151	3.42158
pmb2948	Adenosine 3'-monophosphate	Nucleotide and its derivates	182000	167000	165000	1600000	1690000	1570000	1.29295	9.45525	3.24112
pme3960	Deoxyadenosine	Nucleotide and its derivates	5720	2910	12300	51900	26200	80000	1.15495	7.55375	2.91719
pme1378	1-Methyladenosine	Nucleotide and its derivates	31100	36400	36500	279000	194000	309000	1.2798	7.51923	2.91059
pme1692	Inosine 5'-monophosphate	Nucleotide and its derivates	175000	148000	160000	1280000	1110000	939000	1.28682	6.89234	2.78499
pme3188	Uridine 5'-monophosphate	Nucleotide and its derivates	1130000	1210000	1050000	8160000	6660000	7800000	1.29033	6.67257	2.73824
pme2555	Adenosine 5'-monophosphate	Nucleotide and its derivates	2220000	1790000	2010000	14600000	14200000	11000000	1.28511	6.6113	2.72493
pme1184	Deoxyguanosine	Nucleotide and its derivates	3130000	2310000	3980000	19200000	13200000	27100000	1.2444	6.31635	2.65909
pme3007	Uridine 5’-diphosphate	Nucleotide and its derivates	145000	152000	84300	965000	684000	698000	1.25983	6.15526	2.62182
pme2278	Guanosine monophosphate	Nucleotide and its derivates	315000	127000	229000	1630000	1190000	950000	1.22216	5.61848	2.49018
pmb0530	Nicotinic acid adenine dinucleotide	Nucleotide and its derivates	1050000	1020000	365000	4040000	4220000	4890000	1.20523	5.40041	2.43307
pme2746	Flavin adenine dinucleotide (FAD)	Nucleotide and its derivates	1000000	600000	478000	2290000	3670000	4780000	1.2127	5.16843	2.36973
pmc0304	Succinyladenosine	Nucleotide and its derivates	775000	1270000	816000	7230000	2500000	4140000	1.17974	4.84796	2.27738
pme0263	5-Methyluridine	Nucleotide and its derivates	228000	136000	249000	893000	650000	1390000	1.21218	4.78467	2.25842
pme1175	Guanosine	Nucleotide and its derivates	11000000	1950000	14900000	55100000	26300000	50100000	1.03745	4.72172	2.23931
pmb0197	N2-methylguanosine	Nucleotide and its derivates	1850000	989000	1540000	7730000	4360000	7100000	1.22345	4.38228	2.13168
pmb2922	Uridine 5'-diphospho-D-glucose	Nucleotide and its derivates	14300000	12300000	8510000	66000000	45300000	35500000	1.22886	4.18114	2.0639
pme1063	Uridine	Nucleotide and its derivates	1420000	1600000	2430000	6850000	7360000	8480000	1.25655	4.1633	2.05773
pmb0998	Guanosine 5'-monophosphate	Nucleotide and its derivates	967000	583000	413000	3510000	2140000	2430000	1.20534	4.11615	2.0413
pme3732	Cytidine	Nucleotide and its derivates	410000	359000	630000	1680000	1900000	2160000	1.25176	4.10293	2.03665
pme3337	N6-Succinyl Adenosine	Nucleotide and its derivates	15900000	27700000	16200000	122000000	40800000	68900000	1.12918	3.87458	1.95404
pme0264	Thymidine	Nucleotide and its derivates	346000	167000	567000	748000	1270000	2140000	1.06823	3.85	1.94486
pme1109	Guanine	Nucleotide and its derivates	46100000	15700000	49800000	157000000	113000000	130000000	1.13151	3.58423	1.84166
pmc0274	6-Methylmercaptopurine	Nucleotide and its derivates	6260000	8170000	8400000	21600000	27100000	28600000	1.26522	3.3859	1.75954
pme1194	Deoxycytidine	Nucleotide and its derivates	66700	65400	73300	220000	209000	259000	1.28414	3.34956	1.74397
pme1474	5'-Deoxy-5'-(methylthio)adenosine	Nucleotide and its derivates	1970000	1320000	1620000	5190000	5140000	5380000	1.26943	3.19959	1.67789
pme3104	1-Methyladenine	Nucleotide and its derivates	672000	471000	846000	1940000	1850000	1650000	1.22298	2.73504	1.45156
pme0038	Cytosine	Nucleotide and its derivates	231000	162000	209000	456000	513000	657000	1.23766	2.701	1.43349
pme0040	Adenine	Nucleotide and its derivates	13900000	29300000	17900000	58200000	42300000	58700000	1.16245	2.60556	1.3816
pme0183	2-Hydroxy-6-aminopurine	Nucleotide and its derivates	1410000	375000	1130000	2090000	2890000	2510000	1.01931	2.56947	1.36147
pme0258	Uracil	Nucleotide and its derivates	2180000	2220000	2810000	6460000	4750000	7060000	1.23455	2.53398	1.34141
pme1711	3-Hydroxy-3-methyl butyric acid	Organic acids	192000	296000	262000	1170000	1440000	2370000	1.25024	6.64	2.73118
pme2277	3-Aminosalicylic acid	Organic acids	102000	57800	101000	617000	254000	355000	1.19349	4.70092	2.23294
pme0291	Dl-2-Aminooctanoic acid	Organic acids	136000	226000	246000	1270000	709000	839000	1.2288	4.63487	2.21253
pme2598	3,4-Dihydroxybenzeneacetic acid	Organic acids	226000	229000	233000	1900000	639000	596000	1.13588	4.55669	2.18798
pme2550	Cis-Aconitic acid	Organic acids	9310	25500	21300	81700	82500	88100	1.20337	4.49652	2.16881
pme2706	2,3-Dihydroxybenzoic acid	Organic acids	3580000	2020000	2980000	10800000	12500000	14500000	1.25452	4.40559	2.13934
pma6281	Methylglutaric acid	Organic acids	30600	20800	34900	133000	117000	130000	1.26521	4.40324	2.13857
pme0397	Shikimic acid	Organic acids	68000	105000	98500	352000	301000	406000	1.25943	3.90055	1.96368
pme2129	(S)-(-)-2-Hydroxyisocaproic acid	Organic acids	142000	159000	151000	463000	540000	717000	1.26812	3.80531	1.92801
pmb2657	Argininosuccinate	Organic acids	47700	64600	63200	262000	197000	187000	1.26363	3.68091	1.88006
pme0286	2-Hydroxyisocaproic acid	Organic acids	19100	24000	17800	54400	66500	86700	1.24973	3.40887	1.76929
pme0250	Azelaic Acid	Organic acids	663000	1290000	902000	4550000	2290000	1960000	1.11542	3.08231	1.62401
pme0267	2-Methylsuccinic acid	Organic acids	1610000	1750000	1700000	5200000	4550000	4760000	1.28909	2.86759	1.51984
pme3011	γ-aminobutyric acid	Organic acids	221000	176000	96800	385000	427000	599000	1.15208	2.85743	1.51472
pme1820	p–Hydroxyphenyl acetic acid	Organic acids	96600	142000	132000	456000	257000	267000	1.17552	2.64436	1.40292
pme0243	Glutaric acid	Organic acids	653000	908000	607000	2090000	1190000	2340000	1.14859	2.59225	1.37421
pma3649	5-Aminolevulinate	Organic acids	5200000	4630000	7100000	9140000	18300000	15500000	1.13433	2.53633	1.34274
pme3034	ethylmalonate	Organic acids	18400	34700	28600	76100	44400	83300	1.11249	2.49449	1.31875
pme2589	Oxoadipic acid	Organic acids	57100	58600	55700	104000	159000	154000	1.2323	2.43291	1.28268
pme1851	Creatine	Organic acids	3060000	2260000	3670000	8460000	7460000	5450000	1.1822	2.37709	1.24919
pme2050	Citric acid	Organic acids	207000000	205000000	209000000	436000000	504000000	379000000	1.26227	2.12399	1.08678
pmb2826	Citramalate	Organic acids	1500000	1930000	2440000	4530000	5040000	2600000	1.05692	2.07325	1.0519
pma0948	Hydroxyphenethylamine	Others	9	9	9	5300000	7810000	6420000	1.29339	723333	19.4643
pme1011	Benzamidine	Others	9	9	9	1540000	2320000	1950000	1.29331	215185	17.7152
pme2366	Phenethylamine	Others	358000	68400	279000	11100000	23800000	15900000	1.25372	72.0159	6.17024
pmb0069	Benzamide	Others	447000	72600	416000	13000000	28300000	18000000	1.2413	63.3818	5.986
pmb0374	Aminopurine	Others	6970000	8750000	8080000	88800000	62600000	99800000	1.28298	10.5546	3.3998
pme3081	4-(Aminomethyl)-5-(hydroxymethyl)-2-methylpyridin-3-ol	Others	86100	92000	127000	469000	730000	1800000	1.20564	9.82956	3.29713
pmb0764	4-Methyl-5-thiazoleethanol	Others	566000	512000	456000	3060000	4270000	4050000	1.28401	7.41851	2.89113
pme2246	Ellagic acid	Others	4240000	11700000	4620000	25600000	16600000	17300000	1.10538	2.89397	1.53305
pme2651	NADP	Others	208000	110000	132000	353000	347000	566000	1.1697	2.81333	1.49228
pme2831	1,1-Dimethylbiguanide	Others	110000	45300	97700	174000	181000	155000	1.04264	2.01581	1.01136
pma0692	N', N''-di-p-coumaroylspermidine	Phenolamides	9	9	9	8770000	15000000	11900000	1.29322	1.32111e+06	20.3333
pmb0500	"N',N""-p-coumaroyl-feruloyl putrescine"	Phenolamides	9	9	9	85200	887000	676000	1.28051	61044.4	15.8976
pmb0502	N-p-Coumaroyl spermidine	Phenolamides	9	9	39300	888000	1750000	1620000	1.09998	108.296	6.75884
pmb0490	N-p-Coumaroyl putrescine	Phenolamides	9	9	98700	1310000	2880000	3380000	1.0744	76.6831	6.26084
pmb0505	N'-p-Coumaroyl putrescine	Phenolamides	2450000	2070000	927000	10500000	51800000	34200000	1.19645	17.7162	4.147
pmb0492	"N',N"",N""'-p-coumaroyl-cinnamoyl-caffeoyl spermidine"	Phenolamides	2030000	3050000	1930000	36900000	23100000	25000000	1.27743	12.1255	3.59998
pma0584	N-Caffeoylspermidine	Phenolamides	100000	50100	40500	284000	181000	291000	1.18803	3.96642	1.98784
pmb0501	Agmatine	Phenolamides	492000	444000	461000	996000	1060000	885000	1.27642	2.10523	1.07397
pme2594	4-Pyridoxic acid	Pyridine derivatives	2290000	931000	1630000	5380000	8390000	8640000	1.20619	4.61967	2.20779
pmb3072	3-O-p-coumaroyl shikimic acid O-hexoside	Quinate and its derivatives	12100	12800	15400	54700	73700	92200	1.26771	5.47395	2.45258
pme2036	Quinic acid	Quinate and its derivatives	4620000	4490000	5580000	17400000	17300000	13800000	1.27448	3.30157	1.72315
pmb3075	3-O-p-Coumaroyl shikimic acid	Quinate and its derivatives	20300	27800	19200	105000	52600	36400	1.07181	2.88262	1.52738
pme1417	L-Tryptamine	Tryptamine derivatives	497000	276000	333000	10200000	17900000	13700000	1.28243	37.7939	5.24008
pme3478	Pantetheine	Vitamins	21600	43700	24700	195000	235000	230000	1.26318	7.33333	2.87447
pme1383	Pyridoxine	Vitamins	82500	72600	68300	286000	343000	405000	1.27922	4.62847	2.21054
pmb0800	Niacinamide	Vitamins	829000	717000	790000	2490000	2490000	2440000	1.29014	3.17637	1.66738
pme1306	Pyridoxine 5'-phosphate	Vitamins	272000	259000	269000	751000	358000	992000	1.06739	2.62625	1.393
pme2165	Orotic acid	Vitamins	363000	375000	370000	909000	778000	689000	1.26576	2.1444	1.10058

## Sheet: Table S5
Table S5. Secondary compounds of succulent stem for pharmacological network analysis.
Index	CAS	Compounds	Class	NX1	NX2	NX3	BW1	BW2	BW3	VIP	Fold_Change	Log2FC
				Peak area
MWS4053	-	Ursolic acid	terpene	465000	357000	707000	277000	118000	198000	1.07873	0.387835	-1.36648
pma0675	579-75-9	o-Anisic acid	Organic acids	60900	91000	77300	9	9	9	1.29331	0.000117801	-13.0514
pmb0247	150-13-0	p-Aminobenzoate	Benzoic acid derivatives	1740000	1680000	2150000	449000	668000	403000	1.25351	0.27289	-1.87361
pmb0426	1019-45-0	5-Methoxy-N,N-dimethyltryptamine	Tryptamine derivatives	3310000	4080000	4450000	841000	727000	614000	1.27969	0.184291	-2.43995
pmb0752	1899-29-2	3-O-Feruloyl quinic acid	Quinate and its derivatives	83200	61000	68700	9	9	9	1.29337	0.00012682	-12.9449
pmb0785	119-65-3	Isoquinoline	Alkaloids	278000	213000	158000	64400	131000	77500	1.10836	0.420493	-1.24985
pmb0837	86631-39-2	Procyanidin A3	Proanthocyanidins	43500000	45300000	46600000	17400000	9950000	7610000	1.22161	0.258198	-1.95345
pmb2620	14737-89-4	3,4-Dimethoxycinnamic acid	Hydroxycinnamoyl derivatives	1580000	3930000	608000	265000	319000	354000	1.07009	0.153318	-2.7054
pmb3101	-	2-Isopropylmalate	Organic acids	12400000	15000000	14100000	8730000	3110000	4380000	1.10695	0.390843	-1.35534
pmb3114	-	Epicatechin-epiafzelechin	Catechin derivatives	193000	619000	257000	94400	92300	69200	1.13061	0.239383	-2.06261
pmb4486	10502-21-3	Hordatine B	Phenolamides	21500	16700	23200	6540	10100	11700	1.15595	0.461564	-1.1154
pme0237	3943-89-3	Ethyl 3,4-Dihydroxybenzoate (Ethyl protocatechuate)	Organic acids	65300	116000	57400	38700	27600	40600	1.08453	0.447842	-1.15894
pme0240	65-85-0	Benzoic acid	Benzoic acid derivatives	15500	42000	34500	6470	12100	13500	1.03892	0.348587	-1.52041
pme0309	99-24-1	Methyl gallate	Benzoic acid derivatives	53200000	71400000	86900000	13400000	18000000	25400000	1.22216	0.268558	-1.89669
pme0414	121-33-5	Vanillin	Benzoic acid derivatives	1150000	723000	743000	270000	281000	300000	1.24523	0.325306	-1.62013
pme0436	23567-23-9	Procyanidin B3	Proanthocyanidins	494000	644000	646000	127000	102000	83700	1.27512	0.17528	-2.51226
pme0474	99-96-7	4-Hydroxybenzoic acid	Organic acids	1410000	1970000	1520000	799000	818000	510000	1.18672	0.434082	-1.20396
pme1434	118-34-3	Syringin	Hydroxycinnamoyl derivatives	393000	904000	692000	291000	254000	233000	1.12326	0.391151	-1.3542
pme1683	137-08-6	D-Pantothenic dcid	Organic acids	264000	738000	494000	64300	107000	115000	1.18674	0.191377	-2.38551
pme2482	139-85-5	Protocatechuic aldehyde	Catechin derivatives	16900000	23700000	19300000	7130000	6460000	5030000	1.25663	0.310851	-1.6857
pme2493	482-38-2	Kaempferol 3,7-dirhamnoside (Kaempferitrin)	Flavonol	5670000	7700000	12400000	2830000	2540000	2380000	1.20059	0.300737	-1.73342
pme2591	582-60-5	5,6-Dimethylbenzimidazole	Others	104000	159000	169000	9	9	9	1.29317	6.25e-05	-13.9658
pme2786	1210-83-9	N-Acetyl-5-hydroxytryptamine	Tryptamine derivatives	6830000	10800000	9540000	3820000	4370000	4000000	1.2177	0.448657	-1.15632
pme3143	2373-31-1	6-Hydroxy-4-methylcoumarin	Coumarins	115000	123000	94300	48100	62900	53900	1.23342	0.496238	-1.01089
pme3207	3588-17-8	trans,trans-Muconic acid	Organic acids	3960000	3950000	4510000	990000	1080000	1490000	1.26682	0.286634	-1.80272
pme3227	64820-99-1	Vitexin 2''-O-beta-L-rhamnoside	Flavone C-glycosides	1120000	1350000	923000	191000	146000	137000	1.27812	0.139699	-2.8396
pme3246	531-29-3	Coniferin	Hydroxycinnamoyl derivatives	1760000	6020000	2600000	884000	813000	373000	1.11486	0.199422	-2.3261
pme3346	185956-02-9	5-hydroxyhexanoic acid	Organic acids	1680000	2050000	1960000	1300000	477000	666000	1.08349	0.42935	-1.21977
pme3446	4206-58-0	Sinapinaldehyde	Hydroxycinnamoyl derivatives	90600	85500	60800	32600	28000	21500	1.22763	0.34656	-1.52882

## Sheet: Table S6
Table S6. Secondary compounds of inflorescence for pharmacological network analysis.
Index	CAS	Compounds	Class	NX1	NX2	NX3	BW1	BW2	BW3	VIP	Fold_Change	Log2FC
				Peak area
pme2129	13748-90-8	(S)-(-)-2-Hydroxyisocaproic acid	Organic acids	142000	159000	151000	463000	540000	717000	1.26812	3.80531	1.92801
pme2831	657-24-9	1,1-Dimethylbiguanide	Others	110000	45300	97700	174000	181000	155000	1.04264	2.01581	1.01136
pme2706	303-38-8	2,3-Dihydroxybenzoic acid	Organic acids	3580000	2020000	2980000	10800000	12500000	14500000	1.25452	4.40559	2.13934
pme1814	490-79-9	2,5-dihydroxybenzoic acid (Gentisic acid)	Benzoic acid derivatives	464000	266000	461000	1160000	1420000	1640000	1.22916	3.54324	1.82507
pme0286	13748-90-8	2-Hydroxyisocaproic acid	Organic acids	19100	24000	17800	54400	66500	86700	1.24973	3.40887	1.76929
pme0267	498-21-5	2-Methylsuccinic acid	Organic acids	1610000	1750000	1700000	5200000	4550000	4760000	1.28909	2.86759	1.51984
pme2598	102-32-9	3,4-Dihydroxybenzeneacetic acid	Organic acids	226000	229000	233000	1900000	639000	596000	1.13588	4.55669	2.18798
pme3290	2068-02-2	3,7-Di-O-methylquercetin	Flavonol	327000	607000	216000	20200000	7910000	2570000	1.18684	26.6783	4.73759
pme2277	570-23-0	3-Aminosalicylic acid	Organic acids	102000	57800	101000	617000	254000	355000	1.19349	4.70092	2.23294
pme1711	625-08-1	3-Hydroxy-3-methyl butyric acid	Organic acids	192000	296000	262000	1170000	1440000	2370000	1.25024	6.64	2.73118
pme3081	85-87-0	4-(Aminomethyl)-5-(hydroxymethyl)-2-methylpyridin-3-ol	Others	86100	92000	127000	469000	730000	1800000	1.20564	9.82956	3.29713
pmb0764	137-00-8	4-Methyl-5-thiazoleethanol	Others	566000	512000	456000	3060000	4270000	4050000	1.28401	7.41851	2.89113
pme2594	82-82-6	4-Pyridoxic acid	Pyridine derivatives	2290000	931000	1630000	5380000	8390000	8640000	1.20619	4.61967	2.20779
pma3649	106-60-5	5-Aminolevulinate	Organic acids	5200000	4630000	7100000	9140000	18300000	15500000	1.13433	2.53633	1.34274
pme1600	51857-11-5	7-O-Methyleriodictyol	Flavanone	49300	26400	35400	203000	16200000	397000	1.00427	151.215	7.24046
pme1544	480-44-4	Acacetin	Flavone	9	9	9	22800	2870000	42900	1.2322	108730	16.7304
pmb0501	306-60-5	Agmatine	Phenolamides	492000	444000	461000	996000	1060000	885000	1.27642	2.10523	1.07397
pme0208	1617-53-4	Amentoflavone	Flavone	5040	8930	16500	28000	37900	34900	1.13359	3.30817	1.72603
pmb0374	103-84-4	Aminopurine	Others	6970000	8750000	8080000	88800000	62600000	99800000	1.28298	10.5546	3.3998
pme0250	123-99-9	Azelaic Acid	Organic acids	663000	1290000	902000	4550000	2290000	1960000	1.11542	3.08231	1.62401
pmb0069	55-21-0	Benzamide	Others	447000	72600	416000	13000000	28300000	18000000	1.2413	63.3818	5.986
pme1011	618-39-3	Benzamidine	Others	9	9	9	1540000	2320000	1950000	1.29331	215185	17.7152
pme3439	487-52-5	Butein	Flavanone	9	9	9	16600	58500	58000	1.28669	4929.63	12.2673
pme3475	492-14-8	Butin	Flavone	645000	386000	525000	4050000	6260000	7340000	1.27008	11.3432	3.50375
pme3459	469-83-0	Caffeyl alcohol	Hydroxycinnamoyl derivatives	9	9	9	1160000	228000	109000	1.28276	55444.4	15.7588
pme2550	585-84-2	Cis-Aconitic acid	Organic acids	9310	25500	21300	81700	82500	88100	1.20337	4.49652	2.16881
pmb2826	2306-22-1	Citramalate	Organic acids	1500000	1930000	2440000	4530000	5040000	2600000	1.05692	2.07325	1.0519
pme2050	77-92-9	Citric acid	Organic acids	207000000	205000000	209000000	436000000	504000000	379000000	1.26227	2.12399	1.08678
pme1851	57-00-1	Creatine	Organic acids	3060000	2260000	3670000	8460000	7460000	5450000	1.1822	2.37709	1.24919
pme3609	528-58-5	Cyanidin	Anthocyanins	572000	443000	362000	2670000	6300000	3640000	1.25055	9.15759	3.19497
pme1777	2611-67-8	Cyanidin 3,5-O-diglucoside (Cyanin)	Anthocyanins	16100000	551000	989000	46600000	76700000	70300000	1.10303	10.9751	3.45616
pme0094	-	Cyanidin 3-O-glucoside (Kuromanin)	Anthocyanins	23600000	764000	4080000	47300000	67300000	63500000	1.03318	6.26143	2.64649
pme1773	28338-59-2	Cyanidin 3-O-rutinoside (Keracyanin)	Anthocyanins	636000	102000	320000	11600000	16000000	23900000	1.24573	48.6767	5.60516
pme2256	488-82-4	D-Arabitol	Alcohols and polyols	9770	13800	20600	62300	40600	66200	1.20603	3.82839	1.93674
pme0442	528-53-0	Delphinidin	Anthocyanins	76800	66400	109000	422000	533000	645000	1.26594	6.34417	2.66543
pme0291	644-90-6	Dl-2-Aminooctanoic acid	Organic acids	136000	226000	246000	1270000	709000	839000	1.2288	4.63487	2.21253
pme0499	50-70-4	D-Sorbitol	Alcohols and polyols	47900	45600	64000	103000	108000	228000	1.12043	2.7873	1.47887
pme2237	608-66-2	Dulcitol	Alcohols and polyols	75700	60700	85100	128000	151000	344000	1.06896	2.81264	1.49193
pme2246	476-66-4	Ellagic acid	Others	4240000	11700000	4620000	25600000	16600000	17300000	1.10538	2.89397	1.53305
pme1486	989-51-5	Epigallate catechin gallate (EGCG)	Catechin derivatives	510000	2430000	2690000	12500000	9010000	7850000	1.10915	5.21492	2.38265
pme1583	552-58-9	Eriodictyol	Flavanone	606000	433000	867000	4210000	5050000	5610000	1.26563	7.80168	2.96378
pme0309	831-61-8	Ethyl gallate	Benzoic acid derivatives	9	9	9	53000	69900	145000	1.29081	9922.22	13.2764
pme3034	601-75-2	ethylmalonate	Organic acids	18400	34700	28600	76100	44400	83300	1.11249	2.49449	1.31875
pme0243	110-94-1	Glutaric acid	Organic acids	653000	908000	607000	2090000	1190000	2340000	1.14859	2.59225	1.37421
pme1598	69651-80-5	Hesperetin 5-O-glucoside	Flavanone	5500000	7020000	7420000	35300000	54500000	44100000	1.27534	6.71515	2.74742
pma0948	7568-93-6	Hydroxyphenethylamine	Others	9	9	9	5300000	7810000	6420000	1.29339	723333	19.4643
pme0543	1670-81-1	Indole-5-carboxylic acid	Indole derivatives	9	9	9	82000	40400	29200	1.29067	5614.81	12.455
pme1588	480-19-3	Isorhamnetin	Flavonol	4780	4420	8970	58900	56900	71100	1.26854	10.2862	3.36264
pme1540	55033-90-4	Isorhamnetin 3-O-neohesperidoside	Flavonol	312000	415000	510000	2760000	1270000	1490000	1.21061	4.46241	2.15782
pme0200	520-18-3	Kaempferol	Flavonol	23400	41100	53600	1370000	1640000	1210000	1.27974	35.7324	5.15916
pme3268	23627-87-4	Kaempferol 3-O-galactoside (Trifolin)	Flavonol	1340000	1440000	1680000	17900000	36800000	35900000	1.27521	20.3139	4.3444
pme3297	482-39-3	Kaempferol 3-O-rhamnoside (Kaempferin)	Flavonol	9	9	9	560000	1240000	855000	1.29237	98333.3	16.5854
pme1605	17297-56-2	Kaempferol 3-O-robinobioside (Biorobin)	Flavonol	233000	244000	671000	76200000	106000000	97600000	1.28243	243.728	7.92913
pme0369	17650-84-9	Kaempferol 3-O-rutinoside (Nicotiflorin)	Flavonol	217000	289000	687000	78000000	111000000	102000000	1.28219	243.923	7.93028
pme3468	301-19-9	Kaempferol-3-O-robinoside-7-O-rhamnoside (Robinin)	Flavonol	1480	9	9	39800	88600	62300	1.16629	127.303	6.99212
pme1417	61-54-1	L-Tryptamine	Tryptamine derivatives	497000	276000	333000	10200000	17900000	13700000	1.28243	37.7939	5.24008
pme2459	5373-11-5	Luteolin 7-O-glucoside (Cynaroside)	Flavone	1910000	1860000	2270000	18400000	32700000	33800000	1.27672	14.0563	3.81314
pme0444	18470-06-9	Malvidin 3-O-glucoside (Oenin)	Anthocyanins	9	9	9	1120000	1530000	1540000	1.29338	155185	17.2436
pma6281	18069-17-5	Methylglutaric acid	Organic acids	30600	20800	34900	133000	117000	130000	1.26521	4.40324	2.13857
pme3514	6472-38-4	Morin	Flavonol	2560000	5610000	9090000	36000000	26500000	27200000	1.18586	5.19699	2.37768
pme3484	15648-86-9	Myricetin 3-O-galactoside	Flavonol	9	9	9	804000	443000	435000	1.293	62296.3	15.9269
pme0377	480-41-1	Naringenin	Flavanone	618000	402000	520000	4070000	5570000	6670000	1.2767	10.5909	3.40475
pme0330	10236-47-2	Naringenin 7-O-neohesperidoside (Naringin)	Flavanone	9	9	68400	1160000	4270000	6000000	1.09757	167.061	7.38423
pme2960	25515-46-2	Naringenin chalcone	Flavanone	634000	396000	530000	4100000	5630000	7190000	1.27314	10.8462	3.43911
pmb0490	34136-53-3	N-p-Coumaroyl putrescine	Phenolamides	9	9	98700	1310000	2880000	3380000	1.0744	76.6831	6.26084
pme2589	3184-35-8	Oxoadipic acid	Organic acids	57100	58600	55700	104000	159000	154000	1.2323	2.43291	1.28268
pme1397	134-04-3	Pelargonidin	Anthocyanins	9	9	9	314000	152000	121000	1.29175	21740.7	14.4081
pme2366	64-04-0	Phenethylamine	Others	358000	68400	279000	11100000	23800000	15900000	1.25372	72.0159	6.17024
pme1820	156-38-7	p–Hydroxyphenyl acetic acid	Organic acids	96600	142000	132000	456000	257000	267000	1.17552	2.64436	1.40292
pme2979	480-39-7	Pinocembrin (Dihydrochrysin)	Flavanone	134000	142000	201000	680000	620000	640000	1.27205	4.06709	2.024
pme1646	487-36-5	Pinoresinol	Hydroxycinnamoyl derivatives	204000	169000	188000	491000	341000	348000	1.22074	2.10339	1.07271
pme1824	99-50-3	Protocatechuic acid	Catechin derivatives	3370000	1810000	3100000	10200000	11200000	12800000	1.24433	4.13043	2.04629
pme2954	117-39-5	Quercetin	Flavonol	920000	1540000	2670000	9020000	5610000	7040000	1.18139	4.22417	2.07867
pme0361	572-30-5	Quercetin 3-alpha-L-arabinofuranoside (Avicularin)	Flavonol	1620000	1180000	1520000	14500000	34000000	27700000	1.26871	17.6389	4.14069
pme3212	21637-25-2	Quercetin 3-O-glucoside (Isotrifoliin)	Flavonol	684000	739000	713000	2050000	3590000	3040000	1.25535	4.06367	2.02278
pme0197	153-18-4	Quercetin 3-O-rutinoside (Rutin)	Flavonol	109000	78100	140000	4010000	6070000	6730000	1.28425	51.391	5.68344
pme3130	20229-56-5	Quercetin 4'-O-glucoside (Spiraeoside)	Flavonol	722000	718000	803000	1970000	3410000	3060000	1.249	3.76282	1.91181
pmb0711	-	Quercetin 7-O-rutinoside	Flavonol	370000	222000	485000	7230000	13200000	14200000	1.27225	32.1541	5.00693
pme2036	77-95-2	Quinic acid	Quinate and its derivatives	4620000	4490000	5580000	17400000	17300000	13800000	1.27448	3.30157	1.72315
pme0397	-	Shikimic acid	Organic acids	68000	105000	98500	352000	301000	406000	1.25943	3.90055	1.96368
pme3011	56-12-2	γ-aminobutyric acid	Organic acids	221000	176000	96800	385000	427000	599000	1.15208	2.85743	1.51472

## Sheet: Table S7
Table S7. Compounds for network pharmacological analysis of succulent stem.
Index	CAS	Compounds	Class	NX1	NX2	NX3	BW1	BW2	BW3	VIP	Fold_Change	Log2FC
				Peak area
pmb0837	86631-39-2	Procyanidin A3	Proanthocyanidins	43500000	45300000	46600000	17400000	9950000	7610000	1.22161	0.258198	-1.95345
pme0436	23567-23-9	Procyanidin B3	Proanthocyanidins	494000	644000	646000	127000	102000	83700	1.27512	0.17528	-2.51226
pme3227	64820-99-1	Vitexin 2''-O-beta-L-rhamnoside	Flavone C-glycosides	1120000	1350000	923000	191000	146000	137000	1.27812	0.139699	-2.8396
pme2493	482-38-2	Kaempferol 3,7-dirhamnoside (Kaempferitrin)	Flavonol	5670000	7700000	12400000	2830000	2540000	2380000	1.20059	0.300737	-1.73342
pmb2620	14737-89-4	3,4-Dimethoxycinnamic acid	Hydroxycinnamoyl derivatives	1580000	3930000	608000	265000	319000	354000	1.07009	0.153318	-2.7054
pmb0785	119-65-3	Isoquinoline	Alkaloids	278000	213000	158000	64400	131000	77500	1.10836	0.420493	-1.24985
pme0309	99-24-1	Methyl gallate	Benzoic acid derivatives	53200000	71400000	86900000	13400000	18000000	25400000	1.22216	0.268558	-1.89669
pmb3114	-	Epicatechin-epiafzelechin	Catechin derivatives	193000	619000	257000	94400	92300	69200	1.13061	0.239383	-2.06261
pme3143	2373-31-1	6-Hydroxy-4-methylcoumarin	Coumarins	115000	123000	94300	48100	62900	53900	1.23342	0.496238	-1.01089
pme3446	4206-58-0	Sinapinaldehyde	Hydroxycinnamoyl derivatives	90600	85500	60800	32600	28000	21500	1.22763	0.34656	-1.52882
pmb3101	-	2-Isopropylmalate	Organic acids	12400000	15000000	14100000	8730000	3110000	4380000	1.10695	0.390843	-1.35534
pme3346	185956-02-9	5-hydroxyhexanoic acid	Organic acids	1680000	2050000	1960000	1300000	477000	666000	1.08349	0.42935	-1.21977
pme0237	3943-89-3	Ethyl 3,4-Dihydroxybenzoate (Ethyl protocatechuate)	Organic acids	65300	116000	57400	38700	27600	40600	1.08453	0.447842	-1.15894
pma0675	579-75-9	o-Anisic acid	Organic acids	60900	91000	77300	9	9	9	1.29331	0.000117801	-13.0514
1899-29-2	1899-29-2	3-O-Feruloyl quinic acid	Quinate and its derivatives	83200	61000	68700	9	9	9	1.29337	0.00012682	-12.9449
MWS4053	-	Ursolic acid	terpene	465000	357000	707000	277000	118000	198000	1.07873	0.387835	-1.36648
pmb0426	1019-45-0	5-Methoxy-N,N-dimethyltryptamine	Tryptamine derivatives	3310000	4080000	4450000	841000	727000	614000	1.27969	0.184291	-2.43995
pme2786	1210-83-9	N-Acetyl-5-hydroxytryptamine	Tryptamine derivatives	6830000	10800000	9540000	3820000	4370000	4000000	1.2177	0.448657	-1.15632

## Sheet: Table S8
Table S8. Compounds for network pharmacological analysis of inflorescence.
Index	CAS	Compounds	Class	NX1	NX2	NX3	BW1	BW2	BW3	VIP	Fold_Change	Log2FC
				Peak area
3,7-Di-O-methylquercetin	2068-02-2	3,7-Di-O-methylquercetin	Flavonol	327000	607000	216000	20200000	7910000	2570000	1.18684	26.6783	4.73759
pme1588	480-19-3	Isorhamnetin	Flavonol	4780	4420	8970	58900	56900	71100	1.26854	10.2862	3.36264
pme1540	55033-90-4	Isorhamnetin 3-O-neohesperidoside	Flavonol	312000	415000	510000	2760000	1270000	1490000	1.21061	4.46241	2.15782
pme0200	520-18-3	Kaempferol	Flavonol	23400	41100	53600	1370000	1640000	1210000	1.27974	35.7324	5.15916
pme3268	23627-87-4	Kaempferol 3-O-galactoside (Trifolin)	Flavonol	1340000	1440000	1680000	17900000	36800000	35900000	1.27521	20.3139	4.3444
pme3297	482-39-3	Kaempferol 3-O-rhamnoside (Kaempferin)	Flavonol	9	9	9	560000	1240000	855000	1.29237	98333.3	16.5854
pme1605	17297-56-2	Kaempferol 3-O-robinobioside (Biorobin)	Flavonol	233000	244000	671000	76200000	106000000	97600000	1.28243	243.728	7.92913
pme0369	17650-84-9	Kaempferol 3-O-rutinoside (Nicotiflorin)	Flavonol	217000	289000	687000	78000000	111000000	102000000	1.28219	243.923	7.93028
pme3468	301-19-9	Kaempferol-3-O-robinoside-7-O-rhamnoside (Robinin)	Flavonol	1480	9	9	39800	88600	62300	1.16629	127.303	6.99212
pme3514	6472-38-4	Morin	Flavonol	2560000	5610000	9090000	36000000	26500000	27200000	1.18586	5.19699	2.37768
pme3484	15648-86-9	Myricetin 3-O-galactoside	Flavonol	9	9	9	804000	443000	435000	1.293	62296.3	15.9269
pme2954	117-39-5	Quercetin	Flavonol	920000	1540000	2670000	9020000	5610000	7040000	1.18139	4.22417	2.07867
pme0361	572-30-5	Quercetin 3-alpha-L-arabinofuranoside (Avicularin)	Flavonol	1620000	1180000	1520000	14500000	34000000	27700000	1.26871	17.6389	4.14069
pme3212	21637-25-2	Quercetin 3-O-glucoside (Isotrifoliin)	Flavonol	684000	739000	713000	2050000	3590000	3040000	1.25535	4.06367	2.02278
pme0197	153-18-4	Quercetin 3-O-rutinoside (Rutin)	Flavonol	109000	78100	140000	4010000	6070000	6730000	1.28425	51.391	5.68344
pme3130	20229-56-5	Quercetin 4'-O-glucoside (Spiraeoside)	Flavonol	722000	718000	803000	1970000	3410000	3060000	1.249	3.76282	1.91181
pmb0711	-	Quercetin 7-O-rutinoside	Flavonol	370000	222000	485000	7230000	13200000	14200000	1.27225	32.1541	5.00693
pme1600	51857-11-5	7-O-Methyleriodictyol	Flavanone	49300	26400	35400	203000	16200000	397000	1.00427	151.215	7.24046
pme3439	487-52-5	Butein	Flavanone	9	9	9	16600	58500	58000	1.28669	4929.63	12.2673
pme1583	552-58-9	Eriodictyol	Flavanone	606000	433000	867000	4210000	5050000	5610000	1.26563	7.80168	2.96378
pme1598	69651-80-5	Hesperetin 5-O-glucoside	Flavanone	5500000	7020000	7420000	35300000	54500000	44100000	1.27534	6.71515	2.74742
pme0377	480-41-1	Naringenin	Flavanone	618000	402000	520000	4070000	5570000	6670000	1.2767	10.5909	3.40475
pme0330	10236-47-2	Naringenin 7-O-neohesperidoside (Naringin)	Flavanone	9	9	68400	1160000	4270000	6000000	1.09757	167.061	7.38423
pme2960	25515-46-2	Naringenin chalcone	Flavanone	634000	396000	530000	4100000	5630000	7190000	1.27314	10.8462	3.43911
pme2979	480-39-7	Pinocembrin (Dihydrochrysin)	Flavanone	134000	142000	201000	680000	620000	640000	1.27205	4.06709	2.024
pme3609	528-58-5	Cyanidin	Anthocyanins	572000	443000	362000	2670000	6300000	3640000	1.25055	9.15759	3.19497
pme1777	2611-67-8	Cyanidin 3,5-O-diglucoside (Cyanin)	Anthocyanins	16100000	551000	989000	46600000	76700000	70300000	1.10303	10.9751	3.45616
pme0094	-	Cyanidin 3-O-glucoside (Kuromanin)	Anthocyanins	23600000	764000	4080000	47300000	67300000	63500000	1.03318	6.26143	2.64649
pme1773	28338-59-2	Cyanidin 3-O-rutinoside (Keracyanin)	Anthocyanins	636000	102000	320000	11600000	16000000	23900000	1.24573	48.6767	5.60516
pme0442	528-53-0	Delphinidin	Anthocyanins	76800	66400	109000	422000	533000	645000	1.26594	6.34417	2.66543
pme0444	18470-06-9	Malvidin 3-O-glucoside (Oenin)	Anthocyanins	9	9	9	1120000	1530000	1540000	1.29338	155185	17.2436
pme1397	134-04-3	Pelargonidin	Anthocyanins	9	9	9	314000	152000	121000	1.29175	21740.7	14.4081
pme1544	480-44-4	Acacetin	Flavone	9	9	9	22800	2870000	42900	1.2322	108730	16.7304
pme0208	1617-53-4	Amentoflavone	Flavone	5040	8930	16500	28000	37900	34900	1.13359	3.30817	1.72603
pme3475	492-14-8	Butin	Flavone	645000	386000	525000	4050000	6260000	7340000	1.27008	11.3432	3.50375
pme2459	5373-11-5	Luteolin 7-O-glucoside (Cynaroside)	Flavone	1910000	1860000	2270000	18400000	32700000	33800000	1.27672	14.0563	3.81314
pme2256	488-82-4	D-Arabitol	Alcohols and polyols	9770	13800	20600	62300	40600	66200	1.20603	3.82839	1.93674
pme0499	50-70-4	D-Sorbitol	Alcohols and polyols	47900	45600	64000	103000	108000	228000	1.12043	2.7873	1.47887
pme2237	608-66-2	Dulcitol	Alcohols and polyols	75700	60700	85100	128000	151000	344000	1.06896	2.81264	1.49193
pme0309	831-61-8	Ethyl gallate	Benzoic acid derivatives	9	9	9	53000	69900	145000	1.29081	9922.22	13.2764
pme1486	989-51-5	Epigallate catechin gallate (EGCG)	Catechin derivatives	510000	2430000	2690000	12500000	9010000	7850000	1.10915	5.21492	2.38265
pme1824	99-50-3	Protocatechuic acid	Catechin derivatives	3370000	1810000	3100000	10200000	11200000	12800000	1.24433	4.13043	2.04629
pme3459	469-83-0	Caffeyl alcohol	Hydroxycinnamoyl derivatives	9	9	9	1160000	228000	109000	1.28276	55444.4	15.7588
pme1646	487-36-5	Pinoresinol	Hydroxycinnamoyl derivatives	204000	169000	188000	491000	341000	348000	1.22074	2.10339	1.07271
pme2129	13748-90-8	(S)-(-)-2-Hydroxyisocaproic acid	Organic acids	142000	159000	151000	463000	540000	717000	1.26812	3.80531	1.92801
pme0286	13748-90-8	2-Hydroxyisocaproic acid	Organic acids	19100	24000	17800	54400	66500	86700	1.24973	3.40887	1.76929
pme2598	102-32-9	3,4-Dihydroxybenzeneacetic acid	Organic acids	226000	229000	233000	1900000	639000	596000	1.13588	4.55669	2.18798
3-Aminosalicylic acid	570-23-0	3-Aminosalicylic acid	Organic acids	102000	57800	101000	617000	254000	355000	1.19349	4.70092	2.23294
pme0250	123-99-9	Azelaic Acid	Organic acids	663000	1290000	902000	4550000	2290000	1960000	1.11542	3.08231	1.62401
pme0291	644-90-6	Dl-2-Aminooctanoic acid	Organic acids	136000	226000	246000	1270000	709000	839000	1.2288	4.63487	2.21253
pme0243	110-94-1	Glutaric acid	Organic acids	653000	908000	607000	2090000	1190000	2340000	1.14859	2.59225	1.37421
pma6281	18069-17-5	Methylglutaric acid	Organic acids	30600	20800	34900	133000	117000	130000	1.26521	4.40324	2.13857
pme2589	3184-35-8	Oxoadipic acid	Organic acids	57100	58600	55700	104000	159000	154000	1.2323	2.43291	1.28268
pme1820	156-38-7	p–Hydroxyphenyl acetic acid	Organic acids	96600	142000	132000	456000	257000	267000	1.17552	2.64436	1.40292
pme0397	-	Shikimic acid	Organic acids	68000	105000	98500	352000	301000	406000	1.25943	3.90055	1.96368
pmb0501	306-60-5	Agmatine	Phenolamides	492000	444000	461000	996000	1060000	885000	1.27642	2.10523	1.07397
pmb0490	34136-53-3	N-p-Coumaroyl putrescine	Phenolamides	9	9	98700	1310000	2880000	3380000	1.0744	76.6831	6.26084
pme2036	77-95-2	Quinic acid	Quinate and its derivatives	4620000	4490000	5580000	17400000	17300000	13800000	1.27448	3.30157	1.72315
pme1417	61-54-1	L-Tryptamine	Tryptamine derivatives	497000	276000	333000	10200000	17900000	13700000	1.28243	37.7939	5.24008
pme2831	657-24-9	1,1-Dimethylbiguanide	Others	110000	45300	97700	174000	181000	155000	1.04264	2.01581	1.01136
pmb0374	103-84-4	Aminopurine	Others	6970000	8750000	8080000	88800000	62600000	99800000	1.28298	10.5546	3.3998
pmb0069	55-21-0	Benzamide	Others	447000	72600	416000	13000000	28300000	18000000	1.2413	63.3818	5.986
pme1011	618-39-3	Benzamidine	Others	9	9	9	1540000	2320000	1950000	1.29331	215185	17.7152
pme2246	476-66-4	Ellagic acid	Others	4240000	11700000	4620000	25600000	16600000	17300000	1.10538	2.89397	1.53305
pme2366	64-04-0	Phenethylamine	Others	358000	68400	279000	11100000	23800000	15900000	1.25372	72.0159	6.17024

## Sheet: Table S9
Table S9. Molecular docking results of 65 compounds of inflorescence with ALB, MPO, and NOS2 protein target molecules.
CAS	Compounds	Class	Binding affinity(ALB) (kcal/mol)	Binding affinity (MPO) (kcal/mol)	Binding affinity (NOS2) (kcal/mol)
147714-62-3	Quercetin 7-O-rutinoside	Flavonol	-9.4	-12.2	-10.7
17297-56-2	Kaempferol 3-O-robinobioside (Biorobin)	Flavonol	-8.6	-11.1	-11.4
20229-56-5	Quercetin 4'-O-glucoside (Spiraeoside)	Flavonol	-9.1	-11.7	-9.5
301-19-9	Kaempferol-3-O-robinoside-7-O-rhamnoside (Robinin)	Flavonol	-9	-10	-10.9
153-18-4	Quercetin 3-O-rutinoside (Rutin)	Flavonol	-9.2	-10.3	-10.4
17650-84-9	Kaempferol 3-O-rutinoside (Nicotiflorin)	Flavonol	-8.6	-10.5	-10.7
482-39-3	Kaempferol 3-O-rhamnoside (Kaempferin)	Flavonol	-8.6	-9.9	-11.1
15648-86-9	Myricetin 3-O-galactoside	Flavonol	-8.9	-9.7	-10.8
23627-87-4	Kaempferol 3-O-galactoside (Trifolin)	Flavonol	-8	-10.2	-11
572-30-5	Quercetin 3-alpha-L-arabinofuranoside (Avicularin)	Flavonol	-8.6	-9.7	-10.5
21637-25-2	Quercetin 3-O-glucoside (Isotrifoliin)	Flavonol	-8.1	-9.5	-10.5
6472-38-4	Morin	Flavonol	-8.2	-9.8	-9.7
520-18-3	Kaempferol	Flavonol	-8	-9.4	-10
55033-90-4	Isorhamnetin 3-O-neohesperidoside	Flavonol	-8.1	-9.6	-9.5
117-39-5	Quercetin	Flavonol	-7.9	-9.7	-9.4
480-19-3	Isorhamnetin	Flavonol	-7.8	-9.5	-9.6
2068-02-2	3,7-Di-O-methylquercetin	Flavonol	-8.6	-9.8	-8.4
1617-53-4	Amentoflavone	Flavone	-11.9	-11.2	-12.3
1268798	Luteolin 7-O-glucoside (Cynaroside)	Flavone	-9.5	-11.2	-10.5
480-44-4	Acacetin	Flavone	-8.3	-9.2	-10.3
492-14-8	Butin	Flavone	-8.4	-9.7	-9.6
10236-47-2	Naringenin 7-O-neohesperidoside (Naringin)	Flavanone	-9.1	-11.2	-10.9
69651-80-5	Hesperetin 5-O-glucoside	Flavanone	-8.2	-10.7	-9.1
51857-11-5	7-O-Methyleriodictyol	Flavanone	-8.6	-9.7	-9.6
480-41-1	Naringenin	Flavanone	-8.2	-9.7	-10
480-39-7	Pinocembrin (Dihydrochrysin)	Flavanone	-8.1	-9.3	-10.1
552-58-9	Eriodictyol	Flavanone	-8.2	-9.5	-9.3
25515-46-2	Naringenin chalcone	Flavanone	-7.4	-8.4	-9.3
487-52-5	Butein	Flavanone	-7.9	-8.5	-7.5
28338-59-2	Cyanidin 3-O-rutinoside (Keracyanin)	Anthocyanins	-9.1	-10.3	-11.4
2611-67-8	Cyanidin 3,5-O-diglucoside (Cyanin)	Anthocyanins	-8.9	-9.3	-11.4
-	Cyanidin 3-O-glucoside (Kuromanin)	Anthocyanins	-9.2	-9.7	-10.7
18470-06-9	Malvidin 3-O-glucoside (Oenin)	Anthocyanins	-8.4	-9.1	-10.5
528-53-0	Delphinidin	Anthocyanins	-8.2	-9.4	-9.3
528-58-5	Cyanidin	Anthocyanins	-8.2	-9.4	-9.2
134-04-3	Pelargonidin	Anthocyanins	-7.9	-9.2	-9.4
487-36-5	Pinoresinol	Hydroxycinnamoyl derivatives	-8.5	-9.2	-8.4
469-83-0	Caffeyl alcohol	Hydroxycinnamoyl derivatives	-8.1	-8.2	-7.9
61-54-1	L-Tryptamine	Tryptamine derivatives	-5.9	-6.5	-7.6
77-95-2	Quinic acid	Quinate and its derivatives	-5.9	-6.3	-6.5
34136-53-3	N-p-Coumaroyl putrescine	Phenolamides	-6.4	-7	-7.6
306-60-5	Agmatine	Phenolamides	-4.7	-4.7	-4.4
476-66-4	Ellagic acid	Others	-8.4	-9.5	-8.8
55-21-0	Benzamide	Others	-5.8	-7.3	-7.2
103-84-4	Aminopurine	Others	-6.3	-6.2	-7.1
618-39-3	Benzamidine	Others	-5.7	-5.8	-6.6
64-04-0	Phenethylamine	Others	-5.3	-5.3	-6.8
657-24-9	1,1-Dimethylbiguanide	Others	-5.4	-5.4	-5.4
156-38-7	p–Hydroxyphenyl acetic acid	Organic acids	-6.1	-6.2	-7.2
570-23-0	3-Aminosalicylic acid	Organic acids	-5.9	-6.4	-7.1
102-32-9	3,4-Dihydroxybenzeneacetic acid	Organic acids	-6.3	-6.5	-6.6
138-59-0	Shikimic acid	Organic acids	-5.4	-6.1	-5.9
3184-35-8	Oxoadipic acid	Organic acids	-5.2	-6.5	-5.3
123-99-9	Azelaic Acid	Organic acids	-5.3	-5.4	-5.5
644-90-6	Dl-2-Aminooctanoic acid	Organic acids	-5.3	-5.1	-5.5
18069-17-5	Methylglutaric acid	Organic acids	-5.1	-5.2	-5.4
13748-90-8	2-Hydroxyisocaproic acid	Organic acids	-5.1	-4.9	-5.7
13748-90-8	(S)-(-)-2-Hydroxyisocaproic acid	Organic acids	-5.1	-4.9	-5.3
110-94-1	Glutaric acid	Organic acids	-4.7	-4.7	-4.8
989-51-5	Epigallate catechin gallate (EGCG)	Catechin derivatives	-8.6	-10	-9.6
99-50-3	Protocatechuic acid	Catechin derivatives	-6	-6.5	-6.8
831-61-8	Ethyl gallate	Benzoic acid derivatives	-6	-7	-7
608-66-2	Dulcitol	Alcohols and polyols	-4.7	-5.9	-5.3
50-70-4	D-Sorbitol	Alcohols and polyols	-5	-5.3	-5.5
488-82-4	D-Arabitol	Alcohols and polyols	-4.6	-5.4	-5.4
-	fenofibrate	Positive drug	-8.7	-8.6	-9.6
-	Simvastatin	Positive drug	-8.5	-8	-9.2
-	Gemfibrozil	Positive drug	-7.1	-7.7	-8.4

## Sheet: Table S10
Table S10. Molecular docking results of 18 compounds of the succulent stem with ALB, MPO, and NOS2 protein target.
CAS	Compounds	Class	Binding affinity(ALB) (kcal/mol)	Binding affinity (MPO) (kcal/mol)	Binding affinity (NOS2) (kcal/mol)
482-38-2	Kaempferol 3,7-dirhamnoside (Kaempferitrin)	Flavonol	-9.2	-9.7	-9.5
23567-23-9	Procyanidin B3	Proanthocyanidins	-9.5	-10.6	-9.9
86631-39-2	Procyanidin A3	Proanthocyanidins	-10.3	-10.7	-7.9
77-52-1	Ursolic acid	terpene	-8.9	-11	-9.9
64820-99-1	Vitexin 2''-O-beta-L-rhamnoside	Flavone C-glycosides	-7.8	-8.6	-10.7
-	Epicatechin-epiafzelechin	Catechin derivatives	-9.2	-10.4	-10.9
1899-29-2	3-O-Feruloyl quinic acid	Quinate and its derivatives	-7.5	-8.6	-7.9
119-65-3	Isoquinoline	Alkaloids	-5.8	-6.3	-8.3
99-24-1	Methyl gallate	Benzoic acid derivatives	-5.9	-6.9	-6.7
1019-45-0	5-Methoxy-N,N-dimethyltryptamine	Tryptamine derivatives	-6.6	-7.3	-7.7
1210-83-9	N-Acetyl-5-hydroxytryptamine	Tryptamine derivatives	-6.7	-8	-8.5
14737-89-4	3,4-Dimethoxycinnamic acid	Hydroxycinnamoyl derivatives	-6.2	-7	-7.1
118-34-3	Syringin	Hydroxycinnamoyl derivatives	-6.7	-8	-7.6
49601-06-1	2-Isopropylmalate	Organic acids	-5.8	-5.5	-5.5
185956-02-9	5-hydroxyhexanoic acid	Organic acids	-4.7	-4.5	-5.2
3943-89-3	Ethyl 3,4-Dihydroxybenzoate (Ethyl protocatechuate)	Organic acids	-6.4	-6.6	-6.8
579-75-9	o-Anisic acid	Organic acids	-6	-6.2	-7.2
2373-31-1	6-Hydroxy-4-methylcoumarin	Coumarins	-6.9	-7.4	-8.5
-	fenofibrate	Positive drug	-8.7	-8.6	-9.6
-	Simvastatin	Positive drug	-8.5	-8	-9.2
-	Gemfibrozil	Positive drug	-7.1	-7.7	-8.4
